# Supplementary material for: A remarkable regiocontrol in the palladium-catalyzed silylstannylation of fluoroalkylated alkynes – highly regio- and stereoselective synthesis of multi-substituted fluorine-containing alkenes
Source: Royal Society of Chemistry journal article supplement (doi:10.1039/c3ob41903g), 2013-12-20

# *Supporting Information*

**A remarkable regiocontrol in the palladium-catalyzed  
silylstannylation of fluoroalkylated alkynes  
–Highly regio- and stereoselective synthesis of multi-substituted  
fluorine-containing alkenes**

Tsutomu Konno,\*<sup>a</sup> Ryoko Kinugawa,<sup>a</sup> Takashi Ishihara<sup>a</sup> and Shigeyuki Yamada<sup>b</sup>

<sup>a</sup>*Department of Chemistry and Material Technology, Kyoto Institute of Technology,  
Matsugasaki, Sakyo-ku, Kyoto 606-0962, Japan. Fax: +81 75 724 7580; Tel: +81 75 724 7517; E-mail: konno@kit.ac.jp*

<sup>b</sup>*Department of Applied Chemistry, Graduate School of Engineering, Tokyo University of Agriculture and Technology,  
2-24-16 Nakamachi, Koganei 184-8588, Japan; E-mail: s\_yamada@cc.tuat.ac.jp*

## General procedures

Infrared spectra (IR) were determined in a liquid film on a NaCl plate or KBr disk method with a JASCO FT/IR-4100 typeA spectrometer.  $^1\text{H}$  and  $^{13}\text{C}$  NMR spectra were measured with a JEOL JNM-AL400 NMR spectrometer in a chloroform-*d* ( $\text{CDCl}_3$ ) solution with tetramethylsilane ( $\text{Me}_4\text{Si}$ ) as an internal reference. A JEOL JNM-EX90A (84.21 MHz) FT-NMR spectrometer and a JEOL JNM-AL400 NMR spectrometer were used for determining the yields of the products with hexafluorobenzene ( $\text{C}_6\text{F}_6$ ).  $^{19}\text{F}$  NMR (376.05 MHz) spectra were measured with a JEOL JNM-AL 400 NMR spectrometer in a chloroform-*d* ( $\text{CDCl}_3$ ) solution with trichlorofluoromethane ( $\text{CFCl}_3$ ) as an internal standard. High-resolution mass spectra (HRMS) were taken on a JEOL JMS-700MS spectrometer by electron impact (EI), chemical ionization (CI), and fast atom bombardment (FAB) methods.

All reactions were routinely monitored by  $^{19}\text{F}$  NMR spectroscopy or TLC, and carried out under an atmosphere of argon.

## Materials

*N,N*-Dimethylformamide (DMF), triethylamine ( $\text{Et}_3\text{N}$ ), and hexamethylphosphoric triamide (HMDS) were freshly distilled from calcium hydride ( $\text{CaH}_2$ ). All chemicals were of reagent grade and, if necessary, were purified in the usual manner prior to use. Thin-layer chromatography (TLC) was done with Merck silica gel 60  $\text{F}_{254}$  plates, and column chromatography was carried out using Wako gel C-200 as adsorbent.

**Typical procedure for the silylstannylation of 1-(4-chlorophenyl)-3,3,3-trifluoropropyne (Condition A):** To a solution of 1-(4-chlorophenyl)-3,3,3-trifluoropropyne (0.051 g, 0.25 mmol) and  $\text{Pd}(\text{PPh}_3)_2\text{Cl}_2$  (0.007 g, 0.00625 mmol, 2.5 mol%) in THF (2.5 mL) was added a THF solution of trimethyl(tributylstannyl)silane (0.109 g, 0.30 mmol) at room temperature. The reaction was stirred at 80 °C for 6 h. The resulting mixture was then quenched with  $\text{H}_2\text{O}$ . The reaction mixture was extracted with  $\text{Et}_2\text{O}$  three times. The combined organic layers were dried over anhydrous  $\text{Na}_2\text{SO}_4$  and concentrated in *vacuo*. The residue was chromatographed on silica gel (Hexane :  $\text{EtOAc}$  = 30 : 1) to afford the corresponding silylstannylated products as a regioisomeric mixture of **2d** and **3d** (0.089g, 0.16 mmol, 63%).

## (*Z*)-3,3,3-Trifluoro-1-(4-methoxyphenyl)-1-tributylstannyl-2-trimethylsilyl-1-propene (2a)

Isolated yield : 75% (Eluent of silica gel column chromatography; Hexane :  $\text{EtOAc}$  = 30 : 1. This compound was isolated as a mixture of the

regioisomers **2a** and **3a**.)

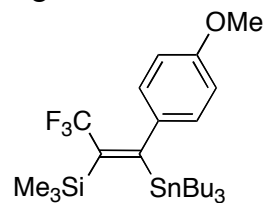

(Major isomer);  $^1\text{H}$  NMR ( $\text{CDCl}_3$ )  $\delta$  = 0.32 (s, 9H), 0.80 – 0.92 (m, 15H), 1.21 – 1.35 (m, 12H), 3.79 (s, 3H), 6.70 (d,  $J$  = 8.2 Hz, 2H), 6.80 (d,  $J$  = 8.2 Hz, 2H);  $^{13}\text{C}$  NMR ( $\text{CDCl}_3$ )  $\delta$  = 1.4, 13.7, 13.8, 27.7, 29.2, 55.3, 113.3, 125.1 (q,  $J$  = 283.4 Hz), 125.7 (d,  $J$  = 2.5 Hz), 139.9, 143.5 (q,  $J$  = 24.0 Hz), 157.5, 174.2 (q,  $J$  = 5.6 Hz);  $^{19}\text{F}$  NMR ( $\text{CDCl}_3$ )  $\delta$  = -49.64 (s, 3F); IR (neat)  $\nu$  2957, 2923, 2873, 1875, 1730, 1606, 1501, 1464, 1377, 1340, 1241, 1187, 1140, 1101, 1039, 961, 837, 768  $\text{cm}^{-1}$ ; HRMS (FAB) calcd for (M-H)  $\text{C}_{25}\text{H}_{42}\text{F}_3\text{OSiSn}$ : 563.1979, found 563.1983.

### (Z)-3,3,3-Trifluoro-1-(3-methoxyphenyl)-1-tributylstannyl-2-trimethylsilyl-1-propene (**2b**)

Isolated yield : 56% (Eluent of silica gel column chromatography; Hexane only. This compound was isolated as a mixture of the regioisomers **2b** and **3b**.)

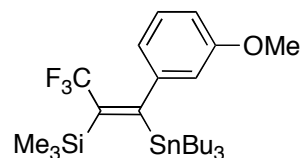

(Major isomer);  $^1\text{H}$  NMR ( $\text{CDCl}_3$ )  $\delta$  = 0.32 (s, 9H), 0.78 – 0.94 (m, 15H), 1.31 – 1.39 (m, 12H), 3.78 (s, 3H), 6.32 – 6.38 (m, 2H), 6.61 – 6.64 (m, 1H), 7.13 – 7.17 (m, 1H);  $^{13}\text{C}$  NMR ( $\text{CDCl}_3$ )  $\delta$  = 1.42, 13.77, 13.84, 27.6, 29.1, 55.4, 110.2 (q,  $J$  = 2.5 Hz), 110.6, 117.1 (d,  $J$  = 2.5 Hz), 125.1 (q,  $J$  = 283.5 Hz), 129.0, 142.4 (q,  $J$  = 24.0 Hz), 149.0, 159.3, 173.5 (q,  $J$  = 5.8 Hz);  $^{19}\text{F}$  NMR ( $\text{CDCl}_3$ )  $\delta$  = -49.77 (s, 3F); IR (neat)  $\nu$  2957, 2923, 2873, 1731, 1597, 1465, 1377, 1253, 1145, 1101, 1050, 917, 842, 764, 698  $\text{cm}^{-1}$ ; HRMS (FAB) calcd for (M-H)  $\text{C}_{25}\text{H}_{42}\text{F}_3\text{OSiSn}$ : 563.1979, found 563.1982.

### (Z)-3,3,3-Trifluoro-1-(2-methoxyphenyl)-1-tributylstannyl-2-trimethylsilyl-1-propene (**2c**)

Isolated yield : 61% (Eluent of silica gel column chromatography; Hexane : EtOAc = 30 : 1. This compound was isolated as a mixture of the regioisomer **2c** and **3c**.)

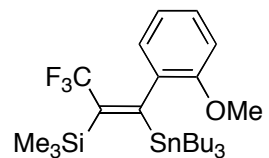

(Major isomer);  $^1\text{H}$  NMR ( $\text{CDCl}_3$ )  $\delta$  = 0.32 (s, 9H), 0.68 – 0.92 (m, 15H), 1.19 – 1.38 (m, 12H), 3.74 (s, 3H), 6.67 (d,  $J$  = 7.6 Hz, 1H), 6.75 (d,  $J$  = 7.6 Hz, 1H), 6.85 (t,  $J$  = 7.6 Hz, 1H), 7.10 (t,  $J$  = 7.6 Hz, 1H);  $^{13}\text{C}$  NMR ( $\text{CDCl}_3$ )  $\delta$  = 1.06, 13.4, 13.6, 27.4, 28.7, 54.9, 109.4, 120.0, 124.9 (q,  $J$  = 283.5 Hz), 124.8 (d,  $J$  = 2.5 Hz), 126.7, 136.4, 142.0 (q,  $J$  = 23.9 Hz), 153.3, 170.6 (q,  $J$  =

5.7 Hz);  $^{19}\text{F}$  NMR ( $\text{CDCl}_3$ )  $\delta = -51.22$  (s, 3F); IR (neat)  $\nu$  2957, 2873, 1731, 1596, 1483, 1464, 1377, 1235, 1174, 1140, 1102, 1048, 844, 805, 749  $\text{cm}^{-1}$ .

**(Z)-1-(4-Chlorophenyl)-3,3,3-trifluoro-1-tributylstannyl-2-trimethylsilyl-1-propene (2d)**

Isolated yield : 63% (Eluent of silica gel column chromatography; Hexane : EtOAc = 30 : 1. This compound was isolated as a mixture of the regioisomer **2d** and **3d**.)

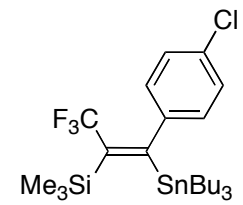 (Major isomer);  $^1\text{H}$  NMR ( $\text{CDCl}_3$ )  $\delta$  0.31 (s, 9H), 0.80 – 1.45 (m, 18H), 0.85 (t,  $J = 7.39$  Hz, 9H), 6.71 (d,  $J = 8.8$  Hz, 2H), 7.22 (d,  $J = 8.8$  Hz, 2H);  $^{13}\text{C}$  NMR ( $\text{CDCl}_3$ )  $\delta$  1.3, 13.8, 13.9, 27.6, 29.2, 125.0 (q,  $J = 283.5$  Hz), 125.8 – 126.1 (m, 1C), 128.0, 131.0, 143.9 (q,  $J = 24.0$  Hz), 146.1, 172.5 (q,  $J = 5.7$  Hz);  $^{19}\text{F}$  NMR ( $\text{CDCl}_3$ )  $\delta$  -49.70 (s, 3F); IR (neat)  $\nu$  2957, 2923, 2873, 1721, 1483, 1252, 1233, 1184, 1142, 1097, 1015, 962  $\text{cm}^{-1}$ .

**(Z)-Ethyl 4-(3,3,3-trifluoro-1-tributylstannyl-2-trimethylsilylpropen-1-yl)benzoate (2e)**

Isolated yield : 65% (Eluent of silica gel column chromatography; Hexane : EtOAc = 30 : 1. This compound was isolated as a mixture of the regioisomer **2e** and **3e**.)

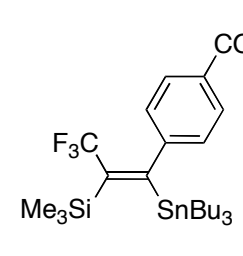 (Major isomer);  $^1\text{H}$  NMR ( $\text{CDCl}_3$ )  $\delta$  = 0.33 (s, 9H), 0.75 – 0.95 (m, 15H), 1.10 – 1.41 (m, 15H), 4.36 (q,  $J = 6.8$  Hz, 2H), 6.85 (d,  $J = 8.8$  Hz, 2H), 7.94 (d,  $J = 8.8$  Hz, 2H);  $^{13}\text{C}$  NMR ( $\text{CDCl}_3$ )  $\delta$  = 0.63, 13.6, 13.9, 14.6, 27.6, 29.1, 61.0, 124.4 – 124.5 (m, 1C), 126.2 (q,  $J = 280.2$  Hz), 126.4, 126.5, 128.0, 129.1, 146.5 (q,  $J = 28.1$  Hz), 166.9, 167.6 (q,  $J = 6.6$  Hz);  $^{19}\text{F}$  NMR ( $\text{CDCl}_3$ )  $\delta$  = -49.83 (s, 3F); IR (neat)  $\nu$  2957, 2923, 2873, 1720, 1605, 1464, 1403, 1282, 1233, 1134, 1098, 1022, 951, 844, 748, 705  $\text{cm}^{-1}$ ; HRMS (FAB) calcd for (M+H)  $\text{C}_{27}\text{H}_{46}\text{F}_3\text{O}_2\text{SiSn}$ : 607.2241, found 607.2249.

**(Z)-Ethyl 4,4,4-Trifluoro-2-tributylstannyl-3-trimethylsilyl-2-propenoate (2f)**

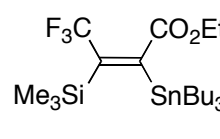 Combined isolated yield : 52% (Eluent of silica gel column chromatography; Hexane : EtOAc = 10 : 1. Two regioisomers could not be separated completely, but each isomer could be partially obtained in a pure form.)  
(Minor isomer);  $^1\text{H}$  NMR ( $\text{CDCl}_3$ )  $\delta$  = 0.20 (s, 9H), 0.17 – 1.05 (m, 15H), 1.25 – 1.52 (m, 15H), 4.15 (q,  $J = 7.2$  Hz, 2H);  $^{13}\text{C}$

NMR (CDCl<sub>3</sub>)  $\delta$  = 1.0, 12.2 (q,  $J$  = 3.2 Hz), 13.6, 14.1, 27.1, 28.6, 60.5, 126.3 (q,  $J$  = 273.6 Hz), 143.8 (q,  $J$  = 28.1 Hz), 161.9 (q,  $J$  = 9.9 Hz), 172.5; <sup>19</sup>F NMR (CDCl<sub>3</sub>)  $\delta$  = -58.70 (s, 3F); IR (neat)  $\nu$  2958, 2925, 2873, 1714, 1571, 1465, 1378, 1254, 1215, 1147, 1116, 1034, 924, 848, 768, 671, 630 cm<sup>-1</sup>; HRMS (FAB) calcd for (M+Na) C<sub>21</sub>H<sub>41</sub>F<sub>3</sub>NaO<sub>2</sub>SiSn: 553.1748, found 553.1744.

**(Z)-Ethyl 4,4,4-Trifluoro-3-tributylstannyl-2-trimethylsilyl-2-propenoate (3f)**

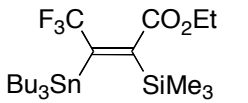 (Major isomer); <sup>1</sup>H NMR (CDCl<sub>3</sub>)  $\delta$  = 0.24 (s, 9H), 0.90 (t,  $J$  = 7.2 Hz, 9H), 1.07 – 1.60 (m, 21H), 4.18 (q,  $J$  = 7.2 Hz, 2H); <sup>13</sup>C NMR (CDCl<sub>3</sub>)  $\delta$  = 0.6, 13.4 – 13.5 (m, 1C), 14.3, 14.8, 27.9, 29.3, 61.5, 126.3 (q,  $J$  = 278.5 Hz), 146.6 (q,  $J$  = 31.4 Hz), 157.5 (q,  $J$  = 6.6 Hz), 172.0 (q,  $J$  = 1.7 Hz); <sup>19</sup>F NMR (CDCl<sub>3</sub>)  $\delta$  = -55.98 (s, 3F); IR (neat) 2958, 2925, 2873, 1720, 1567, 1464, 1378, 1231, 1146, 1107, 1034, 991, 851, 763, 694, 670 cm<sup>-1</sup>; HRMS (FAB) calcd for (M+H) C<sub>21</sub>H<sub>42</sub>F<sub>3</sub>O<sub>2</sub>SiSn: 531.1928, found 531.1927.

**Typical procedure for silylstannylation of 1-(4-chlorophenyl)-3,3,3-trifluoropropyne (Condition B):** To a solution of 1-(4-chlorophenyl)-3,3,3-trifluoropropyne (0.051 g, 0.25 mmol) and Pd(*t*-BuNC)<sub>2</sub>Cl<sub>2</sub> (0.002 g, 0.00625 mmol, 2.5 mol%) in THF (2.5 mL) was added a THF solution of trimethyl(tributylstannyl)silane (0.109 g, 0.30 mmol) at room temperature. The reaction was stirred for 6 h at room temperature. The resulting mixture was then quenched with H<sub>2</sub>O. The reaction mixture was extracted with Et<sub>2</sub>O three times. The combined organic layers were dried over anhydrous Na<sub>2</sub>SO<sub>4</sub> and concentrated in *vacuo*. The residue was chromatographed on silica gel (hexane: EtOAc = 30 : 1) to afford the corresponding silylstannylated product **2** and **3** (0.128 g, 0.23 mmol, 90%).

**(Z)-3,3,3-Trifluoro-1-(4-methoxyphenyl)-2-tributylstannyl-1-trimethylsilyl-1-propene (3a)**

Isolated yield : 82% (Eluent of silica gel column chromatography; Hexane : EtOAc = 30 : 1. This compound was isolated as a mixture of the regioisomer **2a** and **3a**.)

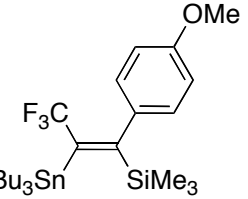 (Major isomer); <sup>1</sup>H NMR (CDCl<sub>3</sub>)  $\delta$  = 0.06 (s, 9H), 0.83 – 0.94 (m, 11H), 1.08 – 1.12 (m, 4H), 1.34 – 1.39 (m, 6H), 1.51 – 1.54 (m, 6H), 3.79 (s, 3H), 6.68 – 6.81 (m, 4H); <sup>13</sup>C NMR (CDCl<sub>3</sub>)  $\delta$  = 0.8, 13.6 (m, 1C), 14.0, 27.7, 29.2, 55.4, 113.4, 126.4 (q,  $J$  = 280.2 Hz), 127.7 (q,  $J$  = 2.5 Hz), 137.2, 146.5 (q,  $J$  = 28.1 Hz), 157.9, 168.9 (q,  $J$  = 6.6 Hz); <sup>19</sup>F NMR (CDCl<sub>3</sub>)  $\delta$  = -49.46 (s, 3F); IR (neat) 2956, 2923, 2872, 1606, 1503, 1464, 1282, 1236, 1187, 1137, 1098, 1039, 962, 842, 760, 618 cm<sup>-1</sup>; HRMS (FAB) calcd for (M-H) C<sub>25</sub>H<sub>42</sub>F<sub>3</sub>OSiSn: 563.1979, found 563.2133.

**(Z)-3,3,3-Trifluoro-1-(3-methoxyphenyl)-2-tributylstannyl-1-trimethylsilyl-1-propene (3b)**

Isolated yield : 87% (Eluent of silica gel column chromatography; Hexane only. This compound was isolated as a mixture of the regioisomer **2b** and **3b**.)

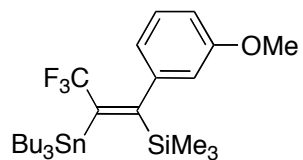

(Major isomer);  $^1\text{H NMR}$  ( $\text{CDCl}_3$ )  $\delta$  = 0.07 (s, 9H), 0.79 – 1.57 (m, 27H), 3.78 (s, 3H), 6.30 – 6.46 (m, 2H), 6.60 – 6.75 (m, 1H), 7.10 – 7.20 (m, 1H);  $^{13}\text{C NMR}$  ( $\text{CDCl}_3$ )  $\delta$  = 0.3, 13.2 – 13.3 (m, 1C), 13.6, 27.3, 28.8, 55.1, 110.6, 112.1, 118.9, 126.3 (q,  $J$  = 280.2 Hz), 128.3, 145.4 (q,  $J$  = 28.1 Hz), 146.2, 158.8, 168.0 (q,  $J$  = 6.6 Hz);  $^{19}\text{F NMR}$  ( $\text{CDCl}_3$ )  $\delta$  = -49.61 (s, 3F); IR (neat) 2957, 2923, 2873, 1730, 1598, 1464, 1377, 1284, 1230, 1137, 1099, 1051, 995, 976, 841, 770, 699, 628  $\text{cm}^{-1}$ ; HRMS (FAB) calcd for (M+H)  $\text{C}_{25}\text{H}_{44}\text{F}_3\text{OSiSn}$ : 565.2135, found 565.2143.

**(Z)-3,3,3-Trifluoro-1-(2-methoxyphenyl)-2-tributylstannyl-1-trimethylsilyl-1-propene (3c)**

Isolated yield : 86% (Eluent of silica gel column chromatography; Hexane : EtOAc = 30 : 1. This compound was isolated as a mixture of the regioisomer **2c** and **3c**.)

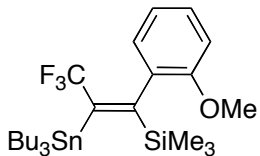

(Major isomer);  $^1\text{H NMR}$  ( $\text{CDCl}_3$ )  $\delta$  = 0.02 (s, 9H), 0.82 – 1.60 (m, 27H), 3.74 (s, 3H), 6.70 – 6.90 (m, 3H), 7.10 – 7.20 (m, 1H);  $^{13}\text{C NMR}$  ( $\text{CDCl}_3$ )  $\delta$  = 0.2, 13.1 – 13.2 (m, 1C), 13.7, 27.3, 28.9, 54.9, 109.6, 119.8, 126.1 (q,  $J$  = 279.4 Hz), 126.6 – 126.7 (m, 1C), 127.0, 134.3, 145.1 (q,  $J$  = 28.9 Hz), 154.7, 165.7 (q,  $J$  = 7.4 Hz);  $^{19}\text{F NMR}$  ( $\text{CDCl}_3$ )  $\delta$  = -51.16 (s, 3F); IR (neat)  $\nu$  2957, 2924, 1731, 1596, 1484, 1377, 1231, 1174, 1136, 1105, 1049, 960, 842, 751  $\text{cm}^{-1}$ ; HRMS (FAB) calcd for (M+H)  $\text{C}_{25}\text{H}_{44}\text{F}_3\text{OSiSn}$ : 565.2135, found 565.2129.

**(Z)-1-(4-Chlorophenyl)-3,3,3-trifluoro-2-tributylstannyl-1-trimethylsilyl-1-propene (3d)**

Isolated yield : 90% (Eluent of silica gel column chromatography; Hexane : EtOAc = 30 : 1. This compound was isolated as a mixture of the regioisomer **2d** and **3d**.)

(Major isomer);  $^1\text{H NMR}$  ( $\text{CDCl}_3$ )  $\delta$  0.06 (s, 9H), 0.80 – 1.60 (m, 18H), 0.93 (t,  $J$  = 7.39 Hz, 9H), 6.78 (d,  $J$  = 8.4 Hz, 2H), 7.23 (d,  $J$  = 8.4 Hz, 2H);  $^{13}\text{C NMR}$  ( $\text{CDCl}_3$ )  $\delta$  1.1, 14.0 (q,  $J$  = 1.7 Hz), 14.3, 28.0, 29.5, 125.01 (q,  $J$  = 283.5 Hz), 126.4 (q,  $J$  = 2.5 Hz), 128.3, 132.1, 143.9, 147.5 (q,  $J$  = 28.6

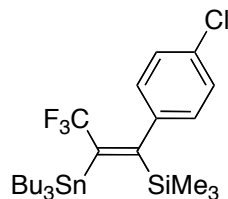

(Hz), 167.8 (q,  $J = 7.2$  Hz);  $^{19}\text{F}$  NMR ( $\text{CDCl}_3$ )  $\delta$   $-49.54$  (s, 3F); IR (neat)  $\nu$  2957, 2855, 1547, 1484, 1465, 1420, 1377, 1232, 1184, 1139, 1095, 1015, 962  $\text{cm}^{-1}$ ; HRMS (FAB) calcd for ( $\text{M}+\text{Na}$ )  $\text{C}_{24}\text{H}_{40}\text{ClF}_3\text{NaSiSn}$ : 591.1460, found 591.1459.

### (Z)-Ethyl 4-(3,3,3-trifluoro-2-tributylstannyl-1-trimethylsilyl-1-propen-1-yl)benzoate (3e)

Isolated yield : 90% (Eluent of silica gel column chromatography; Hexane : EtOAc = 30 : 1. This compound was isolated as a mixture of the regioisomer 2e and 3e.)

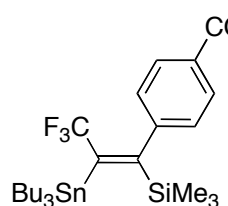

(Major isomer);  $^1\text{H}$  NMR ( $\text{CDCl}_3$ )  $\delta$  = 0.06 (s, 9H), 0.80 – 1.60 (m, 30H), 4.36 (q,  $J = 7.2$  Hz, 2H), 6.92 (d,  $J = 8.0$  Hz, 2H), 7.94 (d,  $J = 8.0$  Hz, 2H);  $^{13}\text{C}$  NMR ( $\text{CDCl}_3$ )  $\delta$  = 1.4, 14.2 – 14.3 (m 1C), 14.6, 15.3, 28.3, 29.8, 61.8, 125.2 (d,  $J = 2.5$  Hz), 126.9 (q,  $J = 280.2$  Hz), 127.1 – 127.2 (m, 1C), 129.8, 147.3 (q,  $J = 28.9$  Hz), 151.1, 167.6, 168.3 (q,  $J = 6.9$  Hz);  $^{19}\text{F}$  NMR ( $\text{CDCl}_3$ )  $\delta$  =  $-49.65$  (s, 3F); IR (neat) 2957, 2924, 2873, 1719, 1605, 1464, 1403, 1282, 1251, 1232, 1175, 1139, 1097, 1021, 951, 844, 749, 705, 618  $\text{cm}^{-1}$ ; HRMS (FAB) calcd for ( $\text{M}+\text{H}$ )  $\text{C}_{27}\text{H}_{46}\text{F}_3\text{O}_2\text{SiSn}$ : 607.2241, found 607.2241.

### (Z)-1-(4-Chlorophenyl)-4,4,4-Trifluoro-2-tributylstannyl-3-trimethylsilyl-2-buten-1-ol (2h)

Isolated yield : 25%. (Eluent of silica gel column chromatography; Hexane : Benzene = 3 : 1.)

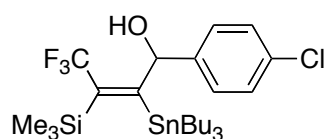

(Minor isomer);  $^1\text{H}$  NMR ( $\text{CDCl}_3$ )  $\delta$  = 0.26 (s, 9H), 0.58 – 0.75 (m, 6H), 0.76 (t,  $J = 7.2$  Hz, 9H), 1.10 – 1.27 (m, 12H), 2.42 (d,  $J = 4.0$  Hz, 1H), 5.79 (s, 1H), 7.14 – 7.25 (m, 4H);  $^{13}\text{C}$  NMR ( $\text{CDCl}_3$ )  $\delta$  = 1.0, 13.2, 14.3, 27.1, 28.5, 74.6 – 74.7 (m, 1C), 124.8 (q,  $J = 284.1$  Hz), 127.8, 132.8, 138.9, 142.0 (q,  $J = 24.8$  Hz), 162.5, 177.4 (q,  $J = 4.1$  Hz);  $^{19}\text{F}$  NMR ( $\text{CDCl}_3$ )  $\delta$  =  $-49.96$  (s, 3F); IR (neat) 3610, 3466, 2957, 2923, 2872, 1726, 1671, 1597, 1538, 1491, 1464, 1400, 1377, 1254, 1222, 1141, 1106, 1015, 961, 920, 840, 801, 767  $\text{cm}^{-1}$ .

### (Z)-1-(4-Chlorophenyl)-4,4,4-trifluoro-3-tributylstannyl-2-trimethylsilyl-2-buten-1-ol (3h)

Isolated yield : 69%. (Eluent of silica gel column chromatography; Hexane : Benzene = 3 : 1.)

(Major isomer);  $^1\text{H}$  NMR ( $\text{CDCl}_3$ )  $\delta$  = 0.0 (s, 9H), 0.93 (t,  $J = 7.4$  Hz, 9H), 1.05 – 1.55 (m, 18H), 2.27 (d,  $J = 4.8$  Hz, 1H), 5.94 (s, 1H), 7.24 – 7.31

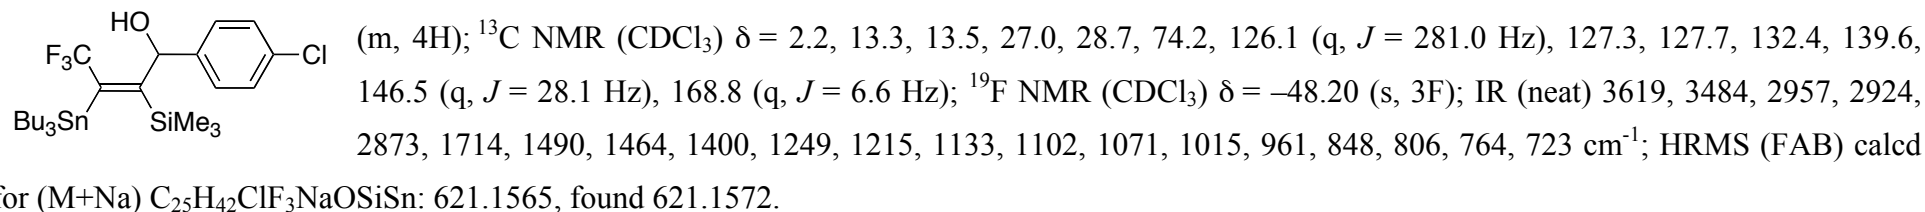

### (Z)-1,1,1-Trifluoro-6-phenyl-3-tributylstannyl-2-trimethylsilyl-2,5-hexadien-4-ol (2i)

Isolated yield : 23%. (Eluent of silica gel column chromatography; Hexane : Benzene = 2 : 1.)

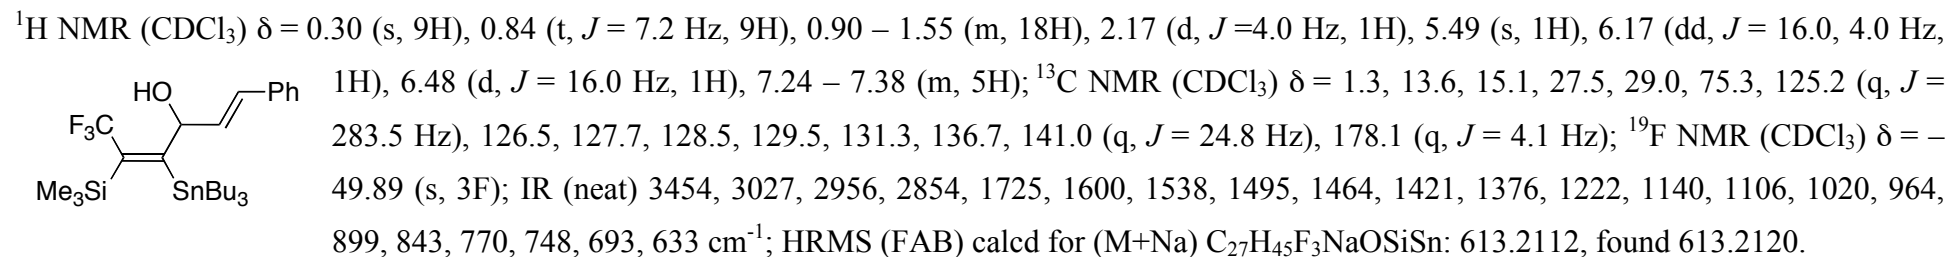

### (Z)-1,1,1-Trifluoro-6-phenyl-2-tributylstannyl-3-trimethylsilyl-2,5-hexadien-4-ol (3i)

Isolated yield : 52%. (Eluent of silica gel column chromatography; Hexane : Benzene = 2 : 1.)

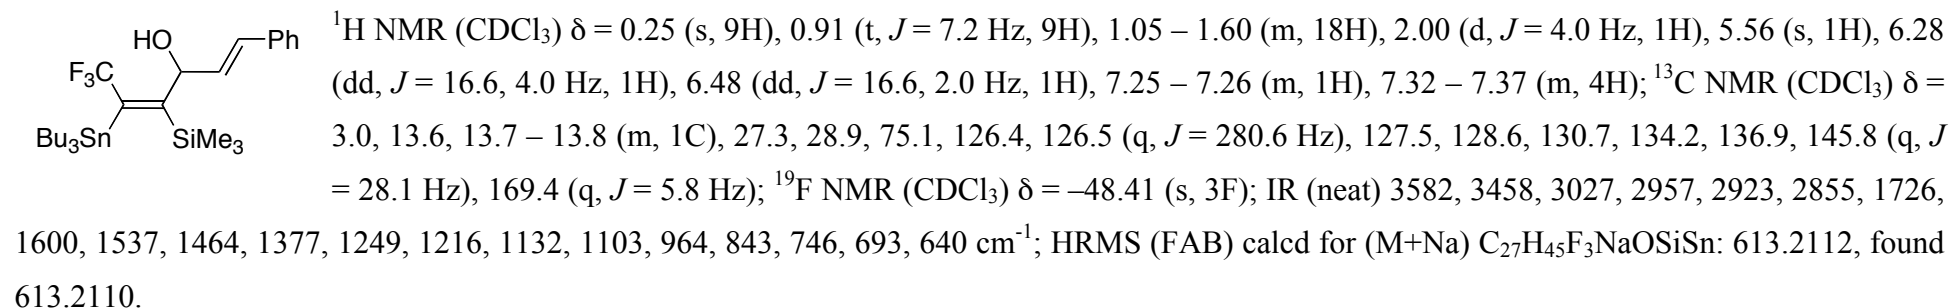

### (Z)-1,1,1-Trifluoro-3-tributylstannyl-2-trimethylsilyl-2-decen-4-ol (2j)

Isolated yield : 30%. (Eluent of silica gel column chromatography; Hexane : EtOAc = 30 : 1.)

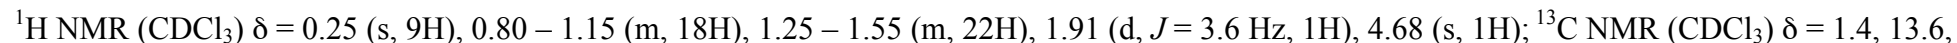



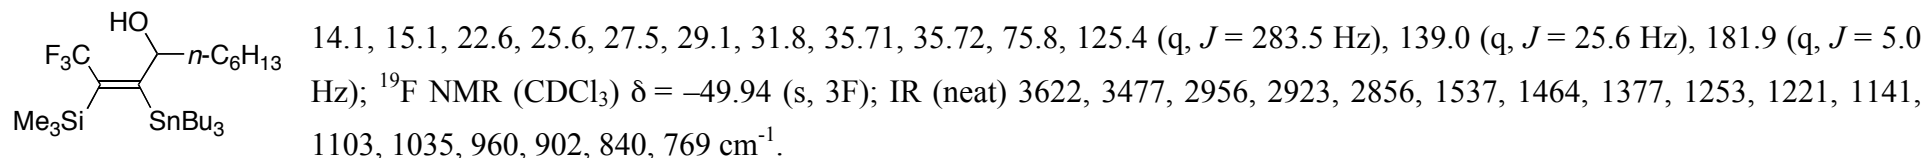

**(Z)-1,1,1-Trifluoro-2-tributylstannyl-3-trimethylsilyl-2-decen-4-ol (3j)**

Isolated yield : 35%. (Eluent of silica gel column chromatography; Hexane : EtOAc = 30 : 1.)

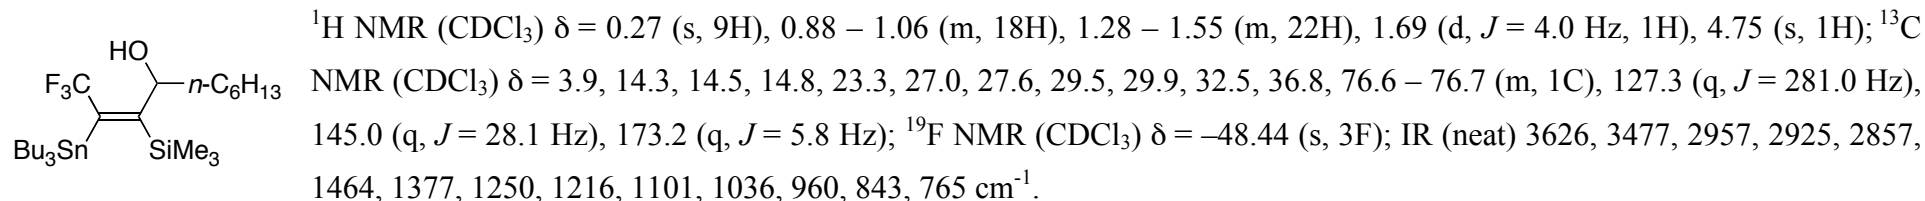

**(Z)-1,1,1-Trifluoro-4-Methoxymethoxy-3-tributylstannyl-2-trimethylsilyl-2-decene (2k)**

Isolated yield : 49%. (Eluent of silica gel column chromatography; Hexane : Benzene = 5 : 1.)

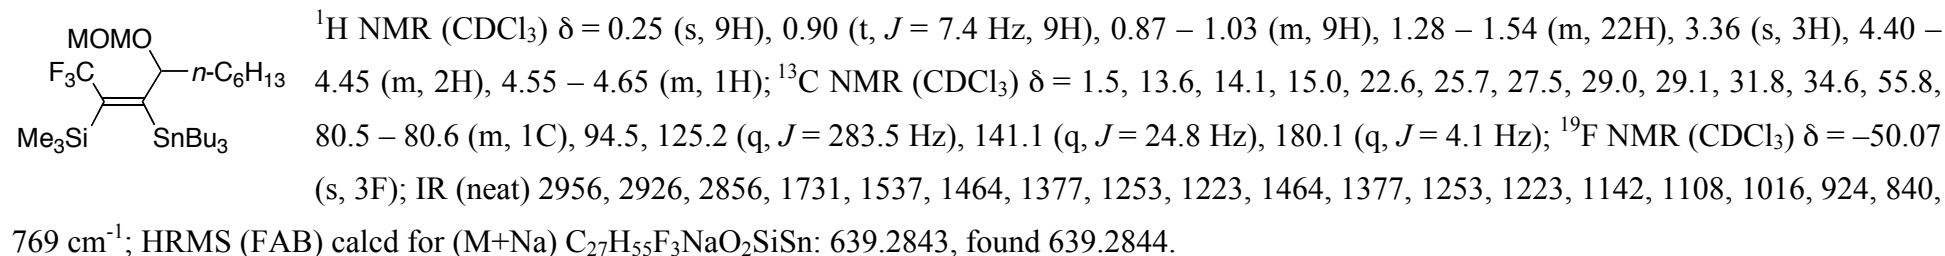

**(Z)-1,1,1-Trifluoro-4-methoxymethoxy-2-tributylstannyl-3-trimethylsilyl-2-decene (3k)**

Isolated yield : 36%. (Eluent of silica gel column chromatography; Hexane : Benzene = 5 : 1.)

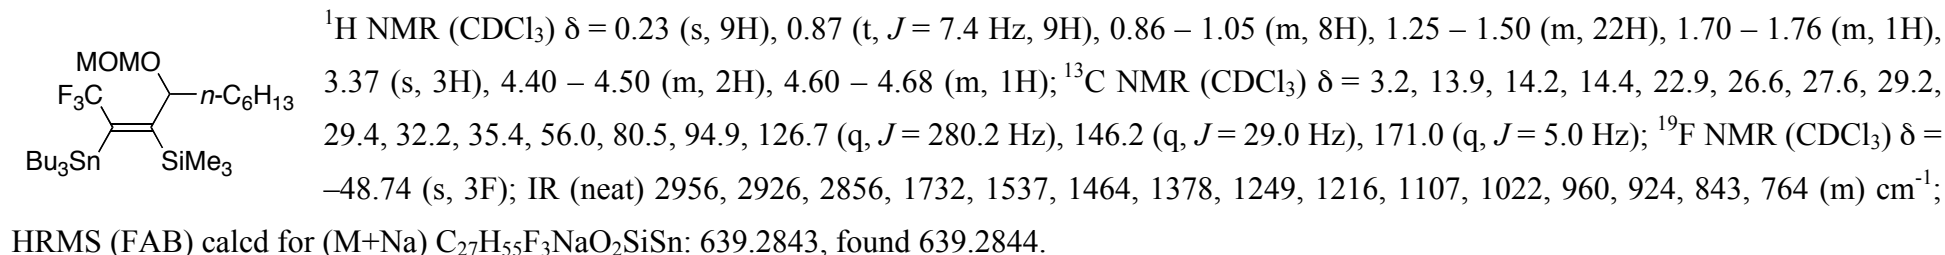

**Procedure for silylstannylation of 4-methoxymethoxy-1,1,1-trifluorodecyne (Condition B):** To a solution of 4-methoxymethoxy-1,1,1-trifluorodecyne (0.063 g, 0.25 mmol) and Pd(*t*-BuNC)<sub>2</sub>Cl<sub>2</sub> (0.002 g, 0.00625 mmol, 2.5 mol%) in THF (2.5 mL) was added a THF solution of dimethylphenyl(tributylstannyl)silane (0.128 g, 0.30 mmol) at room temperature. The reaction was stirred for 6 h at room temperature. The resulting mixture was then quenched with H<sub>2</sub>O. The reaction mixture was extracted with Et<sub>2</sub>O three times. The combined organic layers were dried over anhydrous Na<sub>2</sub>SO<sub>4</sub> and concentrated in *vacuo*. Purification of the residue oil by flash chromatography five times, and concentrated in *vacuo*. The residue was chromatographed on silica gel (hexane: EtOAc = 30 : 1) to afford the corresponding silylstannylated product **2l** and **3l** (0.106 g, 0.15 mmol, 62%).

**(Z)-2-Dimethylphenylsilyl-1,1,1-trifluoro-4-methoxymethoxy-3-tributylstannyl-2-decene (2k)**

Isolated yield : 28%. (Eluent of silica gel column chromatography; Hexane : Benzene = 3 : 1.)

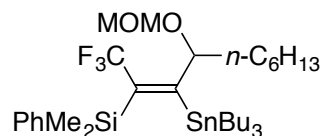

(Minor isomer); <sup>1</sup>H NMR (CDCl<sub>3</sub>) δ = 0.47 (s, 3H), 0.50 (s, 3H), 0.84 (t, *J* = 7.2 Hz, 9H), 0.85 – 0.99 (m, 9H), 1.18 – 1.64 (m, 22H), 3.39 (s, 3H), 4.49 (d, *J* = 6.8 Hz, 1H), 4.53 (d, *J* = 6.8 Hz, 1H), 4.68 – 4.75 (m, 1H), 7.32 – 7.35 (m, 3H), 7.47 – 7.50 (m, 2H); <sup>13</sup>C NMR (CDCl<sub>3</sub>) δ = 1.2, 1.3, 13.6, 14.1, 14.9, 22.6, 25.7, 27.4, 28.9, 29.1, 31.8, 34.8, 55.8, 80.7, 94.6 – 94.7 (m, 1C), 124.9 (q, *J* = 284.3 Hz), 127.8, 129.1, 133.7, 138.3, 139.0 (q, *J* = 24.7 Hz), 183.7 (q, *J* = 4.1 Hz); <sup>19</sup>F NMR

(CDCl<sub>3</sub>) δ = –49.48 (s, 3F); IR (neat) 3070, 2955, 2856, 1731, 1534, 1464, 1377, 1224, 1110, 1016, 924, 812, 697 cm<sup>-1</sup>; HRMS (FAB) calcd for (M-H) C<sub>32</sub>H<sub>56</sub>F<sub>3</sub>O<sub>2</sub>SiSn: 677.3024, found 677.3030.

**(Z)-3-Dimethylphenylsilyl-1,1,1-trifluoro-4-methoxymethoxy-2-tributylstannyl-2-decene (3k)**

Isolated yield : 34%. (Eluent of silica gel column chromatography; Hexane : Benzene = 3 : 1.)

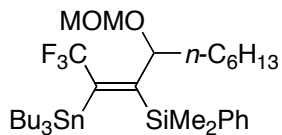

(Major isomer); <sup>1</sup>H NMR (CDCl<sub>3</sub>) δ = 0.43 (s, 3H), 0.45 (s, 3H), 0.60 – 0.68 (m, 6H), 0.81 (t, *J* = 7.0 Hz, 9H), 0.88 (t, *J* = 6.8 Hz, 3H), 1.16 – 1.40 (m, 19H), 1.48 – 1.56 (m, 2H), 1.76 – 1.80 (m, 1H), 3.38 (s, 3H), 4.49 (d, *J* = 6.8 Hz, 1H), 4.62 (d, *J* = 6.8 Hz, 1H), 4.75 – 4.85 (m, 1H), 7.30 – 7.35 (m, 3H), 7.47 – 7.49 (m, 2H); <sup>13</sup>C NMR (CDCl<sub>3</sub>) δ = 1.6, 4.2, 13.5, 13.7, 14.1, 22.6, 26.2, 27.2, 28.8, 29.1, 31.8, 35.2, 55.7, 80.1, 94.7 – 94.80 (m, 1C), 126.3 (q, *J* = 281.8 Hz), 128.0, 128.9, 134.2,

139.4, 149.2 (q, *J* = 28.1 Hz), 167.1 (q, *J* = 5.8 Hz); <sup>19</sup>F NMR (CDCl<sub>3</sub>) δ = –48.39 (s, 3F); IR (neat) 2956, 2856, 1731, 1464, 1377, 1214, 1109, 1022,

823, 820, 729, 702  $\text{cm}^{-1}$ ; HRMS (FAB) calcd for (M-H)  $\text{C}_{32}\text{H}_{56}\text{F}_3\text{O}_2\text{SiSn}$ : 677.3024, found 677.3027.

**Destannylation of (Z)-3,3,3-trifluoro-1-(4-methoxyphenyl)-1-tributylstannyl-2-trimethylsilyl-1-propene (2a) and (Z)-3,3,3-trifluoro-1-(4-methoxyphenyl)-2-tributylstannyl-1-trimethylsilyl-1-propene (3a):** To a solution of the isomeric mixture of **2a** and **3a** (0.113 g, 0.20 mmol, **2a** : **3a** = 22 : 78) in MeOH (2 mL) was added PPTS (1.0 mL, 6.0 mmol) at room temperature. The reaction was stirred for 52 h at the reflux temperature. The resulting mixture was neutralized with  $\text{NaHCO}_3$  aq. (20 mL of sat. and 10 mL of water) and extracted with  $\text{Et}_2\text{O}$  (2×30 mL). The combined organic layers were dried over anhydride  $\text{Na}_2\text{SO}_4$  and concentrated in *vacuo*. The residue was chromatographed on silica gel (Hexane: EtOAc = 5 : 1) to afford the products **5a** and **6a** (0.052g, 0.19 mmol, 95%).

**5a** or **6a** could not be isolated in a pure form. They were obtained as a regioisomeric mixture in a ratio of 19 : 81.

**(E)-3,3,3-Trifluoro-1-(4-methoxyphenyl)-2-trimethylsilyl-1-propene (5a)** (Only observed peaks are shown.)

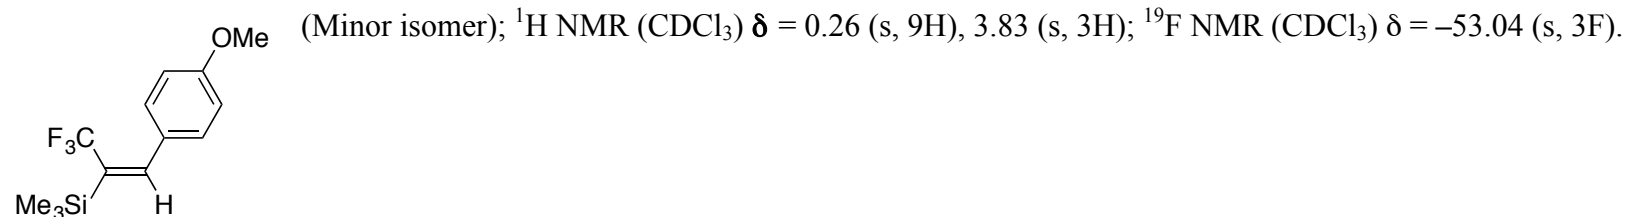

**(E)-3,3,3-Trifluoro-1-(4-methoxyphenyl)-1-trimethylsilyl-1-propene (6a)**

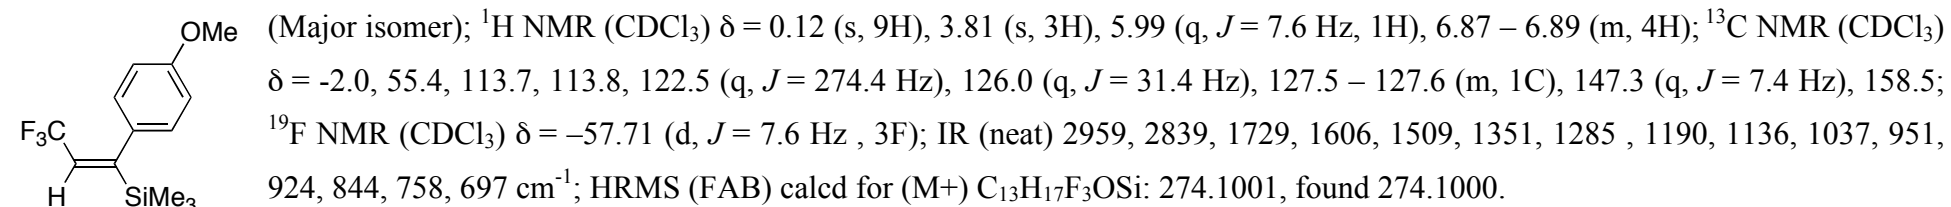

**Typical procedure for the Stille coupling reaction of vinylstannane 2k with iodobenzene:** To a solution of  $\text{Pd}(\text{PPh}_3)_4$  (0.032 g, 0.028 mmol, 10 mol%) in toluene (3.0 mL) were added silylstannylated adduct **2k** (0.169 g, 0.25 mmol), CuI (0.010 g, 0.052 mmol), and iodobenzene (0.042 mL,

0.375 mmol), and then the reaction mixture was heated to 80 °C. After stirred at 80 °C for 24 h, the reaction was quenched with NH<sub>4</sub>Cl. The reaction mixture was extracted with Et<sub>2</sub>O three times. The combined organic layers were dried over anhydrous Na<sub>2</sub>SO<sub>4</sub> and filtered and stirred with 20% of aqueous KF (10 mL) for 30 min before being dried and concentrated. The residue was chromatographed on silica gel (Hexane: EtOAc = 10 : 1) to afford (*Z*)-1,1,1-trifluoro-4-methoxymethoxy-2-phenyl-3-trimethylsilyl-2-decene (**7k**).

**(*Z*)-1,1,1-Trifluoro-4-methoxymethoxy-3-phenyl-2-trimethylsilyl-2-decene (7k)**

<sup>19</sup>F NMR yield : 88%, Isolated yield : 86%, <sup>1</sup>H NMR (CDCl<sub>3</sub>) δ = -0.20 (s, 9H), 0.85 (t, *J* = 7.2 Hz, 3H), 1.23 – 1.45 (m, 10H), 3.40 (s, 3H), 4.58 (d, *J* = 6.6 Hz, 1H), 4.78 (d, *J* = 6.6 Hz, 1H), 4.85 – 4.90 (m, 1H), 7.04 – 7.05 (m, 1H), 7.06 – 7.16 (m, 1H), 7.29 – 7.36 (m, 3H); <sup>13</sup>C NMR (CDCl<sub>3</sub>) δ = 0.4, 13.9, 22.5, 25.8, 28.9, 31.7, 34.1, 55.7, 76.1, 94.5, 126.2 (q, *J* = 277.8 Hz), 127.4, 127.6, 128.1, 129.8, 129.9, 132.8 (q, *J* = 27.2 Hz), 138.5, 162.9 (q, *J* = 5.2 Hz); <sup>19</sup>F NMR (CDCl<sub>3</sub>) δ = -49.64 (s, 3F); IR (neat) 2930, 2859, 1730, 1586, 1467, 1378, 1244, 1137, 1113, 1025, 921, 846, 769, 703 cm<sup>-1</sup>; HRMS (FAB) calcd for (M+Na) C<sub>21</sub>H<sub>33</sub>F<sub>3</sub>NaO<sub>2</sub>Si: 425.2100, found 425.2095.

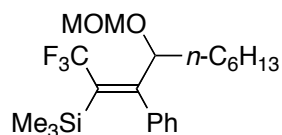

**(*E*)-1,1,1-Trifluoro-4-methoxymethoxy-2-phenyl-3-trimethylsilyl-2-decene (8k)**

<sup>19</sup>F NMR yield : 91%, Isolated yield : 91%, <sup>1</sup>H NMR (CDCl<sub>3</sub>) δ = -0.17 (s, 9H), 0.91 (t, *J* = 6.8 Hz, 3H), 1.20 – 1.40 (m, 9H), 1.75 – 1.90 (m, 1H), 3.43 (s, 3H), 4.56 (d, *J* = 6.8 Hz, 1H), 4.68 (d, *J* = 6.8 Hz, 1H), 4.80 – 4.90 (m, 1H), 7.15 – 7.16 (m, 2H), 7.33 – 7.35 (m, 3H); <sup>13</sup>C NMR (CDCl<sub>3</sub>) δ = 2.1, 14.1, 22.6, 26.3, 29.1, 31.8, 35.5, 55.8, 78.0, 95.0 – 95.1 (m, 1C), 122.7 (q, *J* = 279.4 Hz), 127.8, 127.9, 128.4, 130.5, 130.6, 136.0 140.6 (q, *J* = 28.9 Hz), 154.9; <sup>19</sup>F NMR (CDCl<sub>3</sub>) δ = -55.48 (s, 3F); IR (neat) 2955, 2930, 2859, 1729, 1467, 1380, 1290, 1249, 1200, 1164, 1117, 1024, 923, 844, 765, 704, 671 cm<sup>-1</sup>; HRMS (FAB) calcd for (M+Na) C<sub>21</sub>H<sub>33</sub>F<sub>3</sub>NaO<sub>2</sub>Si: 425.2100, found 425.2105.

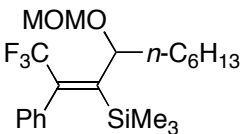

**The coupling reaction of (*Z*)-2-trimethylsilyl-1,1,1-trifluoro-4-methoxymethoxy-3-phenyl-2-decene (**7k**) with 4-trifluoromethylbenzaldehyde:**

To a solution of **7k** (0.162 g, 0.40 mmol) in NMP (1.0 mL) were added 4-trifluoromethylbenzaldehyde (0.082 mL, 0.60 mmol), TBAF (0.04 mL, 20 mol%), and Zn(OTf)<sub>2</sub> (0.218g, 0.60 mmol), and then the reaction mixture was heated to 80 °C. After stirred at 80 °C for 24 h, the reaction was

quenched with cooled  $\text{NH}_4\text{Cl}$ . The reaction mixture was extracted with  $\text{Et}_2\text{O}$  five times. The combined organic layers were dried over anhydride  $\text{Na}_2\text{SO}_4$  and concentrated in *vacuo*. The residue was chromatographed on silica gel (Hexane: EtOAc = 5 : 1) to afford the product **9k** (0.080g, 0.158 mmol, 39% isolated yield, 54%  $^{19}\text{F}$  NMR yield).

**(Z)-4-Methoxymethoxy-3-phenyl-2-trifluoromethyl-1-(4-trifluoromethylphenyl)-2-decen-1-ol (9k)**

$^{19}\text{F}$  NMR yield : 54%, Isolated yield : 39%, (Major isomer : 21%, Minor isomer : 18%), Diastereomeric ratio = 54: 46 (The diastereomers could be separated by silica gel column chromatography.)

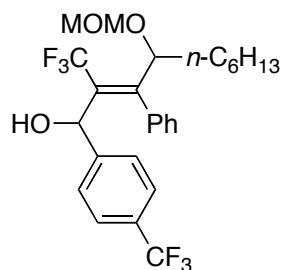

Major isomer (Less polar);  $^1\text{H}$  NMR ( $\text{CDCl}_3$ )  $\delta$  = 0.87 (t,  $J$  = 6.8 Hz, 3H), 1.20 – 1.56 (m, 10H), 2.25 (d,  $J$  = 8.0 Hz, 1H), 3.44 (s, 3H), 4.70 (d,  $J$  = 21.2 Hz, 1H), 4.89 (d,  $J$  = 6.8 Hz, 2H), 4.85 – 4.95 (m, 1H), 5.35 (d,  $J$  = 8.4 Hz, 1H), 7.20 – 7.25 (m, 2H), 7.36 – 7.43 (m, 5H), 7.58 (d,  $J$  = 8.4 Hz, 2H);  $^{13}\text{C}$  NMR ( $\text{CDCl}_3$ )  $\delta$  = 14.0, 22.6, 25.7, 28.9, 31.7, 33.7, 56.0, 71.6, 75.1, 95.1, 123.8 (q,  $J$  = 278.8 Hz), 124.1 (q,  $J$  = 271.4 Hz), 125.1, 125.31, 125.34, 125.38, 128.21, 128.29, 128.34, 128.45, 129.0, 129.5 (q,  $J$  = 32.2 Hz), 130.9 (q,  $J$  = 26.4 Hz), 135.3, 144.7, 153.3 (q,  $J$  = 3.3 Hz) (All aromatic carbons were detected.);  $^{19}\text{F}$  NMR ( $\text{CDCl}_3$ )  $\delta$  = -52.03 (s, 3F), -63.00 (s, 3F); IR (neat) 3448, 2931, 2859, 1726, 1413, 1327, 1258, 1122, 1067, 1027, 707  $\text{cm}^{-1}$ ; HRMS (FAB) calcd for (M+Na)  $\text{C}_{26}\text{H}_{30}\text{F}_6\text{NaO}_3$ : 527.1997, found 527.2001.

Minor isomer (More polar);  $^1\text{H}$  NMR ( $\text{CDCl}_3$ )  $\delta$  = 0.89 (t,  $J$  = 6.8 Hz, 3H), 1.20 – 1.75 (m, 10H), 2.20 – 2.30 (m, 1H), 3.41 (s, 3H), 4.61 (d,  $J$  = 6.8 Hz, 1H), 4.88 (d,  $J$  = 6.8 Hz, 1H), 4.93 – 4.95 (m, 1H), 5.31 (s, 1H), 7.00 – 7.20 (m, 2H), 7.30 – 7.50 (m, 5H), 7.55 – 7.65 (m, 2H);  $^{13}\text{C}$  NMR ( $\text{CDCl}_3$ )  $\delta$  = 14.0, 22.6, 25.9, 28.9, 31.8, 34.3, 56.0, 71.5, 74.5, 94.6, 123.8 (q,  $J$  = 278.5 Hz), 124.0 (q,  $J$  = 261.9 Hz), 125.2, 125.31, 125.35, 125.38, 127.8, 128.1, 128.3, 128.6, 128.8, 129.5 (q,  $J$  = 32.5 Hz), 130.9 (q,  $J$  = 26.4 Hz), 135.1, 145.0, 153.1 (q,  $J$  = 3.2 Hz) (All aromatic carbons were detected.);  $^{19}\text{F}$  NMR ( $\text{CDCl}_3$ )  $\delta$  = -51.96 (s, 3F), -63.01 (s, 3F); IR (neat) 3436, 2931, 2859, 1728, 1620, 1327, 1257, 1223, 1067, 1017, 921, 706  $\text{cm}^{-1}$ ; HRMS (FAB) calcd for (M+Na)  $\text{C}_{26}\text{H}_{30}\text{F}_6\text{NaO}_3$ : 527.1997, found 527.1993.

**(Z)-1-(4-Trifluoromethylphenyl)-3-methoxymethoxy-2-(2,2,2-trifluoro-1-phenyl-1-ethylidene)-1-nonanol (10k)**

$^{19}\text{F}$  NMR yield : 28%, Isolated yield : 15%, Diastereomeric ratio = 100: 0

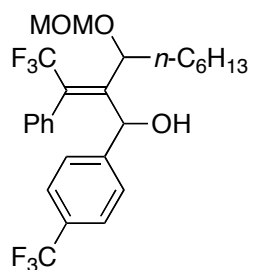

<sup>1</sup>H NMR (CDCl<sub>3</sub>) δ = 0.85 (t, *J* = 7.0 Hz, 3H), 1.00 – 1.50 (m, 10H), 3.49 (s, 3H), 4.68 (d, *J* = 6.4 Hz, 1H), 4.88 (d, *J* = 6.4 Hz, 1H), 4.88 – 4.94 (m, 1H), 5.50 (s, 1H), 7.12 – 7.61 (m, 10H); <sup>13</sup>C NMR (CDCl<sub>3</sub>) δ = 14.0, 22.5, 26.2, 28.8, 31.5, 35.9, 56.3, 72.7, 78.8, 96.5, 121.4 (q, *J* = 271.2 Hz), 123.2 (q, *J* = 276.1 Hz), 124.8 (q, *J* = 3.3 Hz), 125.8, 126.6, 126.9, 128.4, 128.6, 128.8, 129.1 (q, *J* = 33.1 Hz), 129.5, 129.6, 133.2 (q, *J* = 30.3 Hz), 133.5 (q, *J* = 1.7 Hz), 146.6, 148.3 (q, *J* = 2.5 Hz) (All aromatic carbons were detected.); <sup>19</sup>F NMR (CDCl<sub>3</sub>) δ = –55.13 (s, 3F), –63.00 (s, 3F); IR (neat) 3440, 2958, 2931, 2859, 1724, 1467, 1327, 1164, 1122, 1067, 1017, 764, 705 cm<sup>-1</sup>; HRMS (FAB) calcd for (M+Na) C<sub>26</sub>H<sub>30</sub>F<sub>6</sub>NaO<sub>3</sub>: 527.1997, found

527.2001.

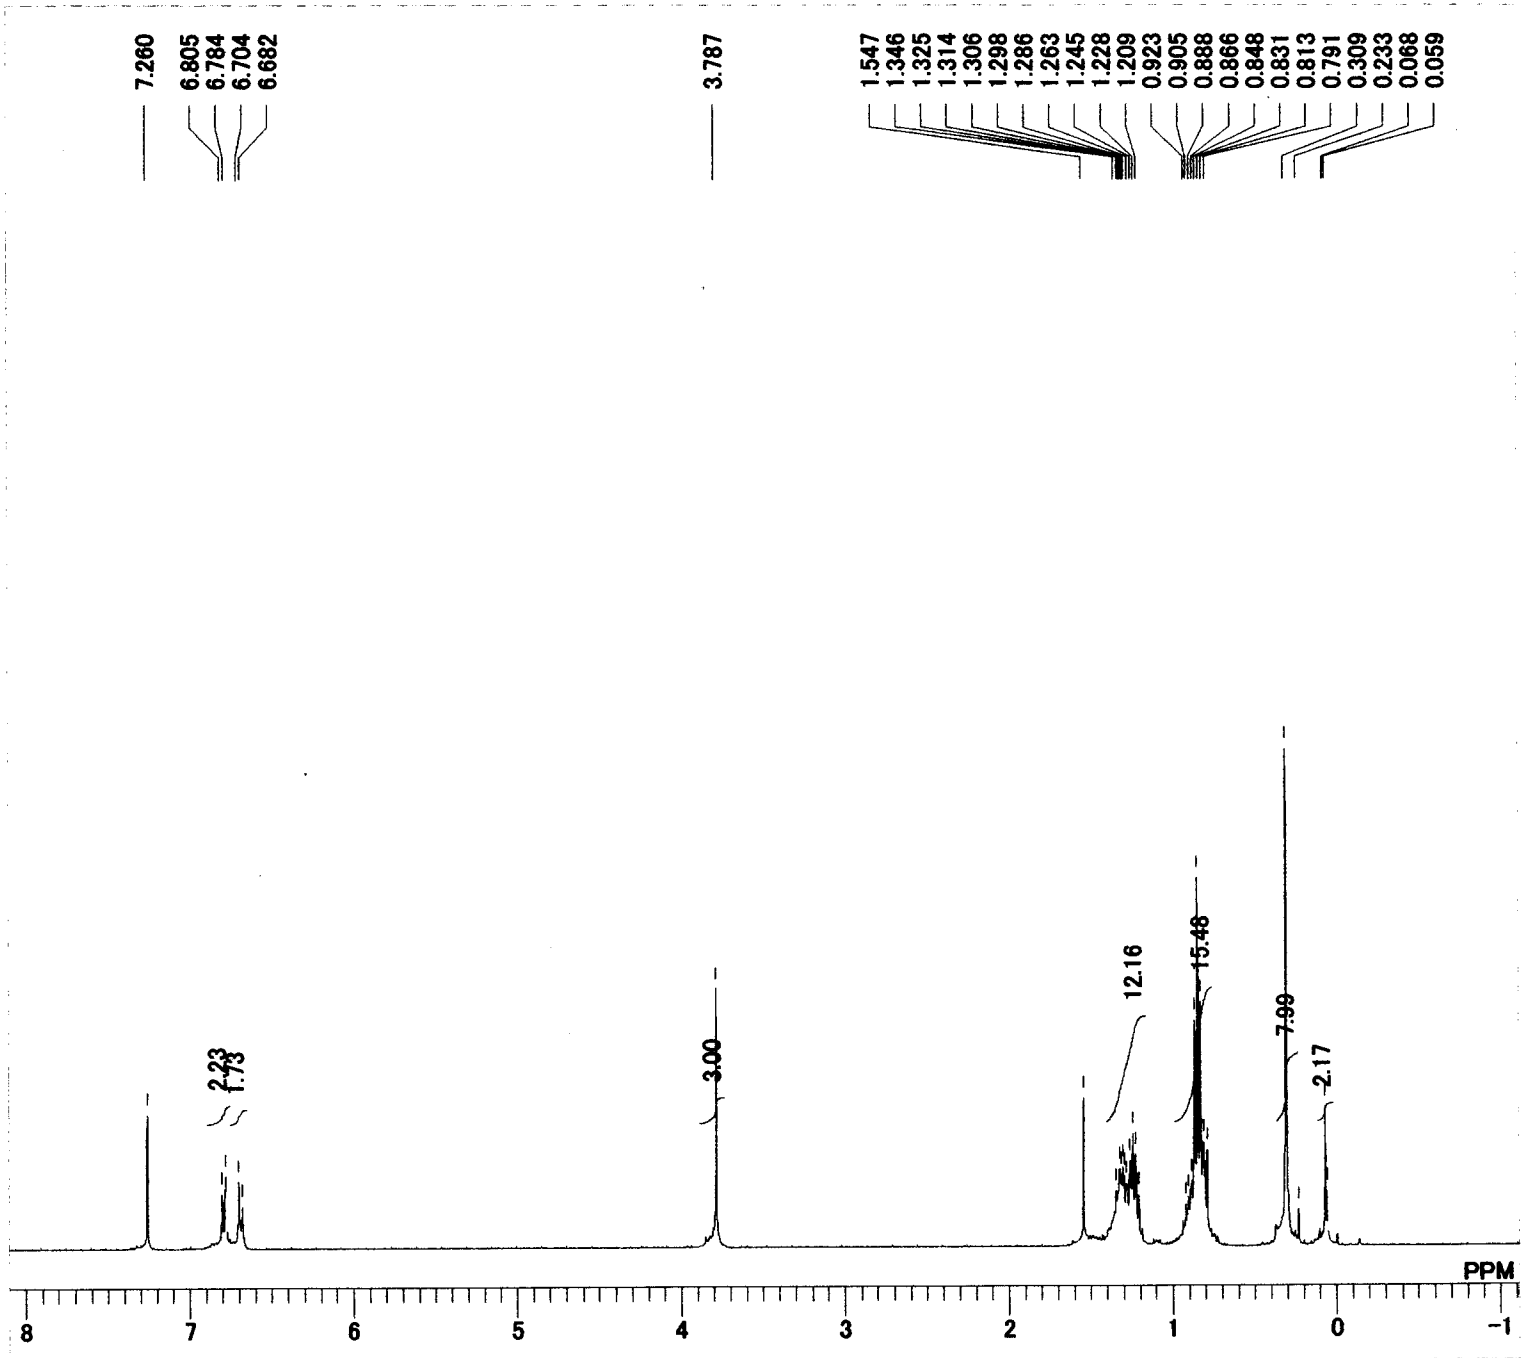

|       |                                 |
|-------|---------------------------------|
| MENUF | 1H                              |
| OBNUC | 1H                              |
| OFR   | 399.65 MHz                      |
| OBSET | 135.40 KHz                      |
| OBFIN | 24.90 Hz                        |
| PW1   | 5.80 usec                       |
| DEADT | 72.10 usec                      |
| PREDL | 0.20000 msec                    |
| IWT   | 1.0000 msec                     |
| POINT | 16384                           |
| SPO   | 16384                           |
| TIMES | 8                               |
| DUMMY | 1                               |
| FREQU | 7992.01 Hz                      |
| FLT   | 4000 Hz                         |
| DELAY | 50.00 usec                      |
| ACQTM | 2.0501 sec                      |
| PD    | 4.9500 sec                      |
| ADBIT | 16                              |
| RGAIN | 17                              |
| BF    | 0.10 Hz                         |
| T1    | 0.00                            |
| T2    | 0.00                            |
| T3    | 90.00                           |
| T4    | 100.00                          |
| EXMOD | NON                             |
| EXPCM | NON:Single.coupled:PW1_ACQTM_PC |
| IRNUC | 1H                              |
| IFR   | 399.65 MHz                      |
| IRSET | 136.90 KHz                      |
| IRFIN | 97.50 Hz                        |
| IRRPW | 45 usec                         |
| IRATN | 511                             |
| DFILE | Rxn.210 1H.als                  |
| SF    | TH5ATFG2                        |
| LKSET | 61.60 KHz                       |
| LKFIN | 79.0 Hz                         |
| LKLEV | 180                             |
| LGAIN | 23                              |
| LKPHS | 249                             |
| LKSIG | 695                             |
| CSPED | 14 Hz                           |
| FILDC |                                 |
| FILDF |                                 |

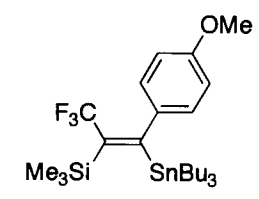

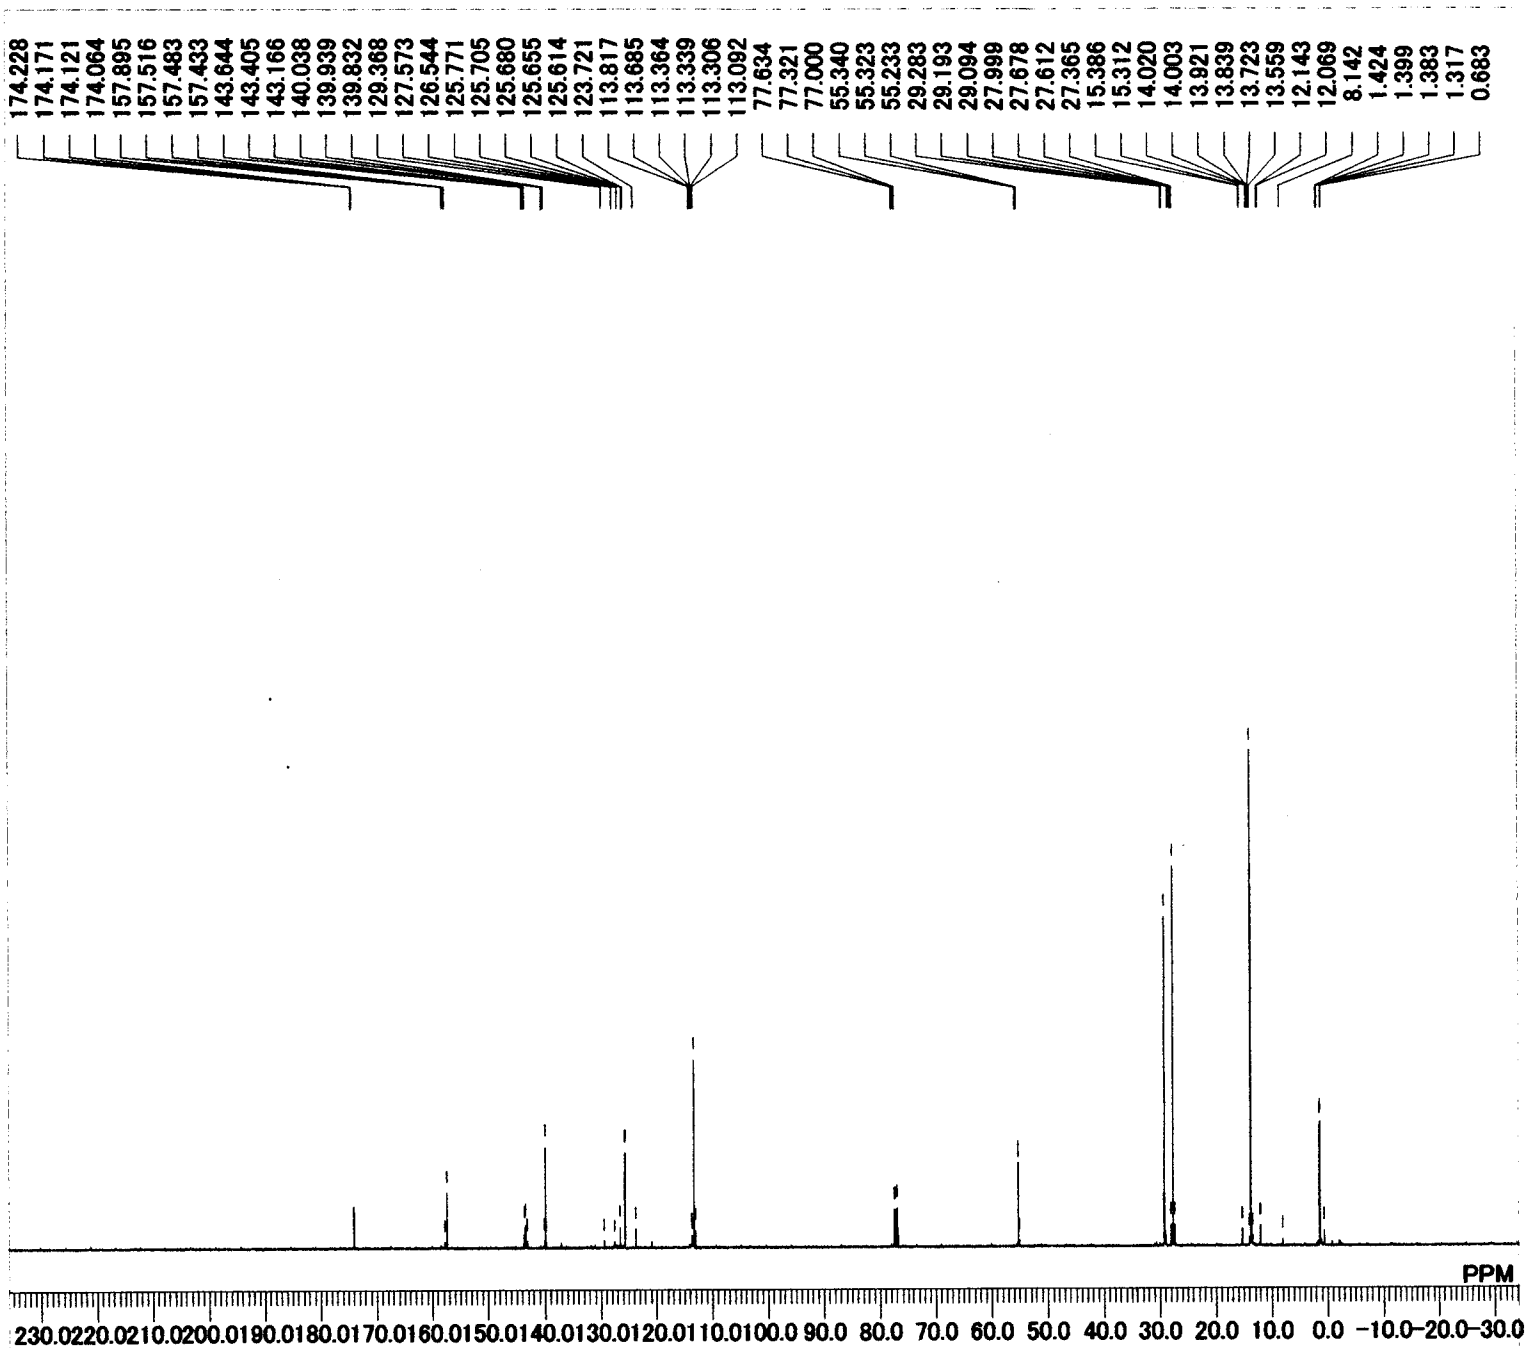

MENUF 13C  
 OBNUC 13C  
 OFR 100.40 MHz  
 OBSET 125.00 KHz  
 OBFIN 10500.00 Hz  
 PW1 6.20 usec  
 DEADT 19.00 usec  
 PREDL 0.20000 msec  
 IWT 1.0000 msec  
 POINT 32768  
 SPO 32768  
 TIMES 20000  
 DUMMY 1  
 FREQU 27118.64 Hz  
 FLT 13550 Hz  
 DELAY 14.80 usec  
 ACQTM 1.2083 sec  
 PD 1.7920 sec  
 ADBIT 16  
 RGAIN 22  
 BF 0.10 Hz  
 T1 0.00  
 T2 0.00  
 T3 90.00  
 T4 100.00  
 EXMOD BCM  
 EXPCM Bilevel.complete.decoupling.Set\_IRRF  
 IRNUC 1H  
 IFR 399.65 MHz  
 IRSET 124.00 KHz  
 IRFIN 10500.00 Hz  
 IRRPW 45 usec  
 IRATN 511  
 DFILE CF3-ph-p-OMe-Sn-Si (13C) Pd(PP  
 TH5ATFG2  
 LKSET 61.60 KHz  
 LKFIN 79.0 Hz  
 LKLEV 180  
 LGAIN 26  
 LKPHS 150  
 LKSIG 511  
 CSPED 10 Hz  
 FILDC  
 FILDF

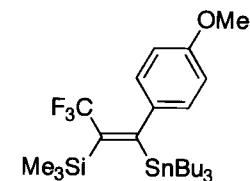



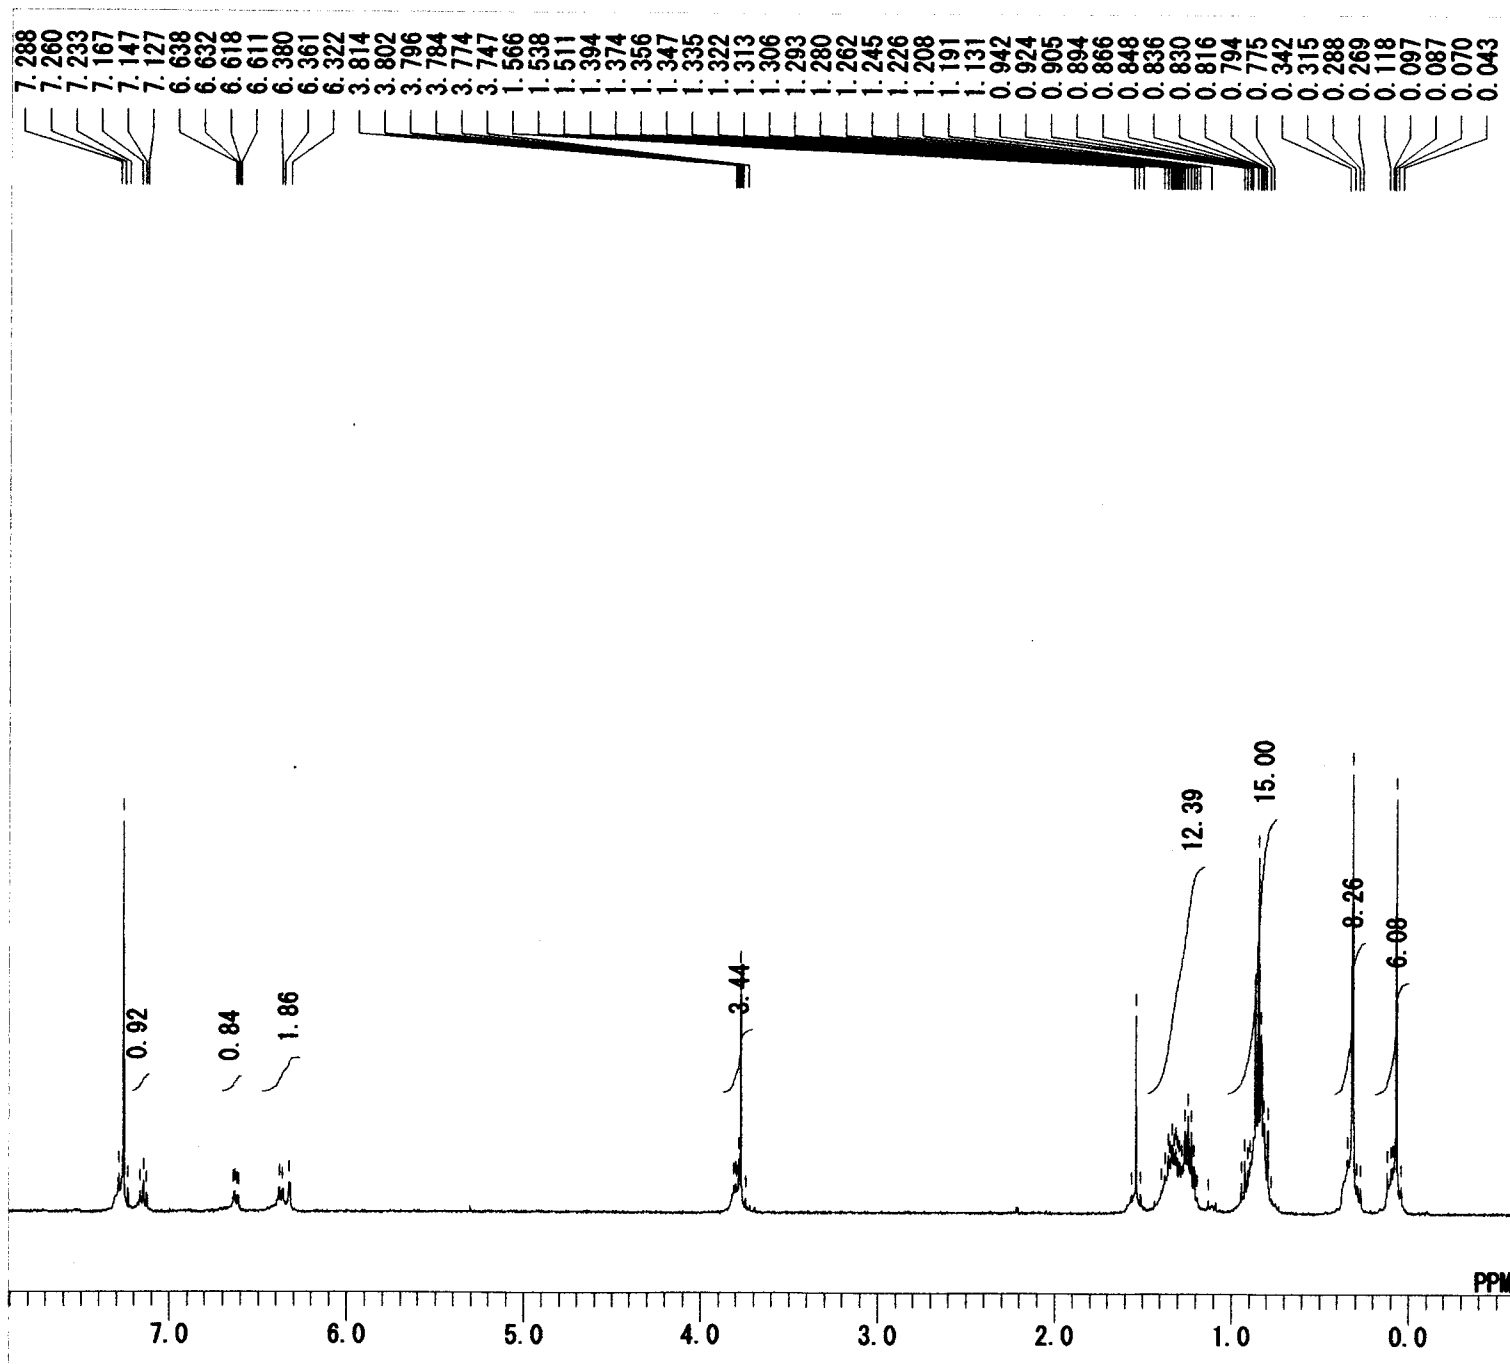

```

MENUF 1H
OBNUC 1H
OFR 399.65 MHz
OBSET 135.40 KHz
OBFIN 24.90 Hz
PW1 5.80 usec
DEADT 72.10 usec
PREDL 0.20000 msec
IWT 1.0000 msec
POINT 16384
SPO 16384
TIMES 8
DUMMY 1
FREQU 7992.01 Hz
FLT 4000 Hz
DELAY 50.00 usec
ACQTM 2.0501 sec
PD 4.9500 sec
ADBIT 16
RGAIN 21
BF 0.10 Hz
T1 0.00
T2 0.00
T3 90.00
T4 100.00
EXMOD NON
EXPCM NON:Single.coupled:PW1_ACQTM
IRNUC 1H
IFR 399.65 MHz
IRSET 136.90 KHz
IRFIN 97.50 Hz
IRRPW 45 usec
IRATN 511
DFILE Rxn.361 H.als
SF TH5ATFG2
LKSET 61.60 KHz
LKFIN 79.0 Hz
LKLEV 180
LGAIN 23
LKPHS 238
LKSIG 633
CSPED 11 Hz
FILDC
FILDF
    
```

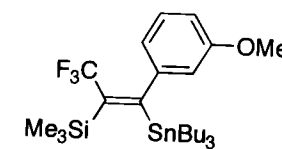

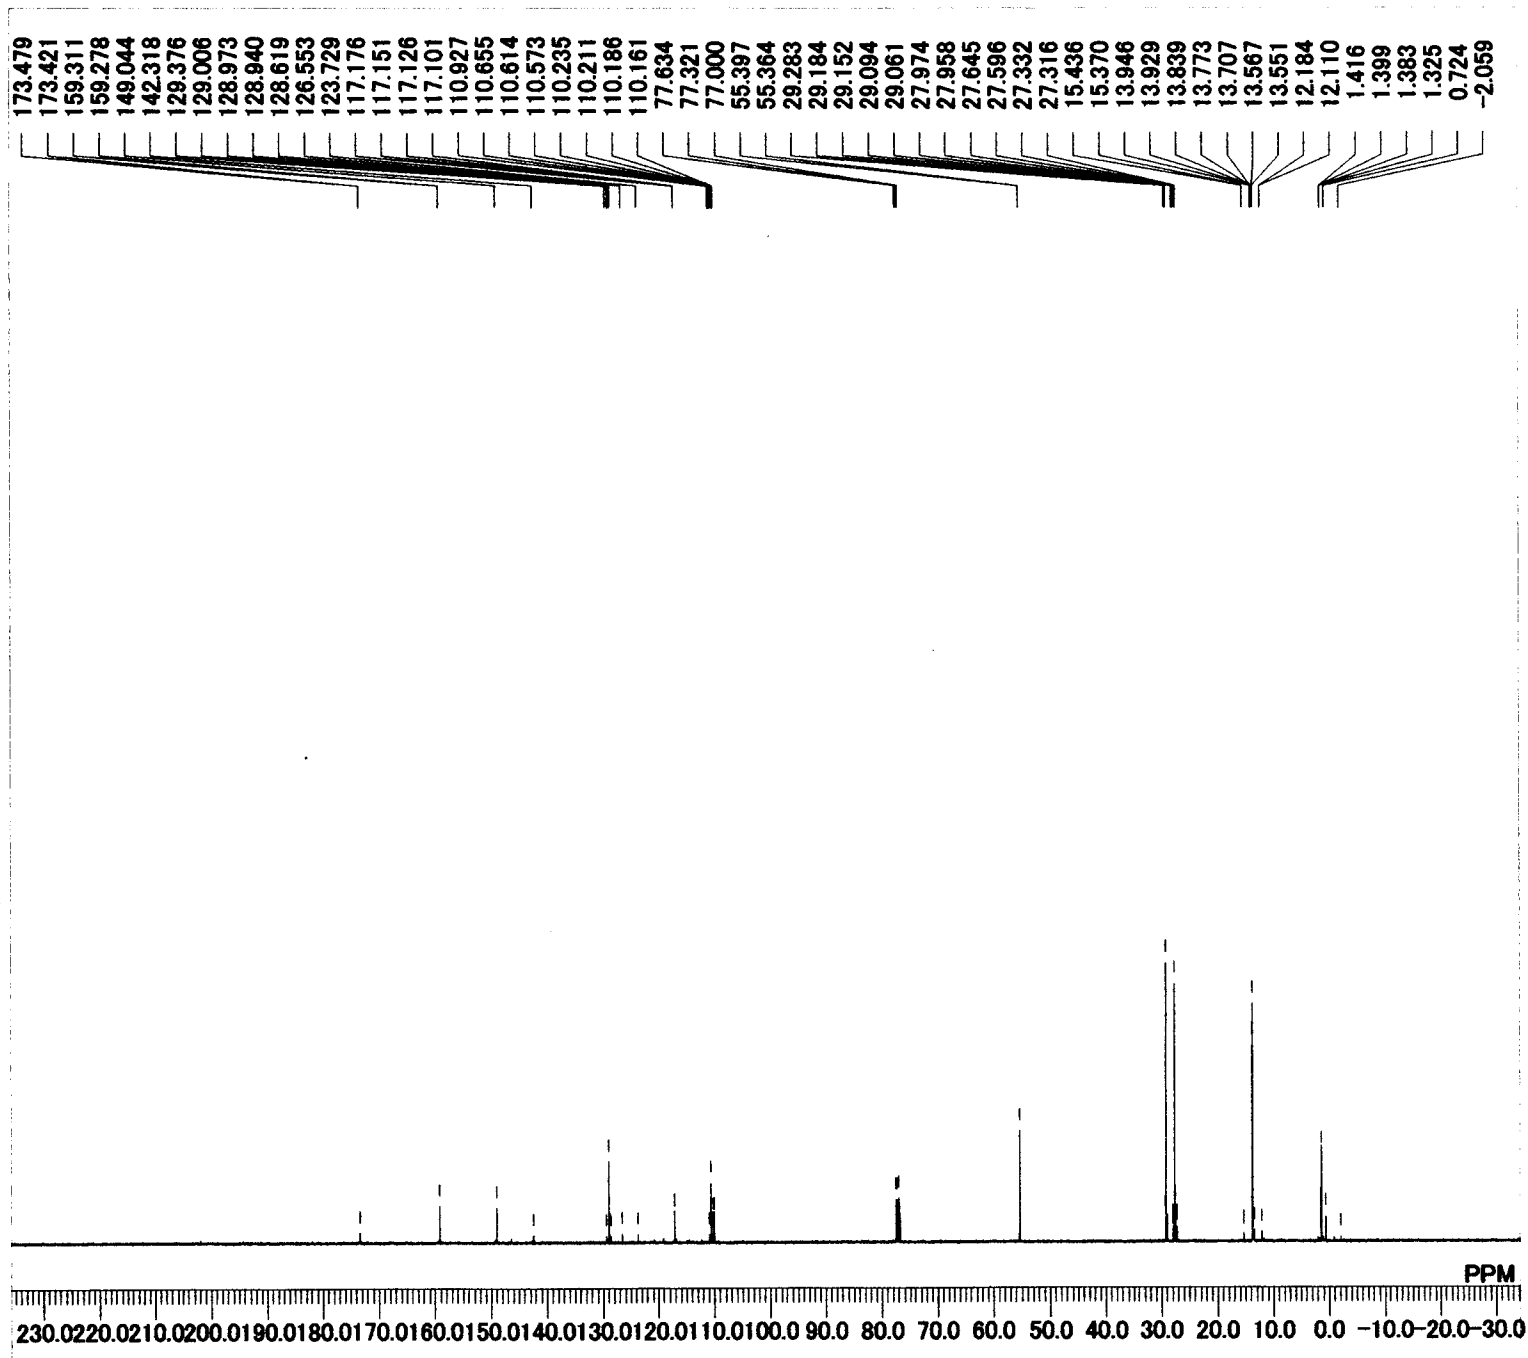

MENUF 13C  
 OBNUC 13C  
 OFR 100.40 MHz  
 OBSET 125.00 KHz  
 OBFIN 10500.00 Hz  
 PW1 6.00 usec  
 DEADT 19.10 usec  
 PREDL 0.20000 msec  
 IWT 1.0000 msec  
 POINT 32768  
 SPO 32768  
 TIMES 256  
 DUMMY 1  
 FREQU 27118.64 Hz  
 FLT 13550 Hz  
 DELAY 14.80 usec  
 ACQTM 1.2083 sec  
 PD 1.7920 sec  
 ADBIT 16  
 RGAIN 24  
 BF 0.10 Hz  
 T1 0.00  
 T2 0.00  
 T3 90.00  
 T4 100.00  
 EXMOD BCM  
 EXPCM Bilevel.complete.decoupling.Set\_IRRF  
 IRNUC 1H  
 IFR 399.65 MHz  
 IRSET 124.00 KHz  
 IRFIN 10500.00 Hz  
 IRRPW 45 usec  
 IRATN 511  
 DFILE CF3-ph-m-OMe-Sn-Si (13C) Pd(PF  
 SF TH5ATFG20  
 LKSET 61.60 KHz  
 LKFIN 79.0 Hz  
 LKLEV 180  
 LGAIN 23  
 LKPHS 231  
 LKSIG 763  
 CSPED 15 Hz  
 FILDC  
 FILDF

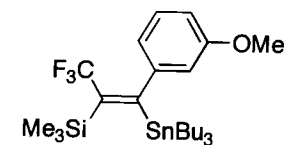

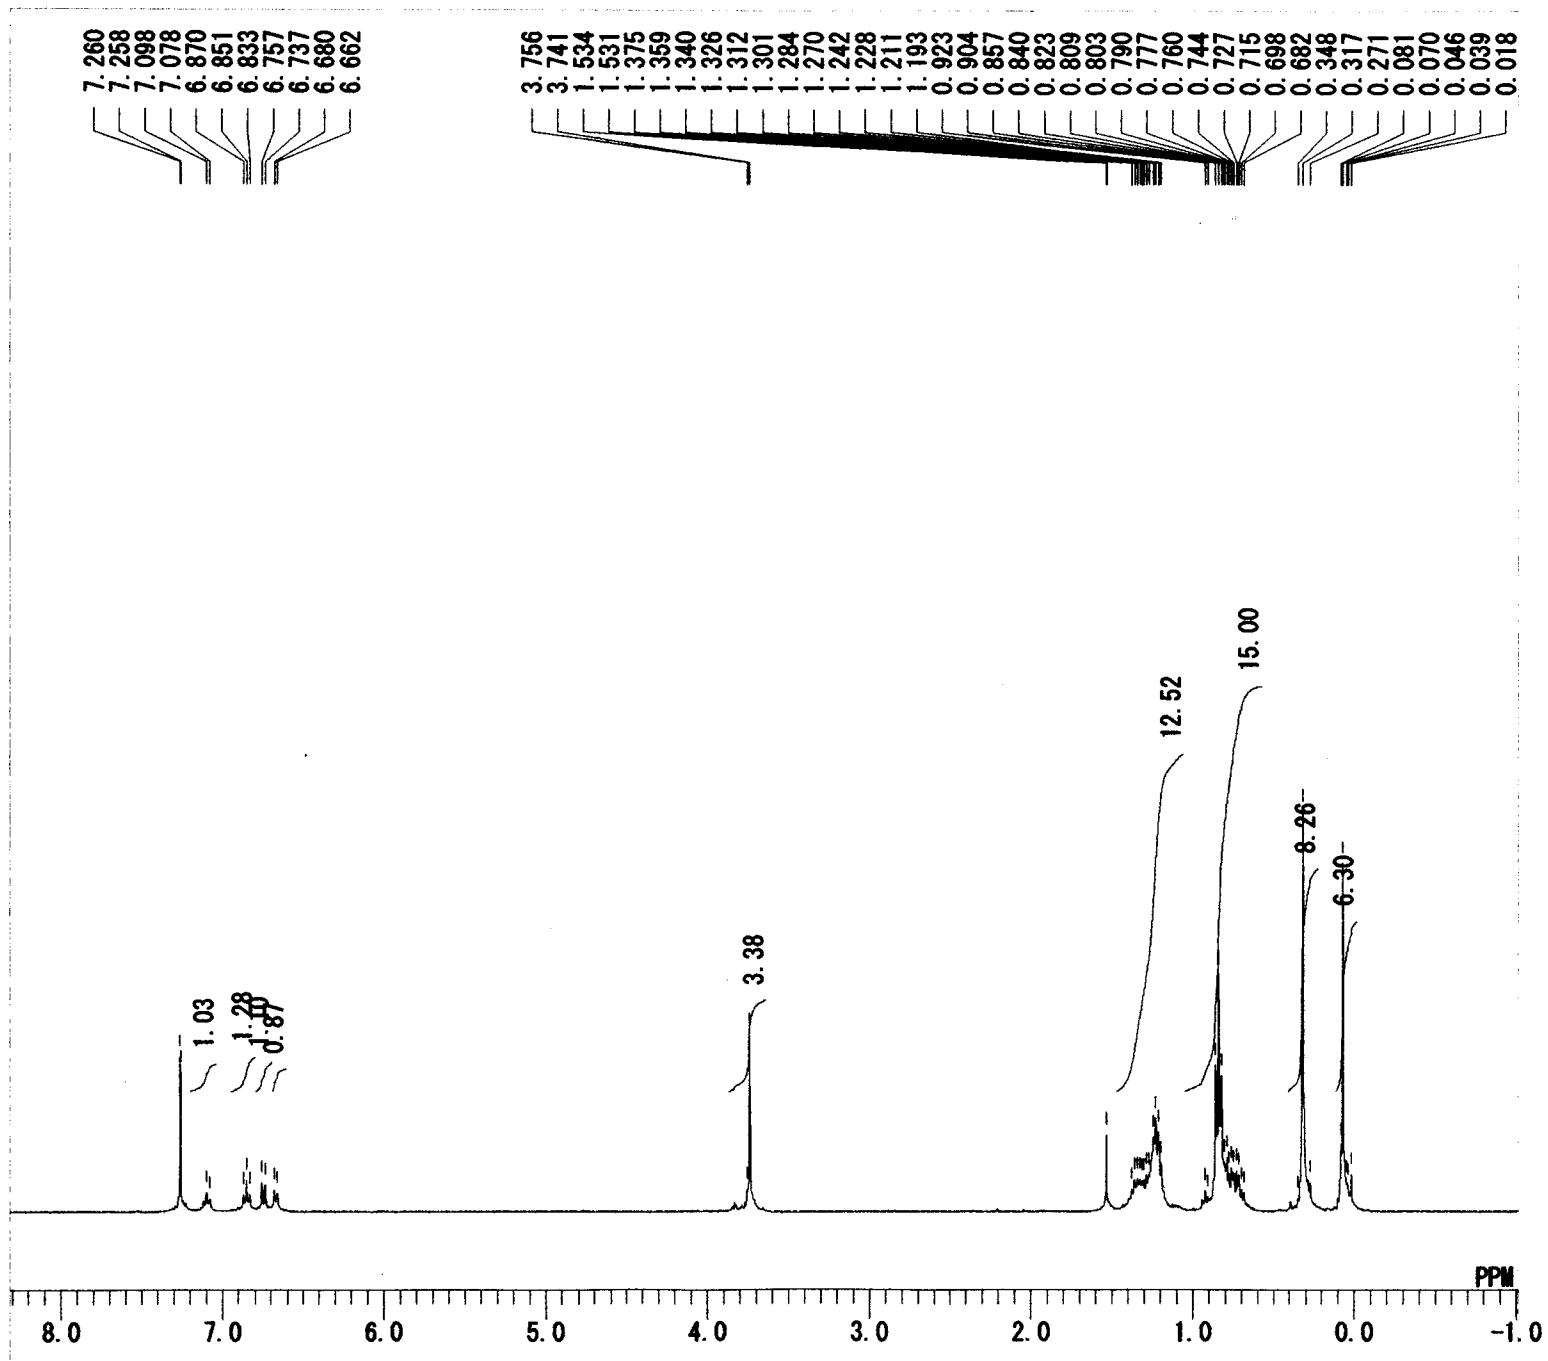

MENUF 1H  
 OBNUC 1H  
 OFR 399.65 MHz  
 OBSET 135.40 KHz  
 OBFIN 24.90 Hz  
 PW1 5.80 usec  
 DEADT 72.10 usec  
 PREDL 0.20000 msec  
 IWT 1.0000 msec  
 POINT 16384  
 SPO 16384  
 TIMES 8  
 DUMMY 1  
 FREQU 7992.01 Hz  
 FLT 4000 Hz  
 DELAY 50.00 usec  
 ACQTM 2.0501 sec  
 PD 4.9500 sec  
 ADBIT 16  
 RGAIN 18  
 BF 0.10 Hz  
 T1 0.00  
 T2 0.00  
 T3 90.00  
 T4 100.00  
 EXMOD NON  
 EXPCM NON:Single.coupled:PW1\_ACQTM  
 IRNUC 1H  
 IFR 399.65 MHz  
 IRSET 136.90 KHz  
 IRFIN 97.50 Hz  
 IRRPW 45 usec  
 IRATN 511  
 DFILE Rxn.362 H.als  
 SF TH5ATFG2  
 LKSET 61.60 KHz  
 LKFIN 79.0 Hz  
 LKLEV 180  
 LGAIN 24  
 LKPHS 238  
 LKSIG 798  
 CSPED 12 Hz  
 FILDC  
 FILDF

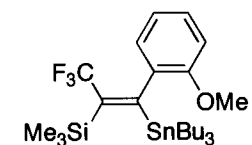

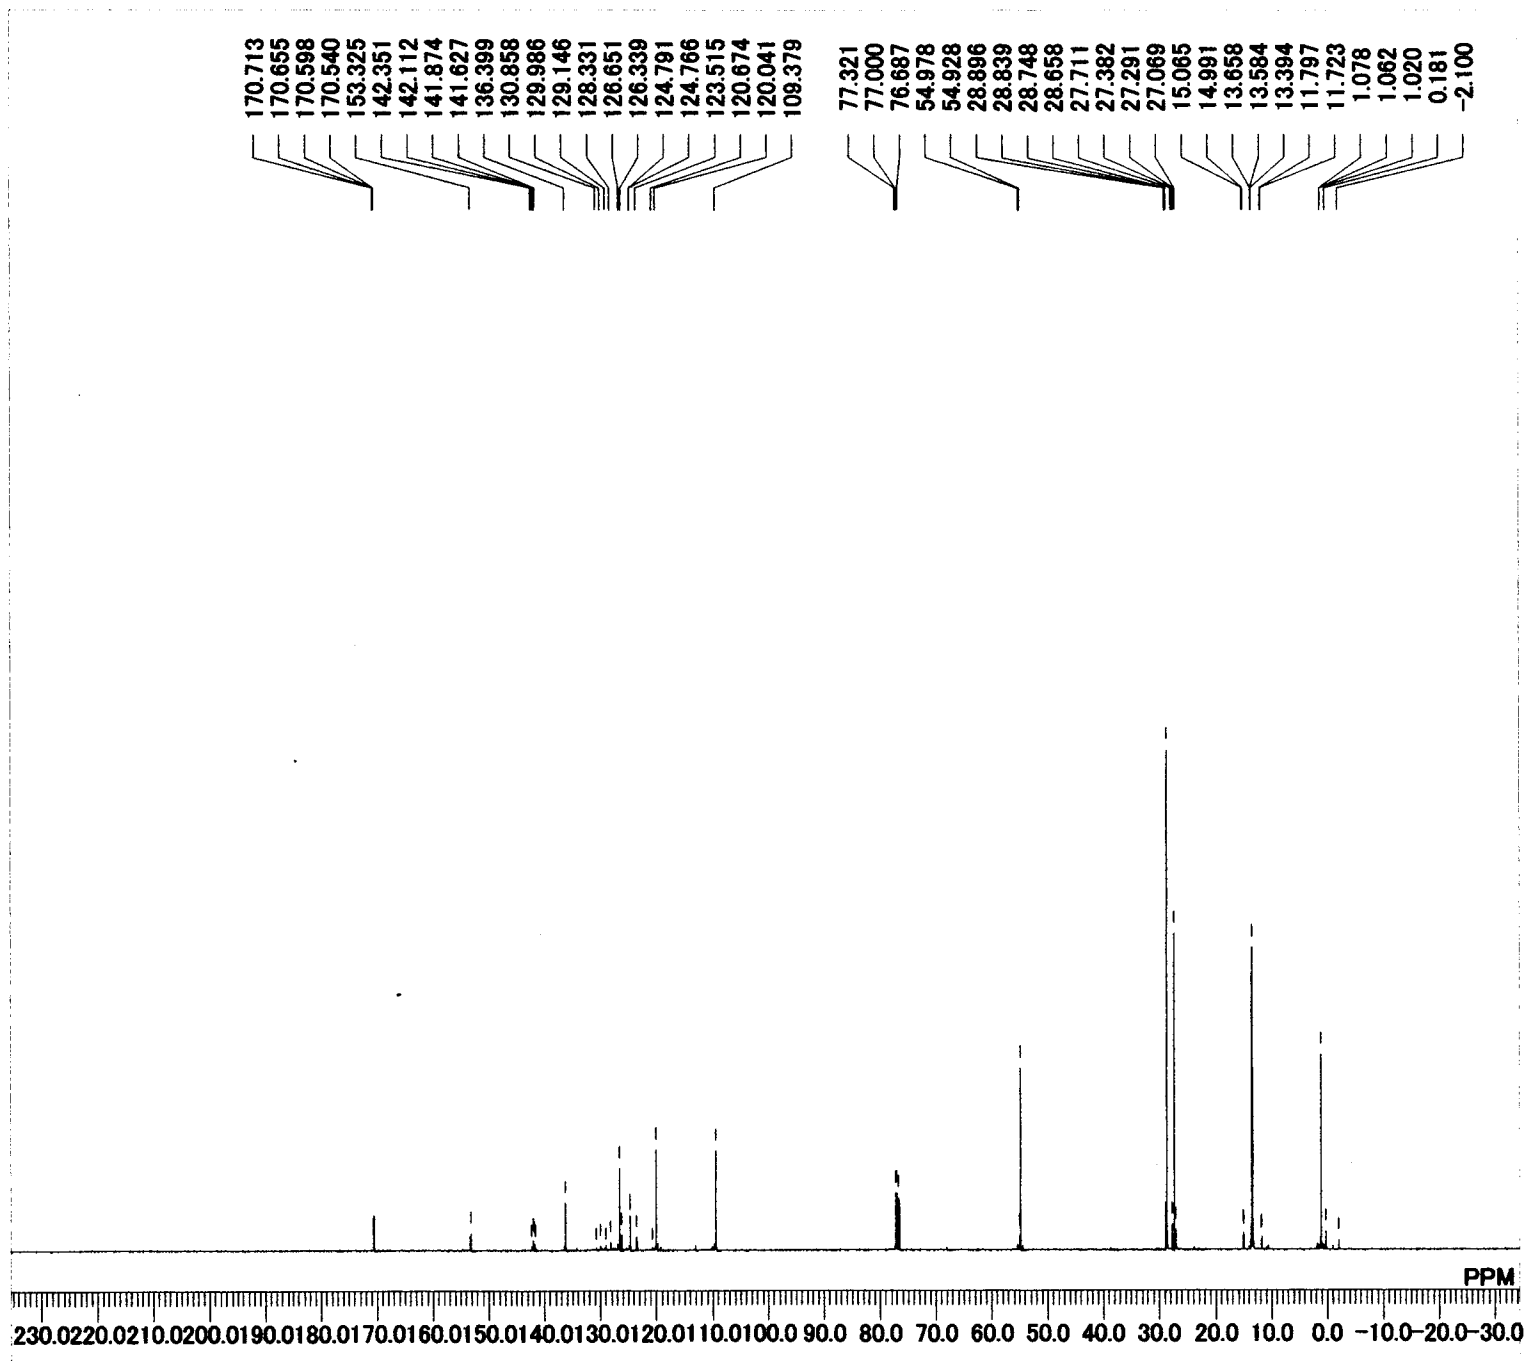

MENUF 13C  
OBNUC 13C  
OFR 100.40 MHz  
OBSET 125.00 KHz  
OBFIN 10500.00 Hz  
PW1 6.00 usec  
DEADT 19.10 usec  
PREDL 0.20000 msec  
IWT 1.0000 msec  
POINT 32768  
SPO 32768  
TIMES 20000  
DUMMY 1  
FREQU 27118.64 Hz  
FLT 13550 Hz  
DELAY 14.80 usec  
ACQTM 1.2083 sec  
PD 1.7920 sec  
ADBIT 16  
RGAIN 24  
BF 0.10 Hz  
T1 0.00  
T2 0.00  
T3 100.00  
T4 100.00  
EXMOD BCM  
EXPCM Bilevel.complete.decoupling:Set\_IRRF  
IRNUC 1H  
IFR 399.65 MHz  
IRSET 124.00 KHz  
IRFIN 10500.00 Hz  
IRRPW 45 usec  
IRATN 511  
DFILE CF3-ph-o-OMe-Sn-Si (13C)新 Pd(I)  
SF TH5ATFG2  
LKSET 61.60 KHz  
LKFIN 79.0 Hz  
LKLEV 180  
LGAIN 23  
LKPHS 229  
LKSIG 721  
CSPED 14 Hz  
FILDC  
FILDF

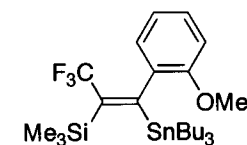

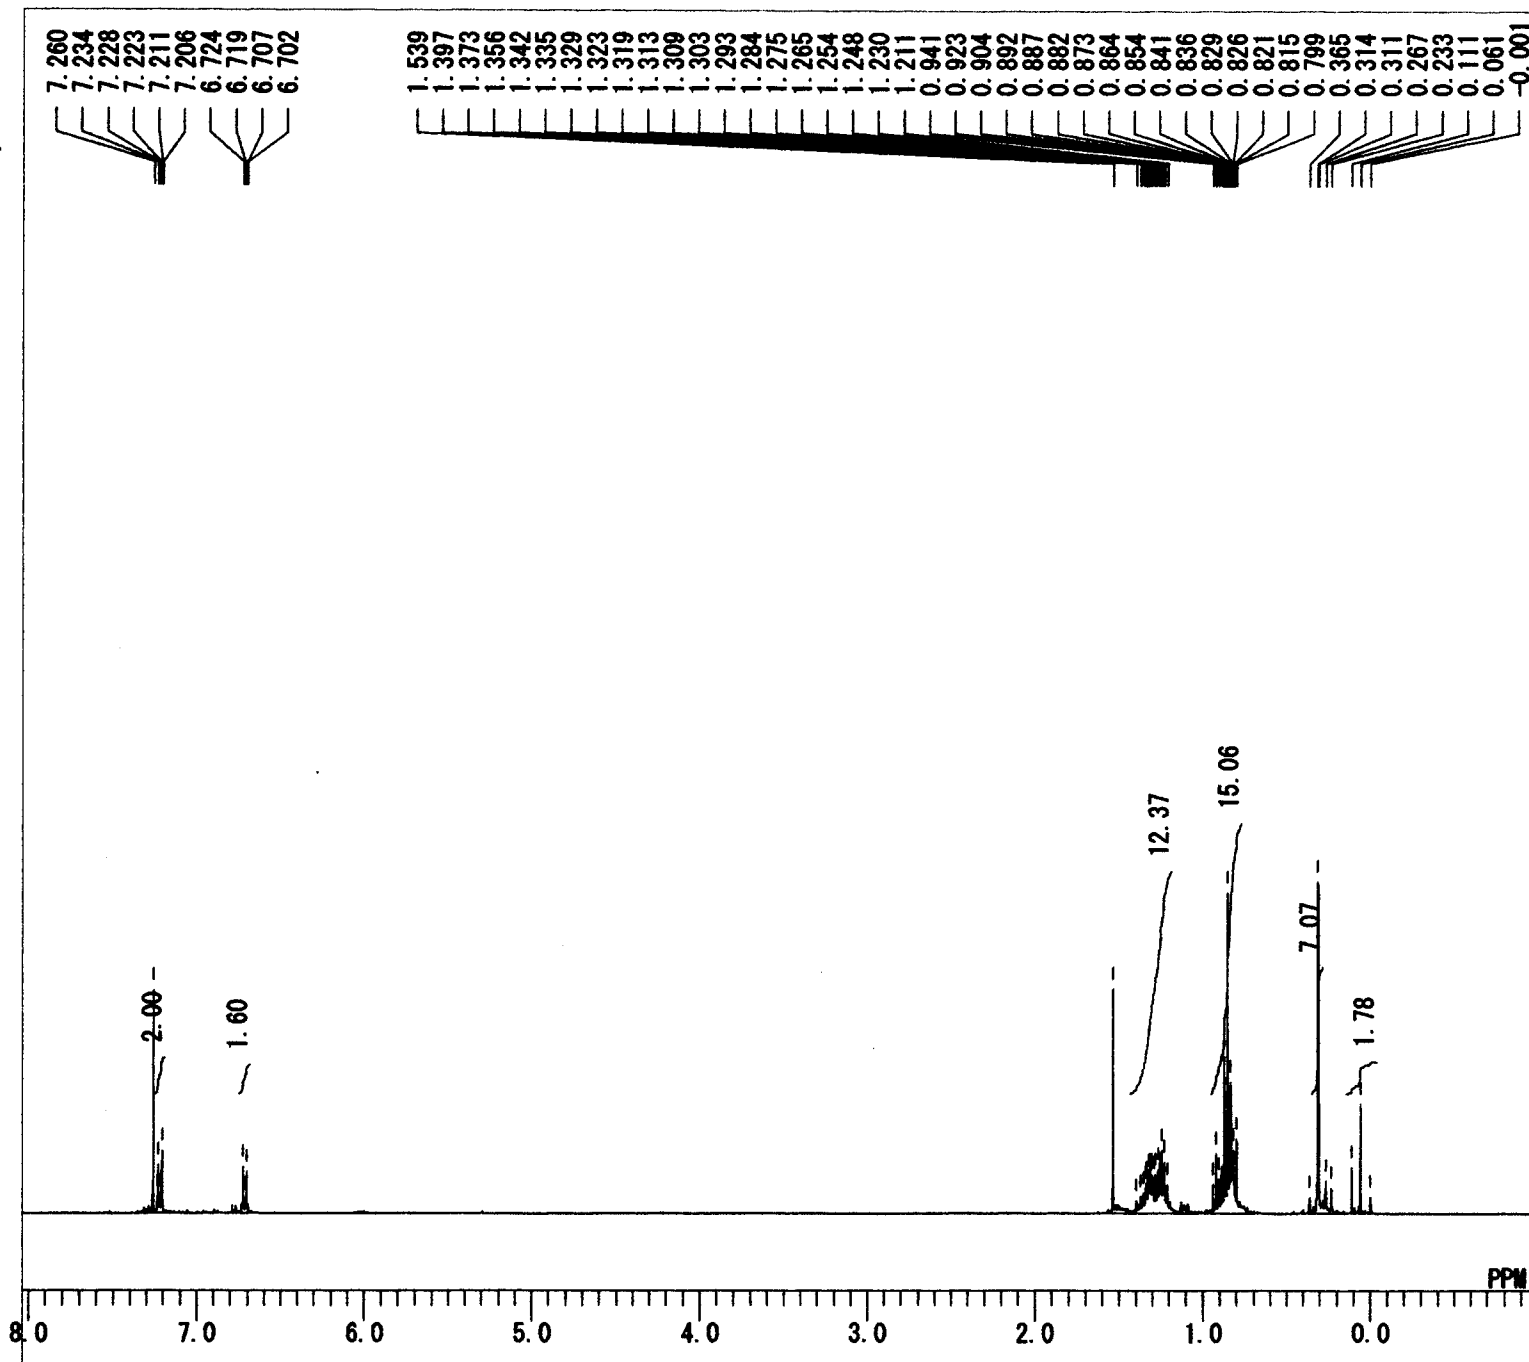

MENUF 1H  
 OBNUC 1H  
 OFR 399.65 MHz  
 OBSSET 135.40 KHz  
 OBFIN 24.90 Hz  
 PW1 5.80 usec  
 DEADT 72.10 usec  
 PREDL 0.20000 msec  
 IWT 1.0000 msec  
 POINT 16384  
 SPO 16384  
 TIMES 8  
 DUMMY 1  
 FREQU 7992.01 Hz  
 FLT 4000 Hz  
 DELAY 50.00 usec  
 ACQTM 2.0501 sec  
 PD 4.9500 sec  
 ADBIT 16  
 RGAIN 17  
 BF 0.00 Hz  
 T1 0.00  
 T2 0.00  
 T3 90.00  
 T4 100.00  
 EXMOD NON  
 EXPCM NON: Single. coupled: PW1\_ACQTM  
 IRNUC 1H  
 IFR 399.65 MHz  
 IRSET 136.90 KHz  
 IRFIN 97.50 Hz  
 IRRPW 45 usec  
 IRATN 511  
 DFILE Rxn. 334 H. als  
 SF TH5ATFG2  
 LKSET 61.60 KHz  
 LKFIN 79.0 Hz  
 LKLEV 180  
 LGAIN 22  
 LKPHS 250  
 LKSIG 831  
 CSPED 12 Hz  
 FILDC  
 FILDF

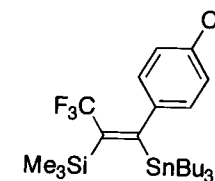

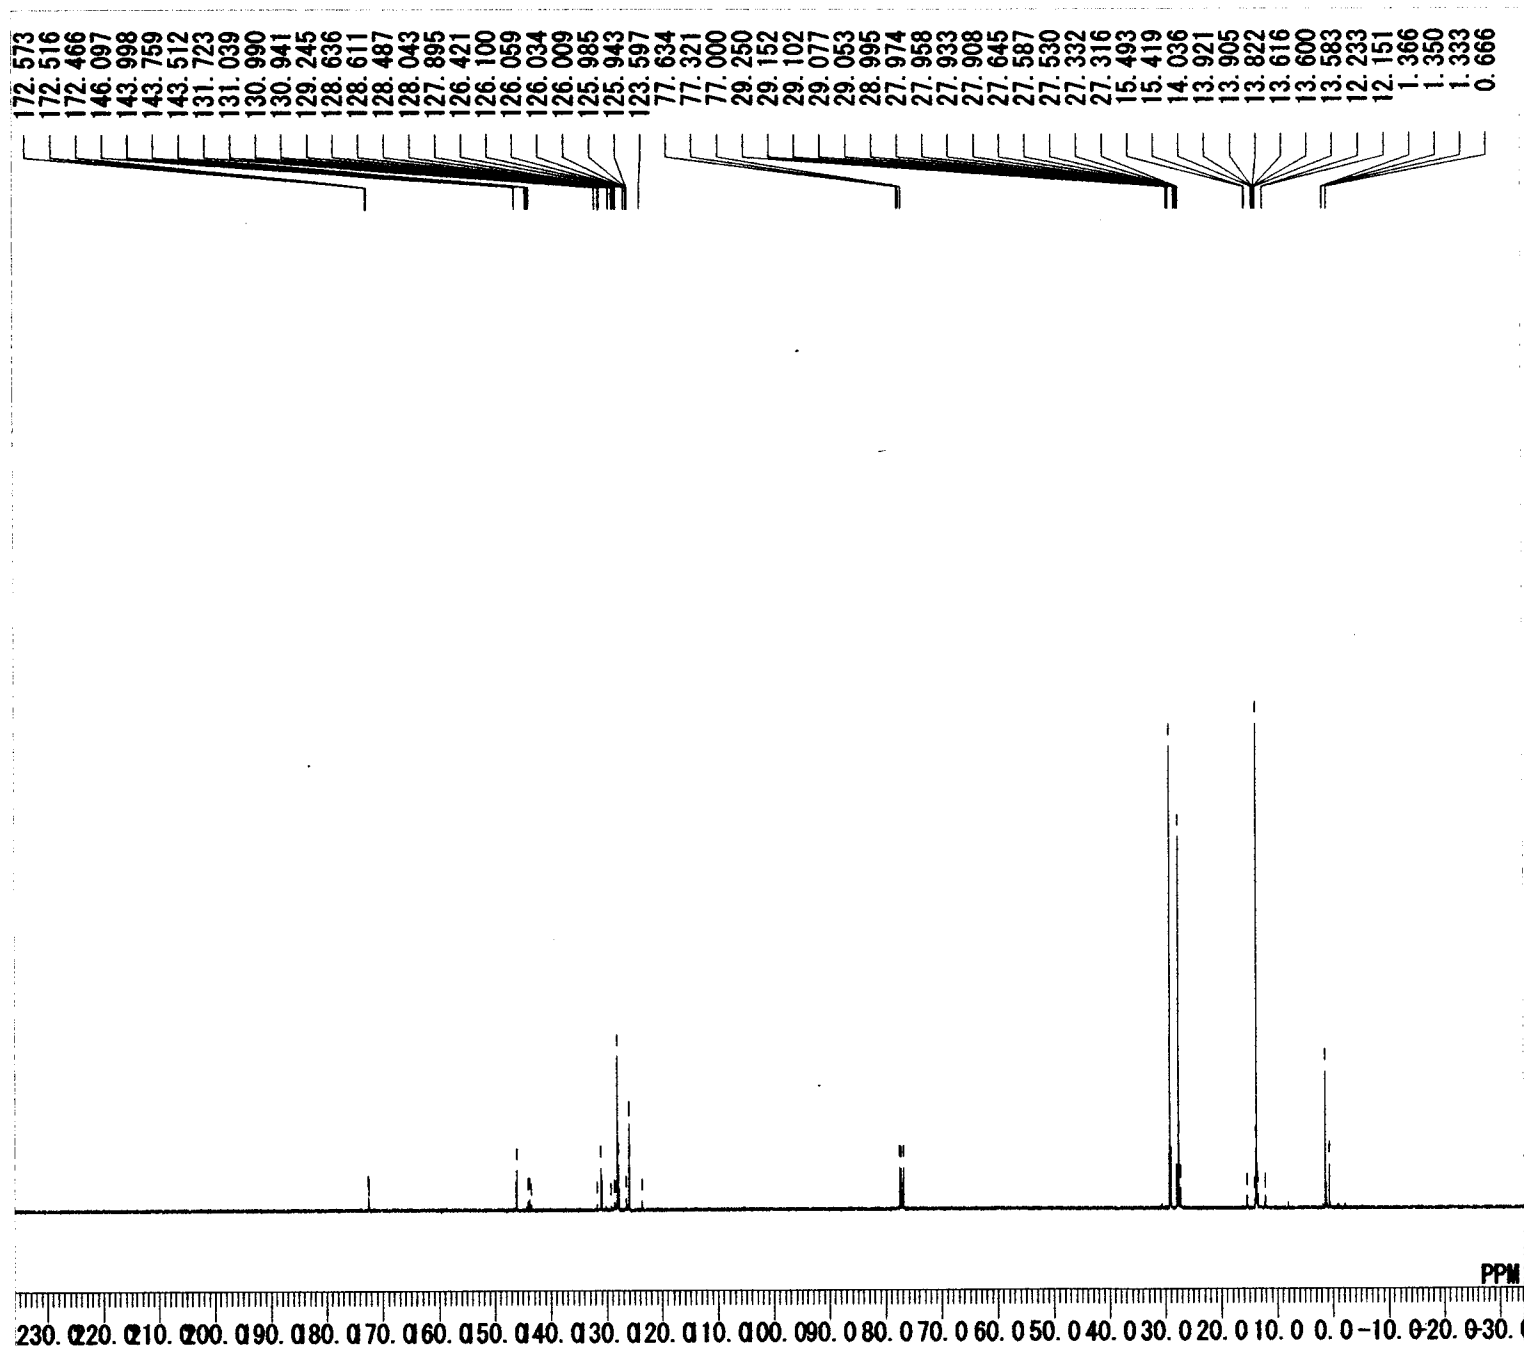

MENUF 13C  
 OBNUC 13C  
 OFR 100.40 MHz  
 OBSET 125.00 KHz  
 OBFIN 10500.00 Hz  
 PW1 6.00 usec  
 DEADT 19.10 usec  
 PREDL 0.20000 msec  
 IWT 1.0000 msec  
 POINT 32768  
 SPO 32768  
 TIMES 512  
 DUMMY 1  
 FREQU 27118.64 Hz  
 FLT 13550 Hz  
 DELAY 14.80 usec  
 ACQTM 1.2083 sec  
 PD 1.7920 sec  
 ADBIT 16  
 RGAIN 24  
 BF 0.10 Hz  
 T1 0.00  
 T2 0.00  
 T3 90.00  
 T4 100.00  
 EXMOD BCM  
 EXPCM Bilevel. complete. decoupling:1  
 IRNUC 1H  
 IFR 399.65 MHz  
 IRSET 124.00 KHz  
 IRFIN 10500.00 Hz  
 IRRPW 45 usec  
 IRATN 511  
 DFILE CF3-ph-pCl-Sn-Si (13C) Pd(PPh)  
 SF TH5ATFG2  
 LKSET 61.60 KHz  
 LKFIN 79.0 Hz  
 LKLEV 180  
 LGAIN 25  
 LKPHS 238  
 LKSIG 743  
 CSPED 10 Hz  
 FILDC  
 FILDF

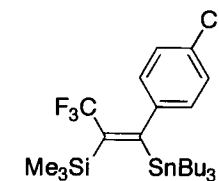

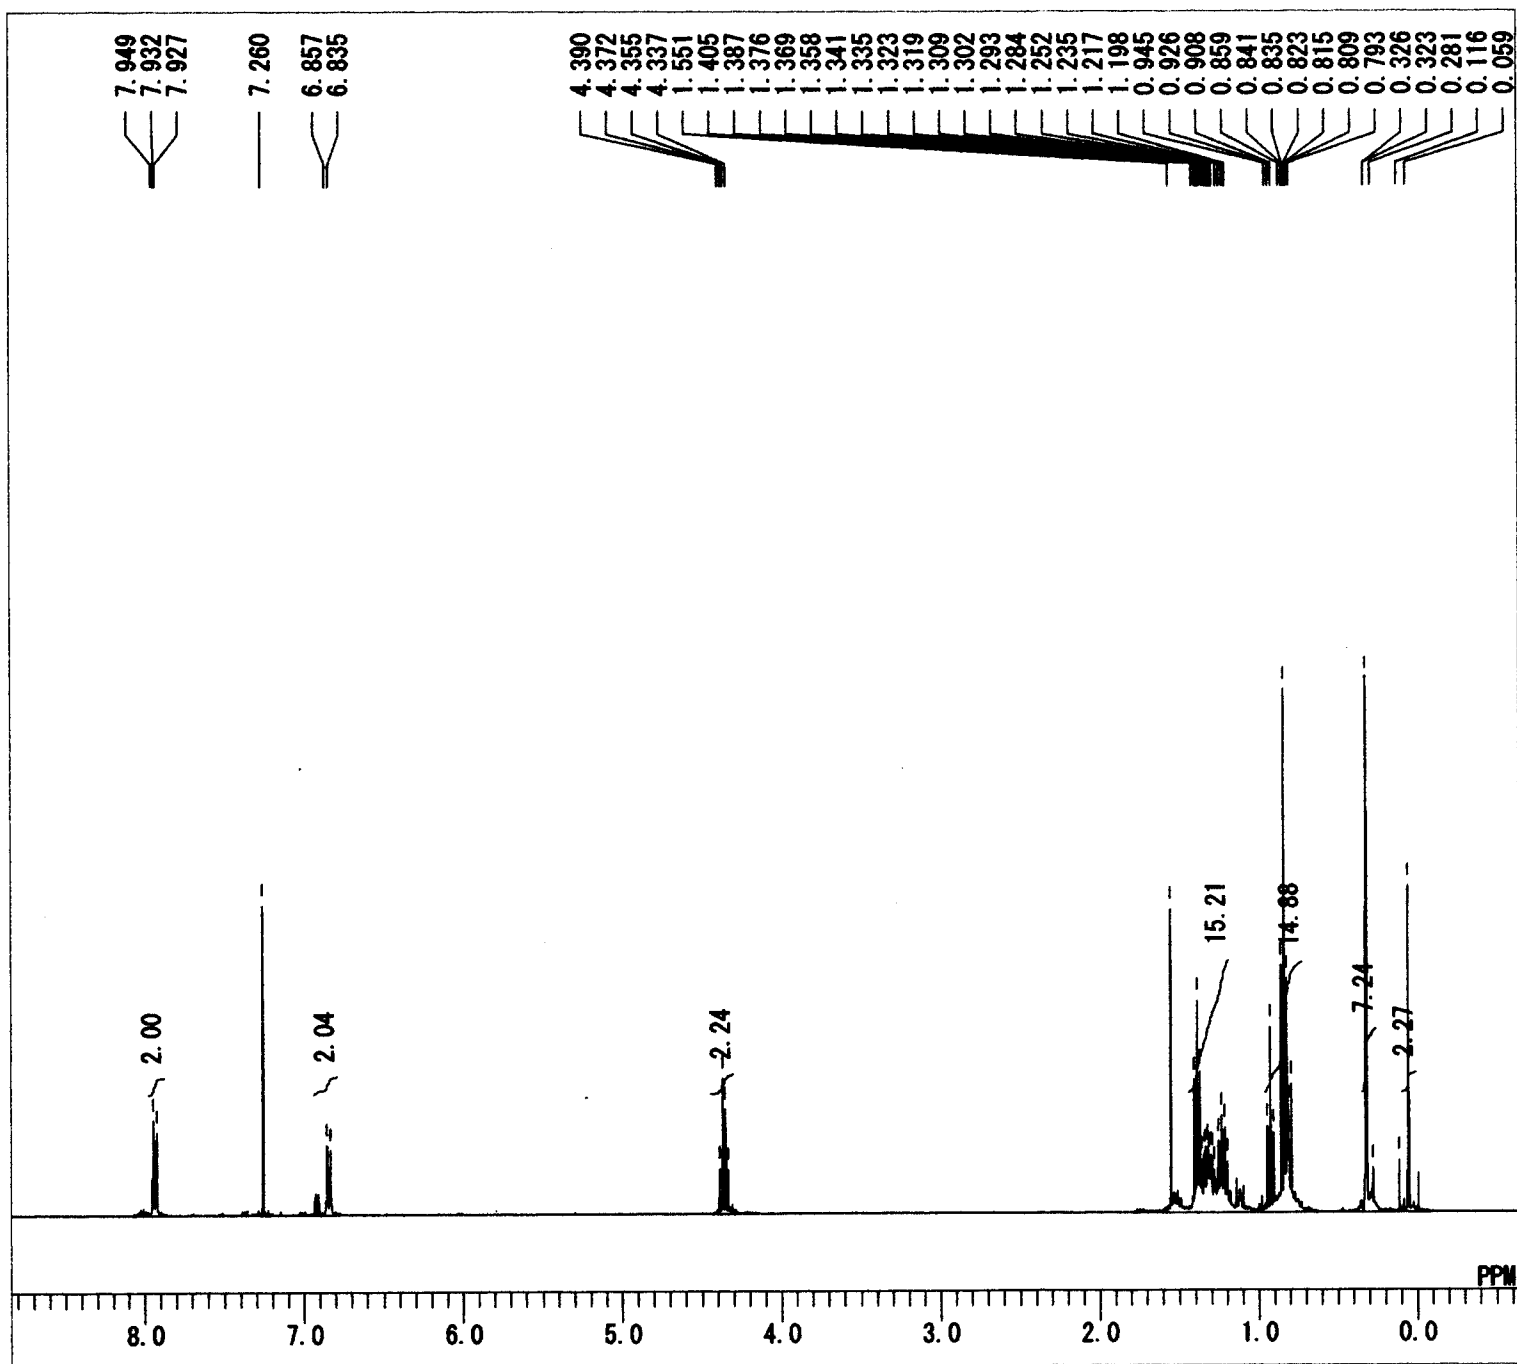

```

MENUF 1H
OBNUC 1H
OFR 399.65 MHz
OBSET 135.40 KHz
OBFIN 24.90 Hz
PW1 5.80 usec
DEADT 72.10 usec
PREDL 0.20000 msec
IWT 1.0000 msec
POINT 16384
SPO 16384
TIMES 8
DUMMY 1
FREQU 7992.01 Hz
FLT 4000 Hz
DELAY 50.00 usec
ACQTM 2.0501 sec
PD 4.9500 sec
ADBIT 16
RGAIN 17
BF 0.00 Hz
T1 0.00
T2 0.00
T3 90.00
T4 100.00
EXMOD NON
EXPCM NON:Single.coupled:PW1_ACQTM
IRNUC 1H
IFR 399.65 MHz
IRSET 136.90 KHz
IRFIN 97.50 Hz
IRRPW 45 usec
IRATN 511
DFILE _DEFAULT.ALS
SF TH5ATFG2
LKSET 61.60 KHz
LKFIN 79.0 Hz
LKLEV 180
LGAIN 23
LKPHS 250
LKSIG 1172
CSPED 12 Hz
FILDC
FILDF
    
```

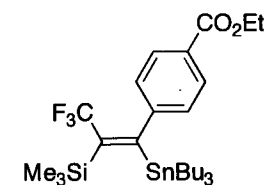

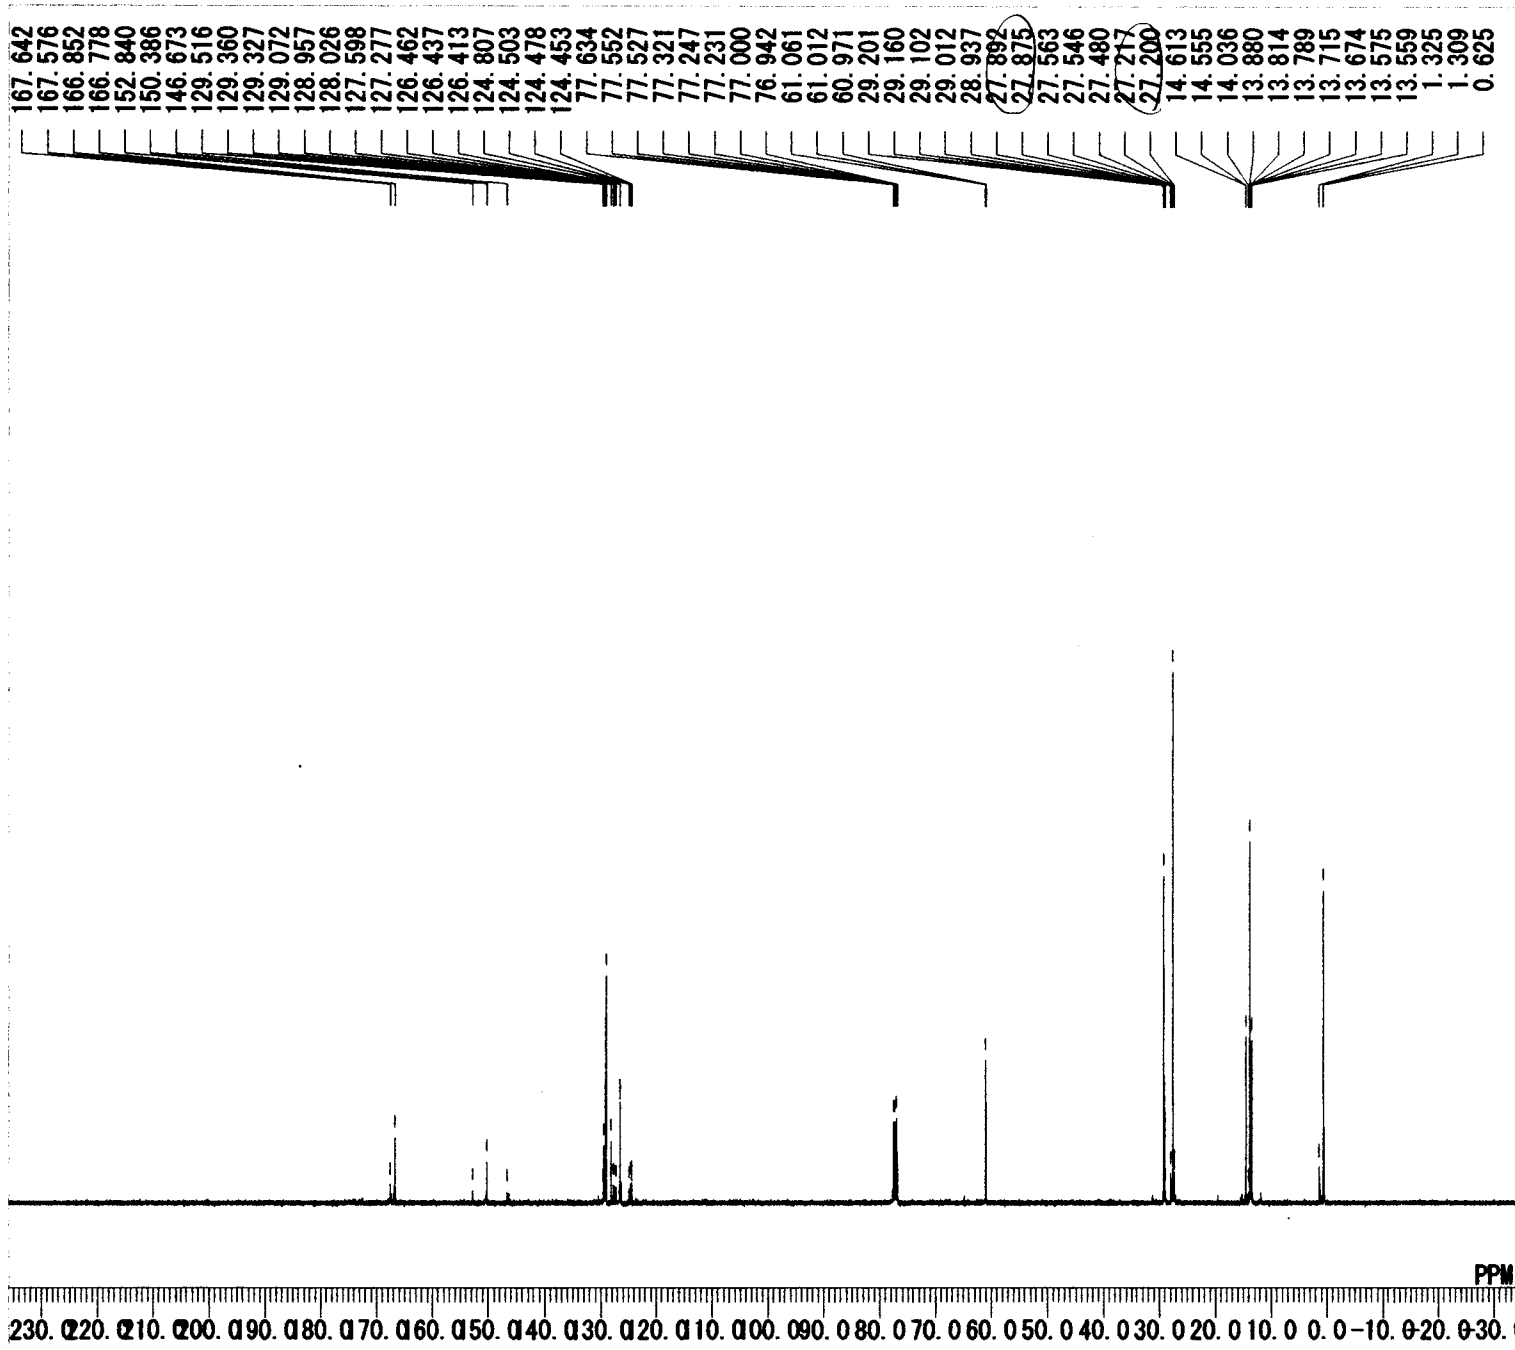

```

MENUF 13C
OBNUC 13C
OFR 100.40 MHz
OBSET 125.00 KHz
OBFIN 10500.00 Hz
PW1 6.00 usec
DEADT 19.10 usec
PREDL 0.20000 msec
IWT 1.0000 msec
POINT 32768
SPO 32768
TIMES 512
DUMMY 1
FREQU 27118.64 Hz
FLT 13550 Hz
DELAY 14.80 usec
ACQTM 1.2083 sec
PD 1.7920 sec
ADBIT 16
RGAIN 25
BF 0.10 Hz
T1 0.00
T2 0.00
T3 90.00
T4 100.00
EXMOD BCM
EXPCM Bilevel. complete. decoupling:
IRNUC 1H
IFR 399.65 MHz
IRSET 124.00 KHz
IRFIN 10500.00 Hz
IRRPW 45 usec
IRATN 511
DFILE DEFAULT.ALS
SF TH5ATFG2
LKSET 61.60 KHz
LKFIN 79.0 Hz
LKLEV 180
LGAIN 26
LKPHS 238
LKSIG 1053
CSPED 11 Hz
FILDC
FILDF
    
```

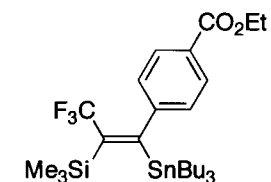



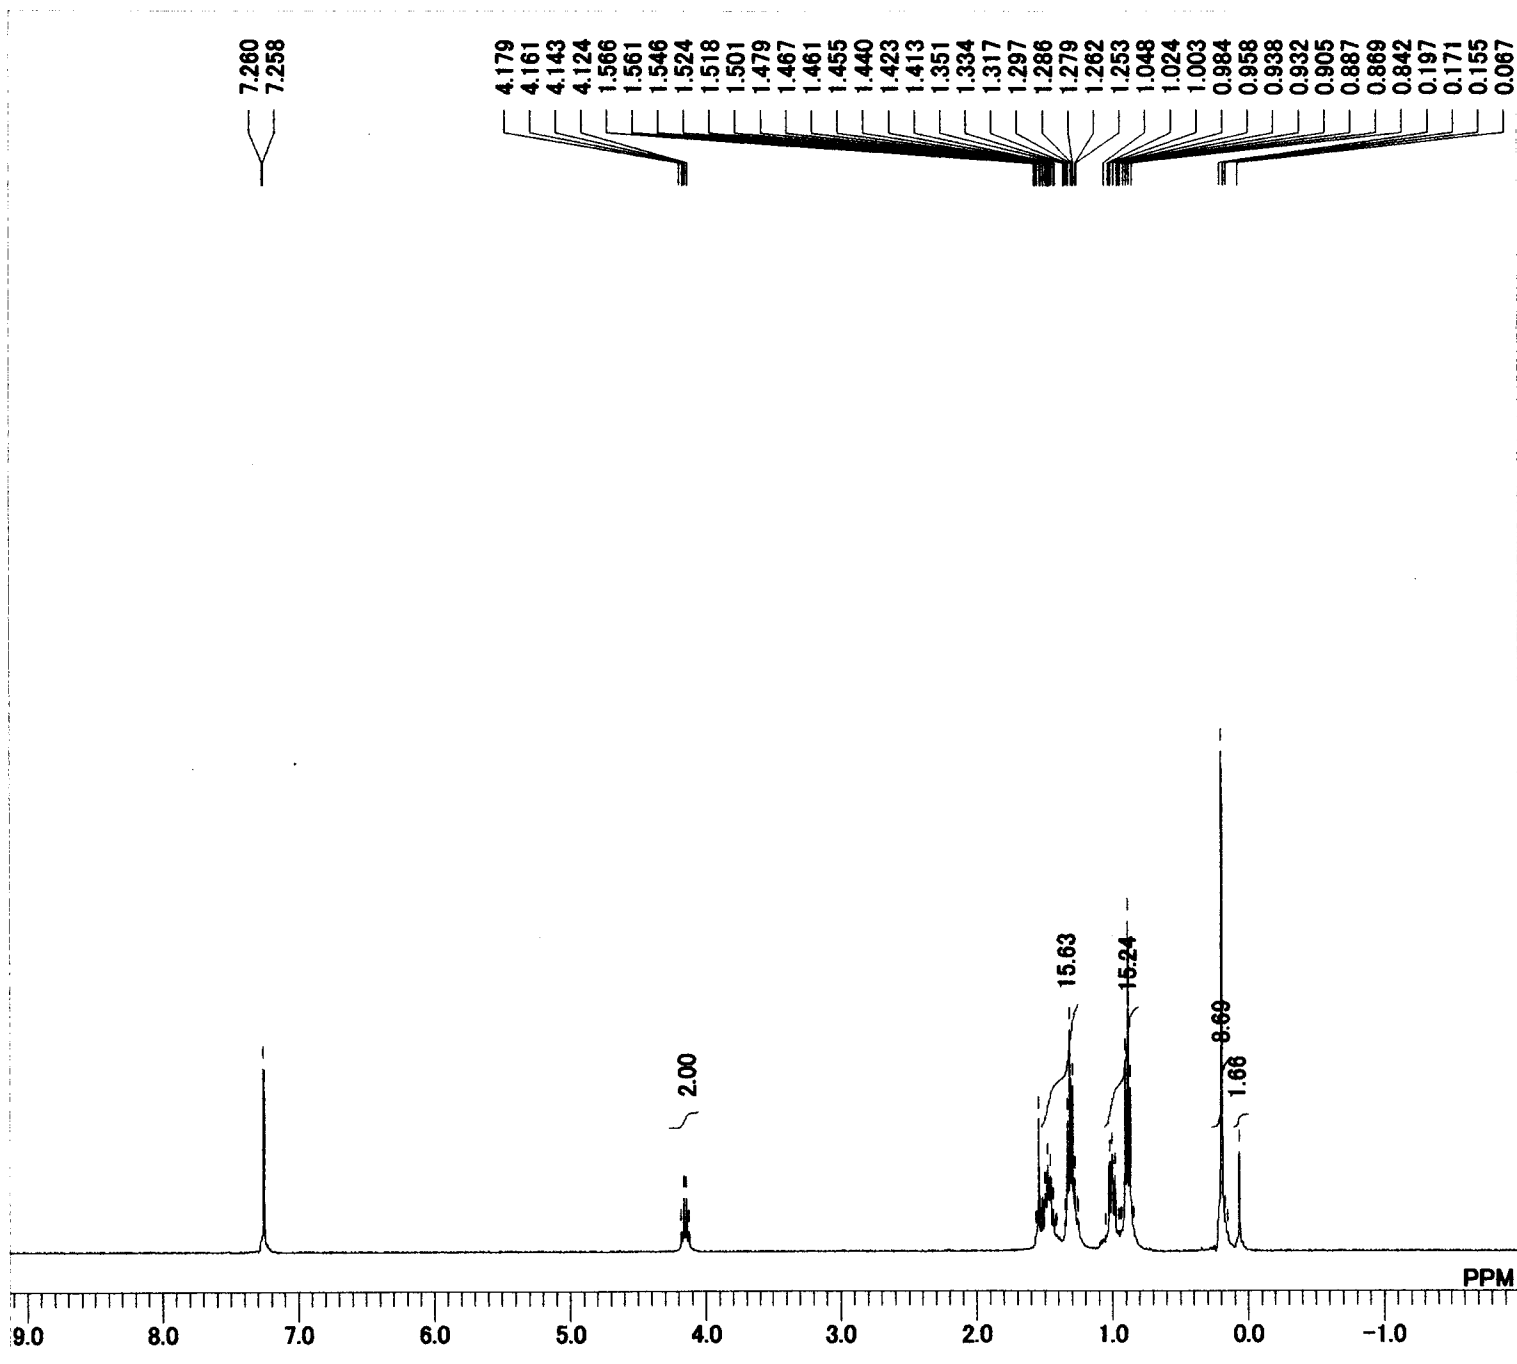

|       |                                 |
|-------|---------------------------------|
| MENUF | 1H                              |
| OBNUC | 1H                              |
| OFR   | 399.65 MHz                      |
| OBSET | 135.40 KHz                      |
| OBFIN | 24.90 Hz                        |
| PW1   | 5.80 usec                       |
| DEADT | 72.10 usec                      |
| PREDL | 0.20000 msec                    |
| IWT   | 1.0000 msec                     |
| POINT | 16384                           |
| SPO   | 16384                           |
| TIMES | 8                               |
| DUMMY | 1                               |
| FREQU | 7992.01 Hz                      |
| FLT   | 4000 Hz                         |
| DELAY | 50.00 usec                      |
| ACQTM | 2.0501 sec                      |
| PD    | 4.9500 sec                      |
| ADBIT | 16                              |
| RGAIN | 18                              |
| BF    | 0.10 Hz                         |
| T1    | 0.00                            |
| T2    | 0.00                            |
| T3    | 90.00                           |
| T4    | 100.00                          |
| EXMOD | NON                             |
| EXPCM | NON:Single.coupled:PW1_ACQTM_PI |
| IRNUC | 1H                              |
| IFR   | 399.65 MHz                      |
| IRSET | 136.90 KHz                      |
| IRFIN | 97.50 Hz                        |
| IRRPW | 45 usec                         |
| IRATN | 511                             |
| DFILE | 5.27 ue H.als                   |
| SF    | TH5ATFG2                        |
| LKSET | 61.60 KHz                       |
| LKFIN | 79.0 Hz                         |
| LKLEV | 180                             |
| LGAIN | 22                              |
| LKPHS | 238                             |
| LKSIG | 460                             |
| CSPED | 11 Hz                           |
| FILDC |                                 |
| FILDF |                                 |

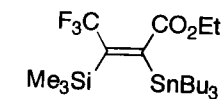

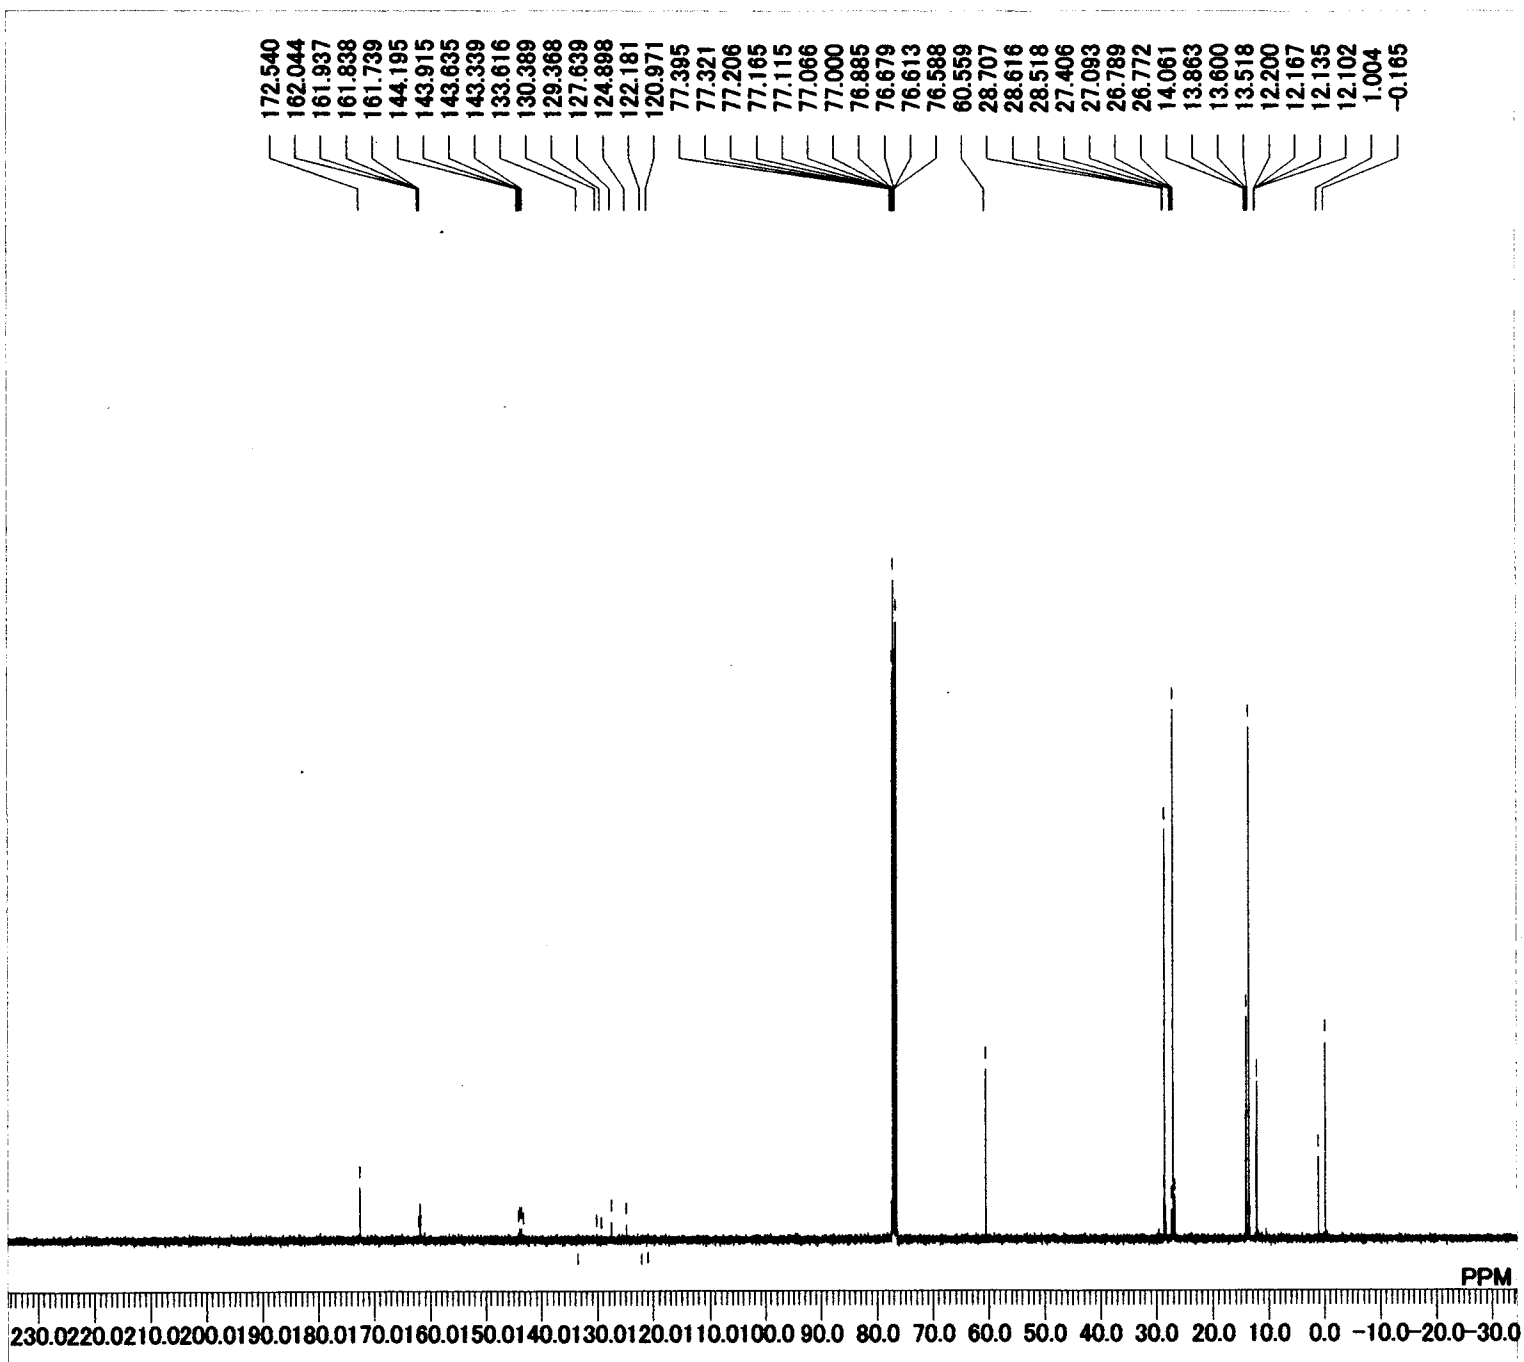

MENUF 13C  
 OBNUC 13C  
 OFR 100.40 MHz  
 OBSET 125.00 KHz  
 OBFIN 10500.00 Hz  
 PW1 6.00 usec  
 DEADT 19.10 usec  
 PREDL 0.20000 msec  
 IWT 1.0000 msec  
 POINT 32768  
 SPO 32768  
 TIMES 3000  
 DUMMY 1  
 FREQU 27118.64 Hz  
 FLT 13550 Hz  
 DELAY 14.80 usec  
 ACQTM 1.2083 sec  
 PD 1.7920 sec  
 ADBIT 16  
 RGAIN 24  
 BF 0.10 Hz  
 T1 0.00  
 T2 0.00  
 T3 90.00  
 T4 100.00  
 EXMOD BCM  
 EXPCM Bilevel.complete.decoupling.Set\_IRRF  
 IRNUC 1H  
 IFR 399.65 MHz  
 IRSET 124.00 KHz  
 IRFIN 10500.00 Hz  
 IRRPW 45 usec  
 IRATN 511  
 DFILE \_DEFAULT.ALS  
 SF TH5ATFG2  
 LKSET 61.60 KHz  
 LKFIN 79.0 Hz  
 LKLEV 180  
 LGAIN 24  
 LKPHS 238  
 LKSIG 709  
 CSPED 14 Hz  
 FILDC  
 FILDF

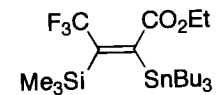

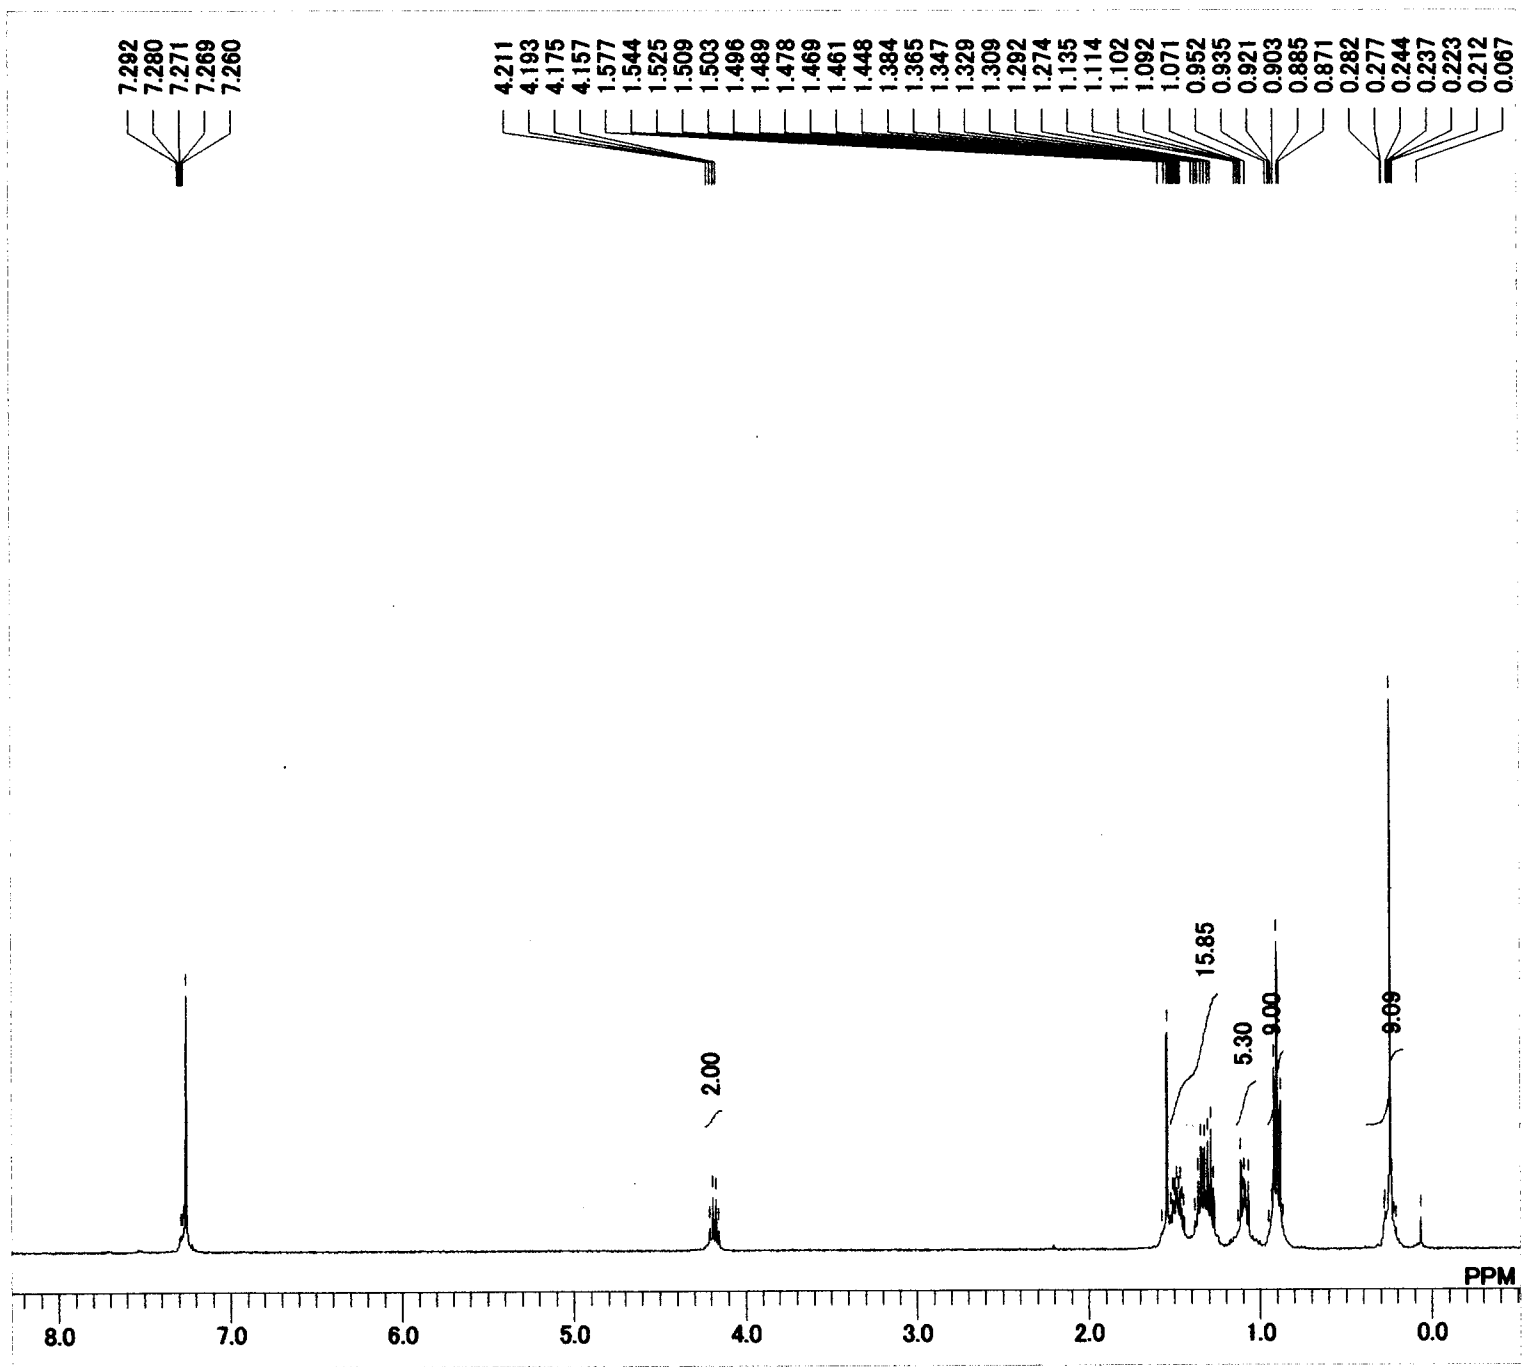

|       |                                  |
|-------|----------------------------------|
| MENUF | 1H                               |
| OBNUC | 1H                               |
| OFR   | 399.65 MHz                       |
| OBSET | 135.40 KHz                       |
| OBFIN | 24.90 Hz                         |
| PW1   | 5.80 usec                        |
| DEADT | 72.10 usec                       |
| PREDL | 0.20000 msec                     |
| IWT   | 1.0000 msec                      |
| POINT | 16384                            |
| SPO   | 16384                            |
| TIMES | 8                                |
| DUMMY | 1                                |
| FREQU | 7992.01 Hz                       |
| FLT   | 4000 Hz                          |
| DELAY | 50.00 usec                       |
| ACQTM | 2.0501 sec                       |
| PD    | 4.9500 sec                       |
| ADBIT | 16                               |
| RGAIN | 19                               |
| BF    | 0.10 Hz                          |
| T1    | 0.00                             |
| T2    | 0.00                             |
| T3    | 90.00                            |
| T4    | 100.00                           |
| EXMOD | NON                              |
| EXPCM | NON:Single.coupled:PW1_ACQTM_PI  |
| IRNUC | 1H                               |
| IFR   | 399.65 MHz                       |
| IRSET | 136.90 KHz                       |
| IRFIN | 97.50 Hz                         |
| IRRPW | 45 usec                          |
| IRATN | 511                              |
| DFILE | 5.27 shita H CF3-Sn-Si-COOEt Pd( |
| SF    | TH5ATFG2                         |
| LKSET | 61.60 KHz                        |
| LKFIN | 79.0 Hz                          |
| LKLEV | 180                              |
| LGAIN | 24                               |
| LKPHS | 238                              |
| LKSIG | 884                              |
| CSPED | 13 Hz                            |
| FILDC |                                  |
| FILDF |                                  |

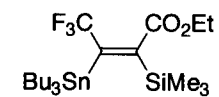

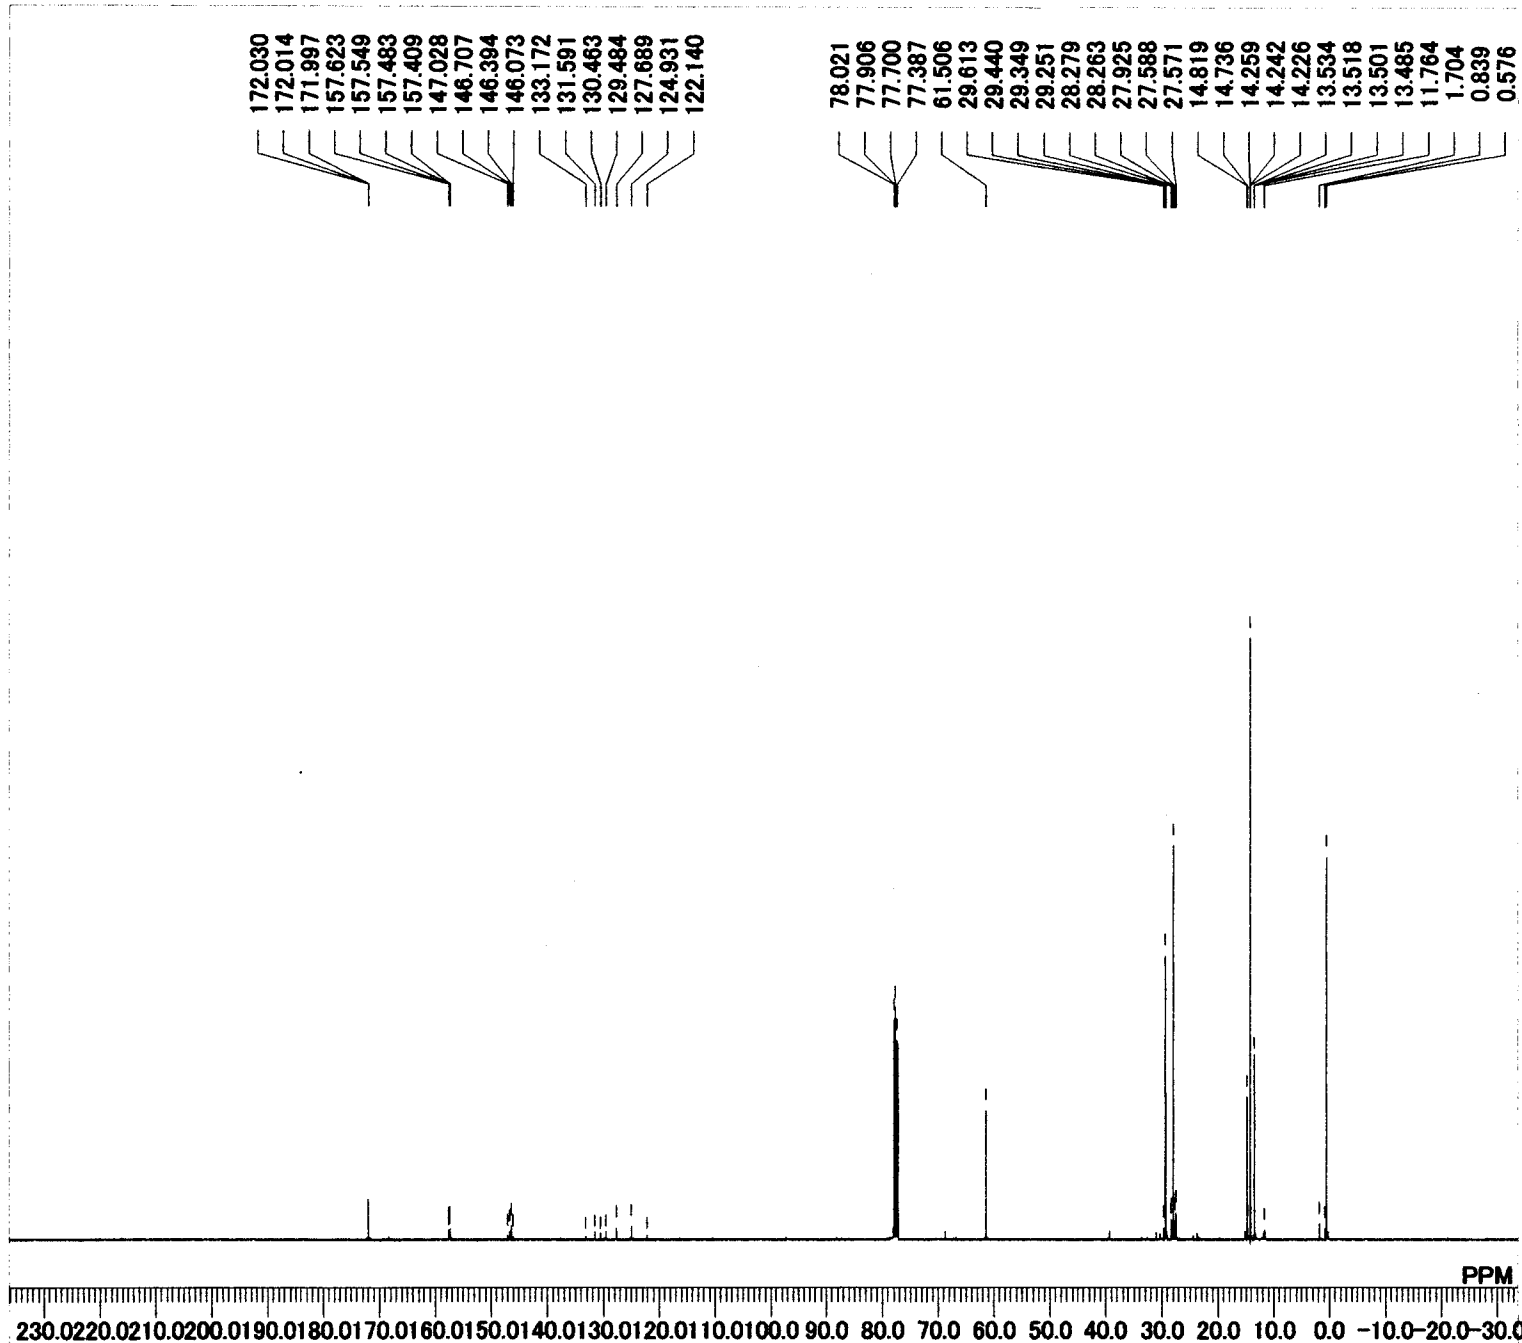

|       |                                      |
|-------|--------------------------------------|
| MENUF | 13C                                  |
| OBNUC | 13C                                  |
| OFR   | 100.40 MHz                           |
| OBSET | 125.00 KHz                           |
| OBFIN | 10500.00 Hz                          |
| PW1   | 6.00 usec                            |
| DEADT | 19.10 usec                           |
| PREDL | 0.20000 msec                         |
| IWT   | 1.0000 msec                          |
| POINT | 32768                                |
| SPO   | 32768                                |
| TIMES | 20000                                |
| DUMMY | 1                                    |
| FREQU | 27118.64 Hz                          |
| FLT   | 13550 Hz                             |
| DELAY | 14.80 usec                           |
| ACQTM | 1.2083 sec                           |
| PD    | 1.7920 sec                           |
| ADBIT | 16                                   |
| RGAIN | 25                                   |
| BF    | 0.10 Hz                              |
| T1    | 0.00                                 |
| T2    | 0.00                                 |
| T3    | 90.00                                |
| T4    | 100.00                               |
| EXMOD | BCM                                  |
| EXPCM | Bilevel.complete.decoupling:Set_IRRF |
| IRNUC | 1H                                   |
| IFR   | 399.65 MHz                           |
| IRSET | 124.00 KHz                           |
| IRFIN | 10500.00 Hz                          |
| IRRPW | 45 usec                              |
| IRATN | 511                                  |
| DFILE | 6.2 Shita C CF3-Sn-Si-COOEt Pd       |
| SF    | TH5ATFG2                             |
| LKSET | 61.60 KHz                            |
| LKFIN | 79.0 Hz                              |
| LKLEV | 180                                  |
| LGAIN | 25                                   |
| LKPHS | 238                                  |
| LKSIG | 1762                                 |
| CSPED | 13 Hz                                |
| FILDC |                                      |
| FILDF |                                      |

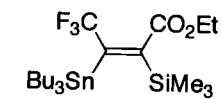

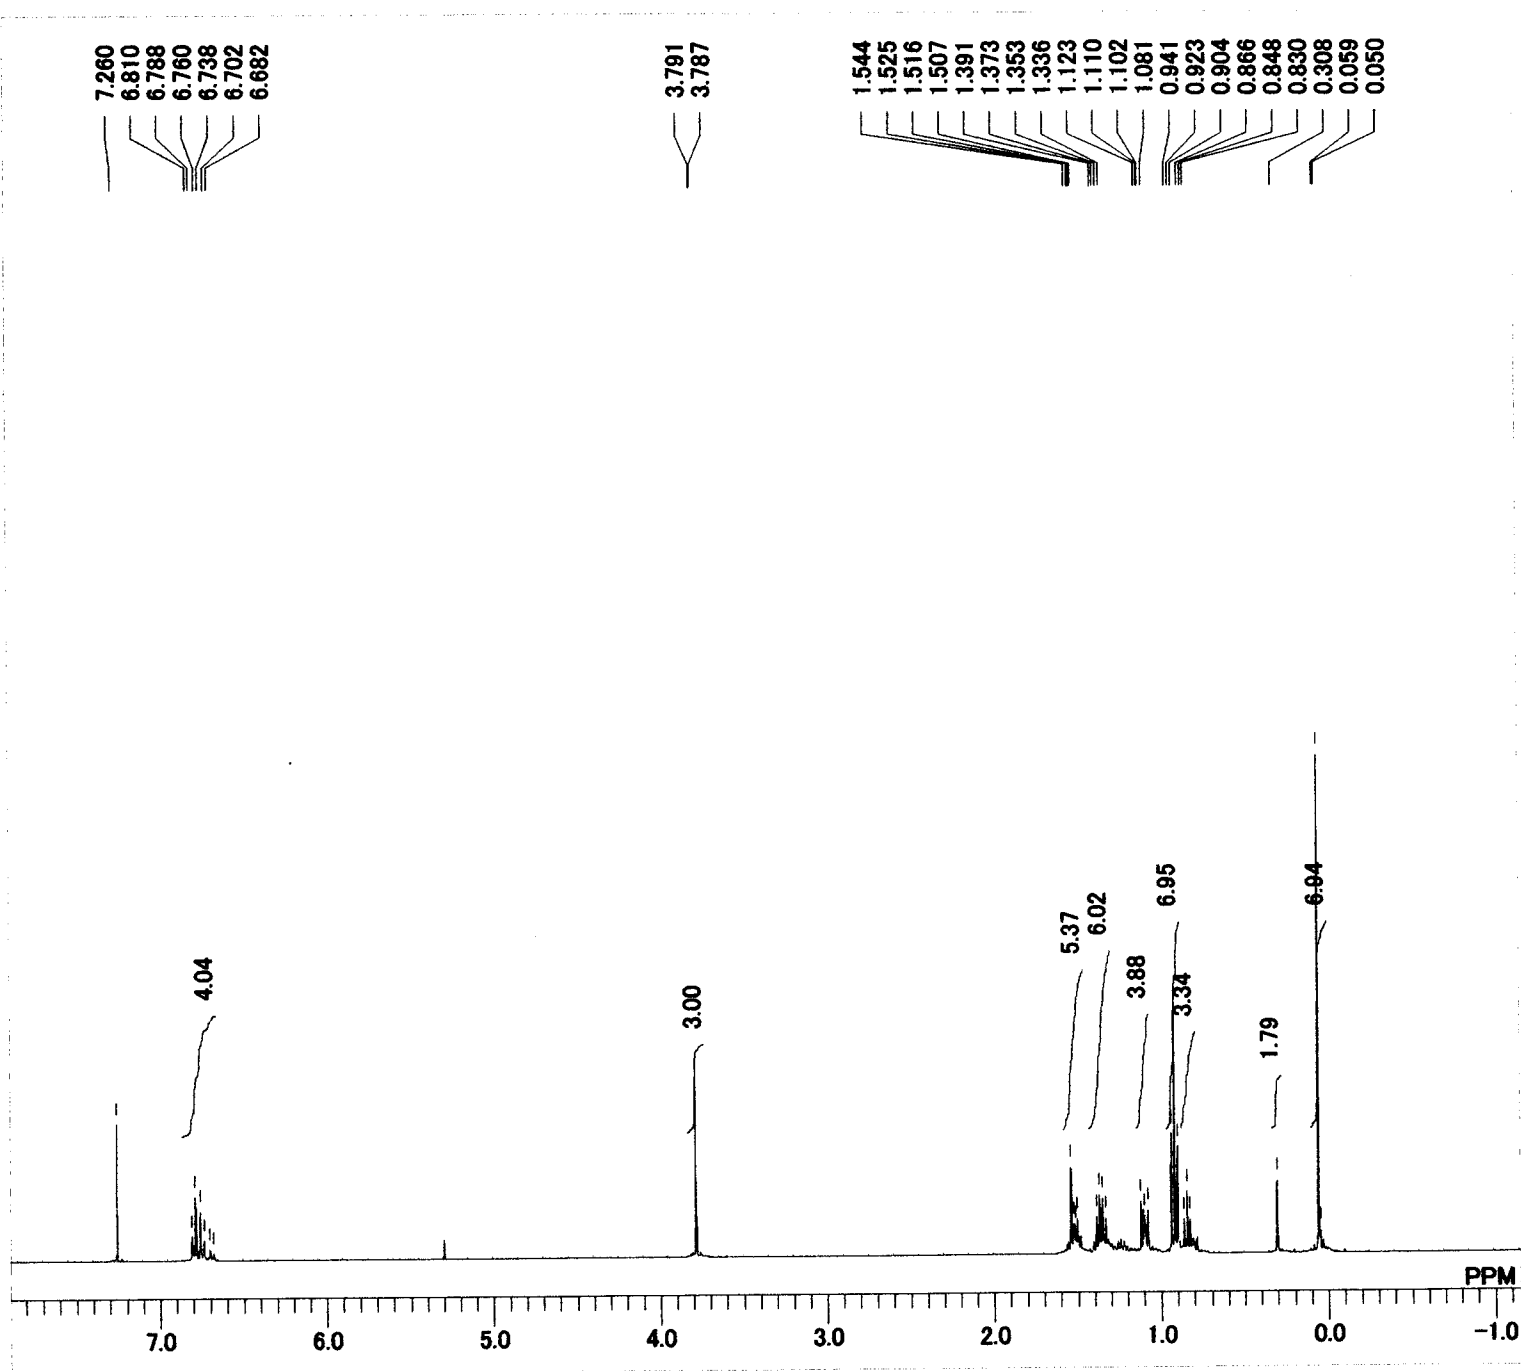

|       |                                 |
|-------|---------------------------------|
| MENUF | 1H                              |
| OBNUC | 1H                              |
| OFR   | 399.65 MHz                      |
| OBSET | 135.40 KHz                      |
| OBFIN | 24.90 Hz                        |
| PW1   | 5.80 usec                       |
| DEADT | 72.10 usec                      |
| PREDL | 0.20000 msec                    |
| IWT   | 1.0000 msec                     |
| POINT | 16384                           |
| SPO   | 16384                           |
| TIMES | 8                               |
| DUMMY | 1                               |
| FREQU | 7992.01 Hz                      |
| FLT   | 4000 Hz                         |
| DELAY | 50.00 usec                      |
| ACQTM | 2.0501 sec                      |
| PD    | 4.9500 sec                      |
| ADBIT | 16                              |
| RGAIN | 17                              |
| BF    | 0.10 Hz                         |
| T1    | 0.00                            |
| T2    | 0.00                            |
| T3    | 90.00                           |
| T4    | 100.00                          |
| EXMOD | NON                             |
| EXPCM | NON:Single.coupled:PW1_ACQTM_PC |
| IRNUC | 1H                              |
| IFR   | 399.65 MHz                      |
| IRSET | 136.90 KHz                      |
| IRFIN | 97.50 Hz                        |
| IRRPW | 45 usec                         |
| IRATN | 511                             |
| DFILE | CF3-ph-p-OMe-Si-Sn (1H) PdNC.a  |
| SF    | TH5ATFG2                        |
| LKSET | 61.60 KHz                       |
| LKFIN | 79.0 Hz                         |
| LKLEV | 180                             |
| LGAIN | 22                              |
| LKPHS | 250                             |
| LKSIG | 804                             |
| CSPED | 11 Hz                           |
| FILDC |                                 |
| FILDF |                                 |

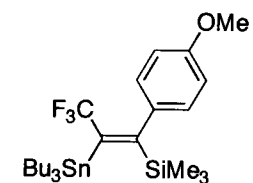

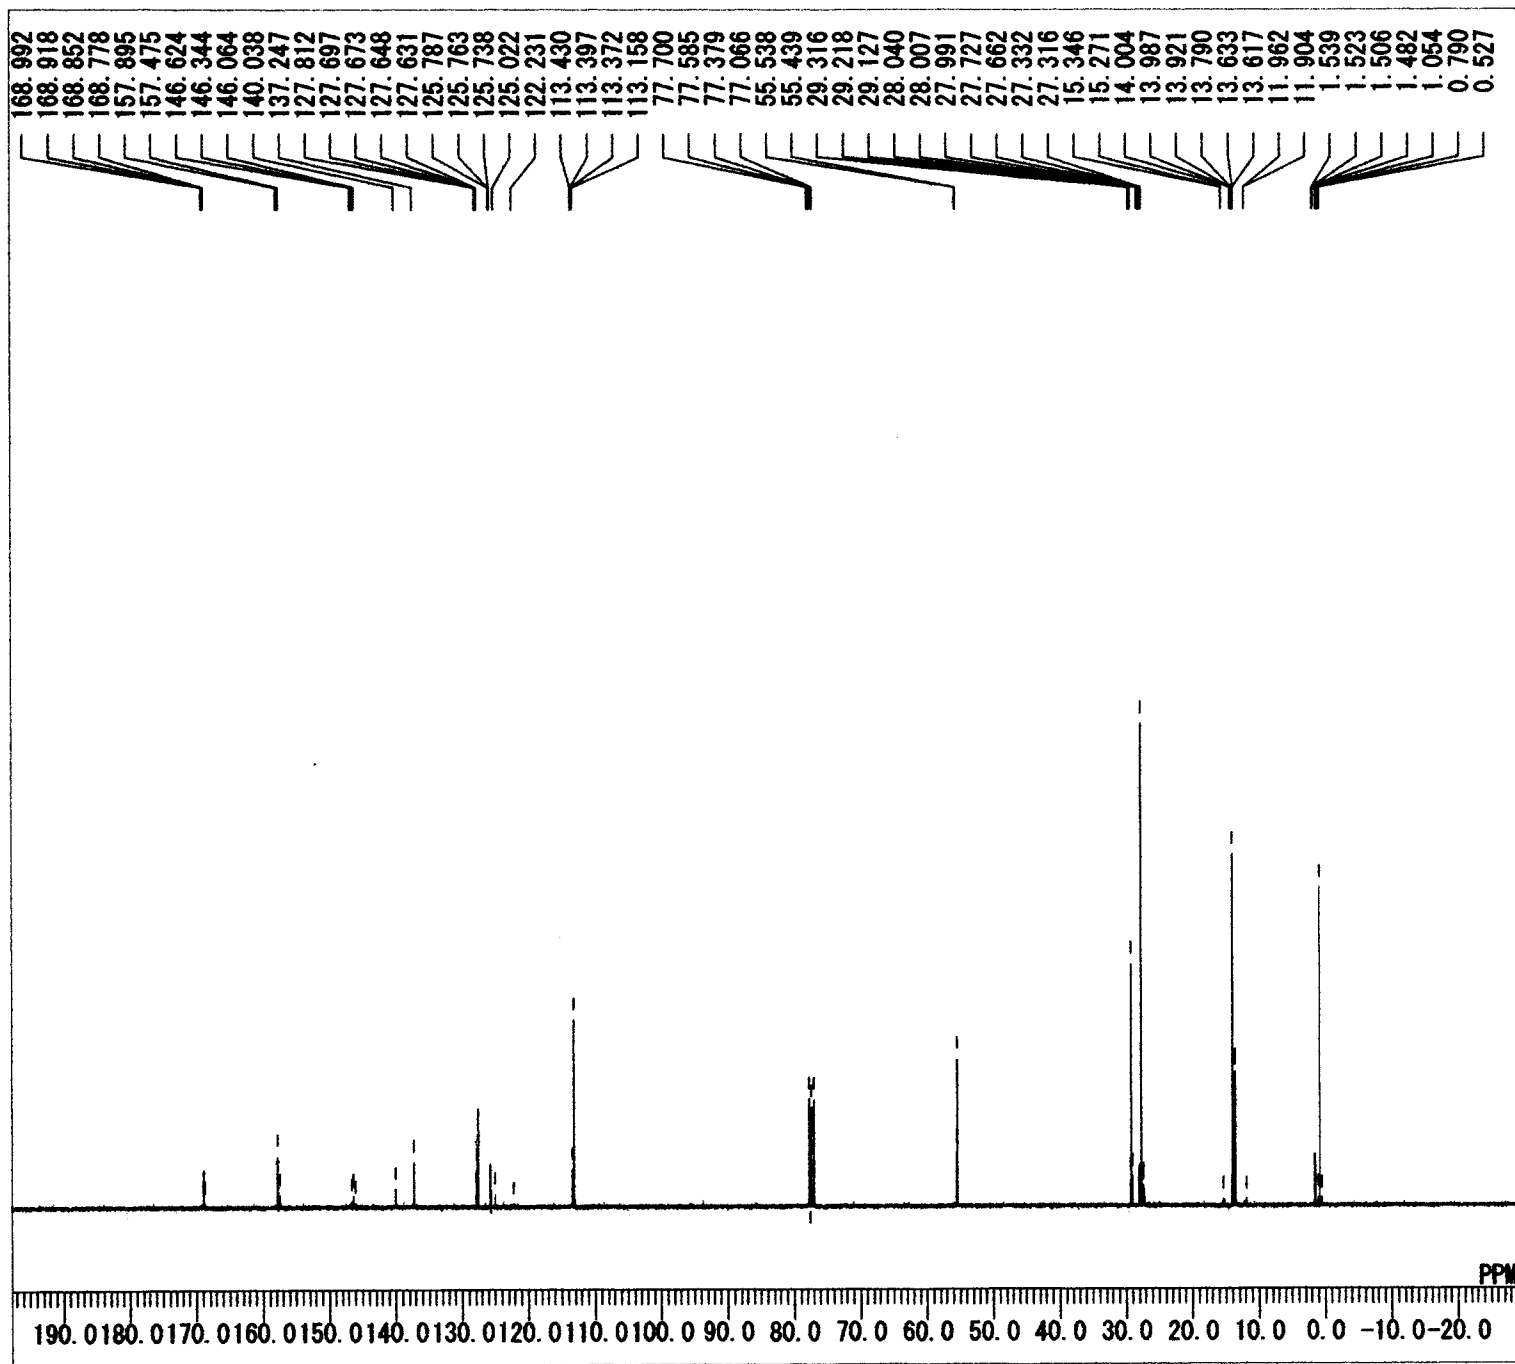

MENUF 13C  
 OBNUC 13C  
 OFR 100.40 MHz  
 OBSET 125.00 KHz  
 OBFIN 10500.00 Hz  
 PW1 6.00 usec  
 DEADT 19.10 usec  
 PREDL 0.20000 msec  
 IWT 1.0000 msec  
 POINT 32768  
 SPO 32768  
 TIMES 600  
 DUMMY 1  
 FREQU 27118.64 Hz  
 FLT 13550 Hz  
 DELAY 14.80 usec  
 ACQTM 1.2083 sec  
 PD 1.7920 sec  
 ADBIT 16  
 RGAIN 25  
 BF 0.10 Hz  
 T1 0.00  
 T2 0.00  
 T3 90.00  
 T4 100.00  
 EXMOD BCM  
 EXPCM Bilevel, complete decoupling:  
 IRNUC 1H  
 IFR 399.65 MHz  
 IRSET 124.00 KHz  
 IRFIN 10500.00 Hz  
 IRRPW 45 usec  
 IRATN 511  
 DFILE CF3-ph-p-OMe-Si-Sn (13C) PdN  
 SF TH5ATFG2  
 LKSET 61.60 KHz  
 LKFIN 79.0 Hz  
 LKLEV 180  
 LGAIN 24  
 LKPHS 250  
 LKSIG 1215  
 GSPED 13 Hz  
 FILDC  
 FILDF

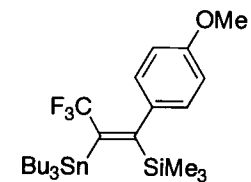

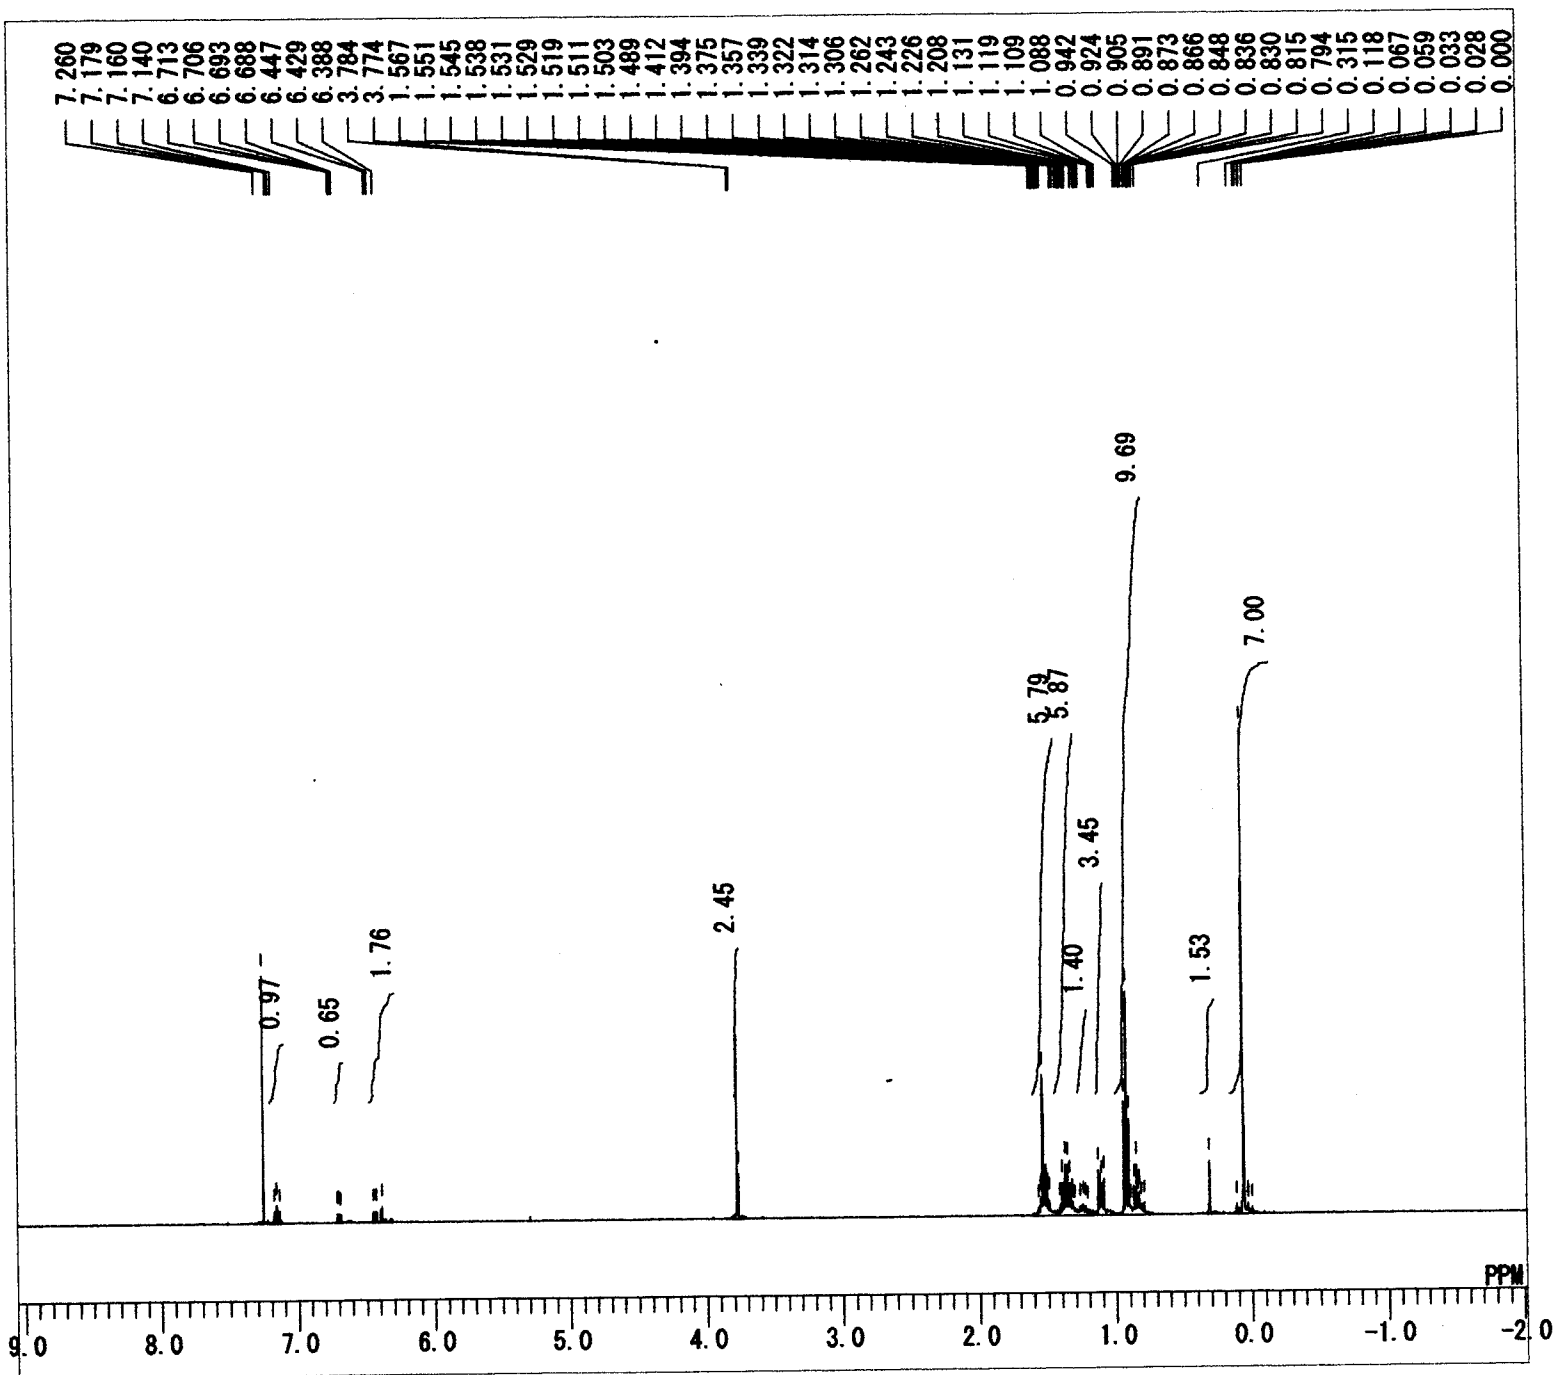

MENUF 1H  
 OBNUC 1H  
 OFR 399.65 MHz  
 OBSET 135.40 KHz  
 OBFIN 24.90 Hz  
 PW1 5.80 usec  
 DEADT 72.10 usec  
 PREDL 0.2000 msec  
 IWT 1.0000 msec  
 POINT 16384  
 SPO 16384  
 TIMES 8  
 DUMMY 1  
 FREQU 7992.01 Hz  
 FLT 4000 Hz  
 DELAY 50.00 usec  
 ACQTM 2.0501 sec  
 PD 4.9500 sec  
 ADBIT 16  
 RGAIN 19  
 BF 0.10 Hz  
 T1 0.00  
 T2 0.00  
 T3 90.00  
 T4 100.00  
 EXMOD NON  
 EXPCM NON:Single.coupled:PW1\_ACQTM  
 IRNUC 1H  
 IFR 399.65 MHz  
 IRSET 136.90 KHz  
 IRFIN 97.50 Hz  
 IRRPW 45 usec  
 IRATN 511  
 DFILE CF3-ph-m-OMe-Si-Sn (1H) PdNC.  
 SF TH5ATFG2  
 LKSET 61.60 KHz  
 LKFIN 79.0 Hz  
 LKLEV 180  
 LGAIN 25  
 LKPHS 250  
 LKSIG 1991  
 CSPED 13 Hz  
 FILDC  
 FILDF

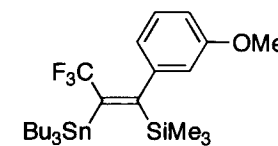

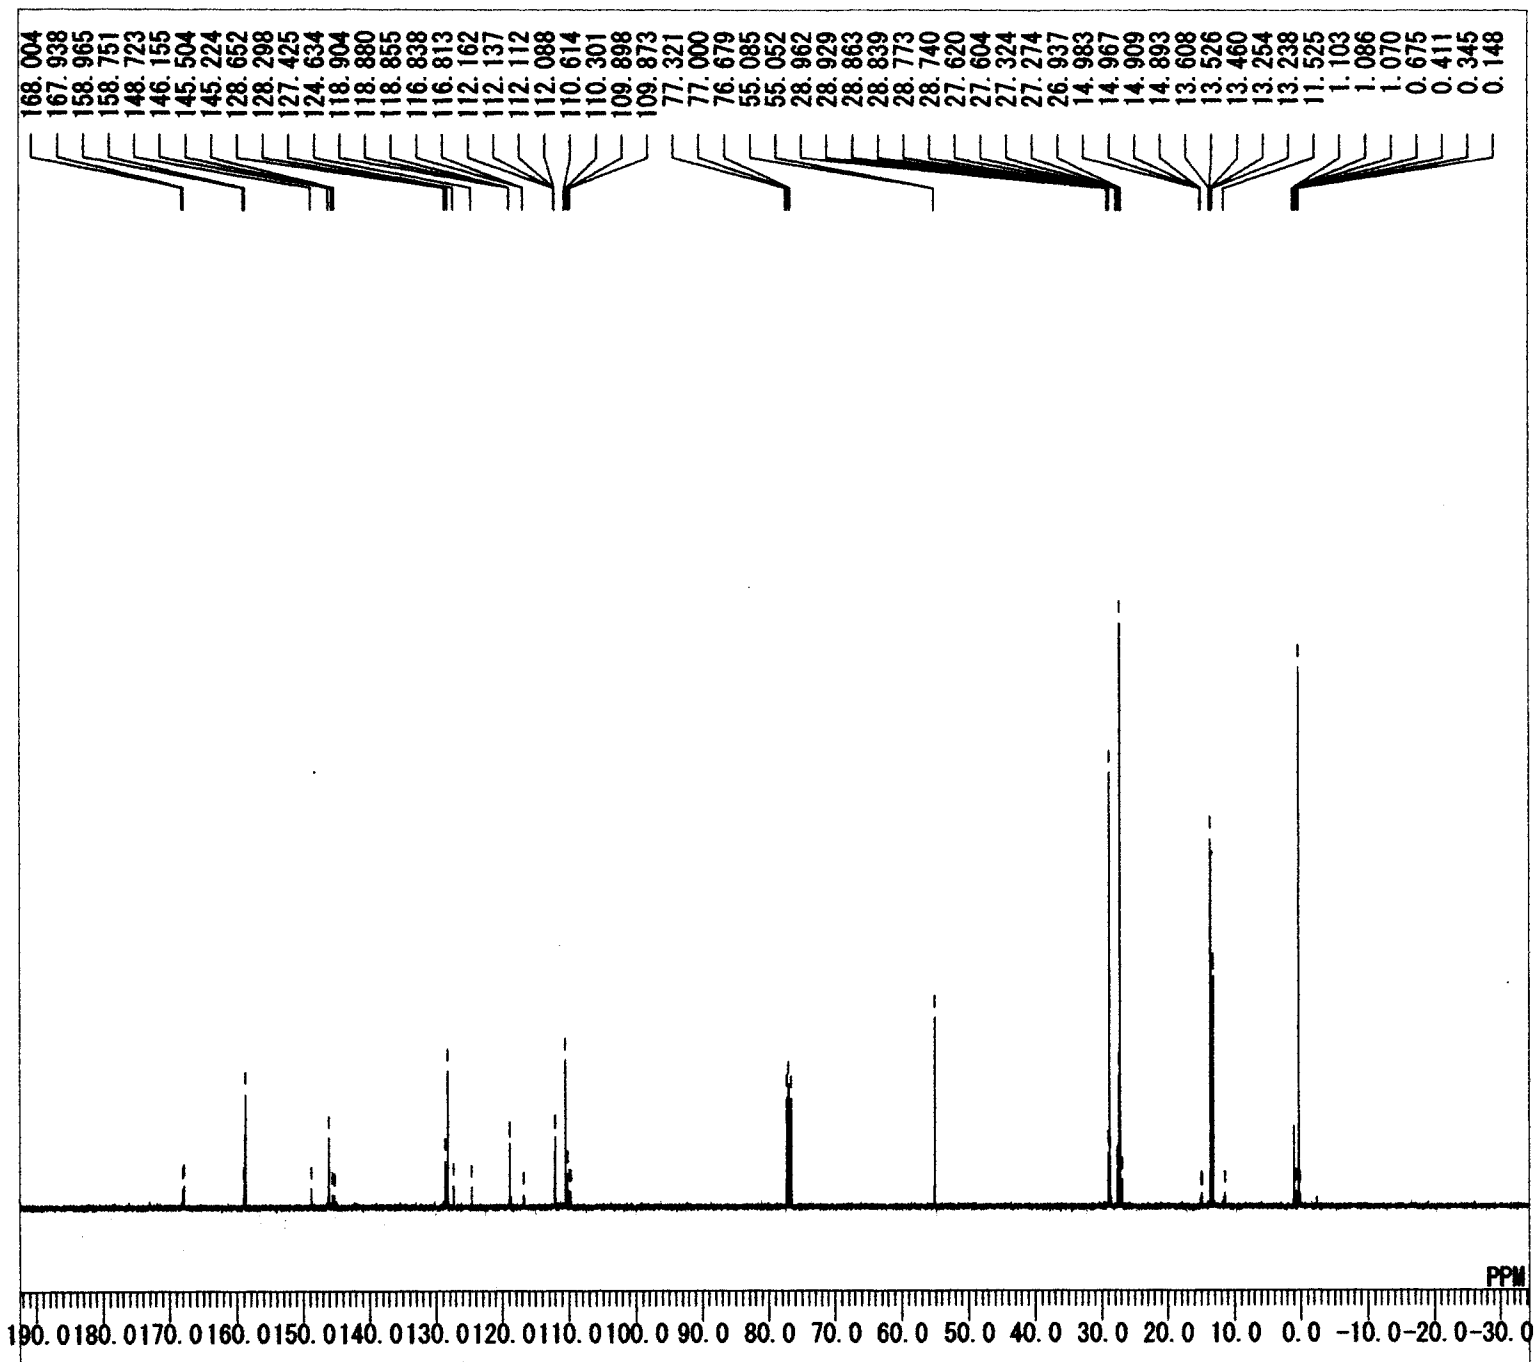

```

MENUF 13C
OBNUC 13C
OFR 100.40 MHz
OBSET 125.00 KHz
OBFIN 10500.00 Hz
PW1 6.00 usec
DEADT 19.10 usec
PREDL 0.20000 msec
IWT 1.0000 msec
POINT 32768
SPO 32768
TIMES 512
DUMMY 1
FREQU 27118.64 Hz
FLT 13550 Hz
DELAY 14.80 usec
ACQTM 1.2083 sec
PD 1.7920 sec
ADBIT 16
RGAIN 25
BF 0.10 Hz
T1 0.00
T2 0.00
T3 90.00
T4 100.00
EXMOD BCM
EXPCM Bi level. complete. decoupling:
IRNUC 1H
IFR 399.65 MHz
IRSET 124.00 KHz
IRFIN 10500.00 Hz
IRRPW 45 usec
IRATN 511
DFILE CF3-ph-m-OMe-Si-Sn (13C) PdN
SF TH5ATFG2
LKSET 61.60 KHz
LKFIN 79.0 Hz
LKLEV 180
LGAIN 24
LKPHS 250
LKSIG 838
CSPED 12 Hz
FILDC
FILDF
    
```

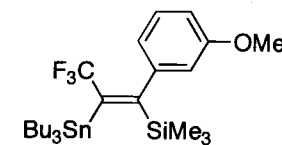



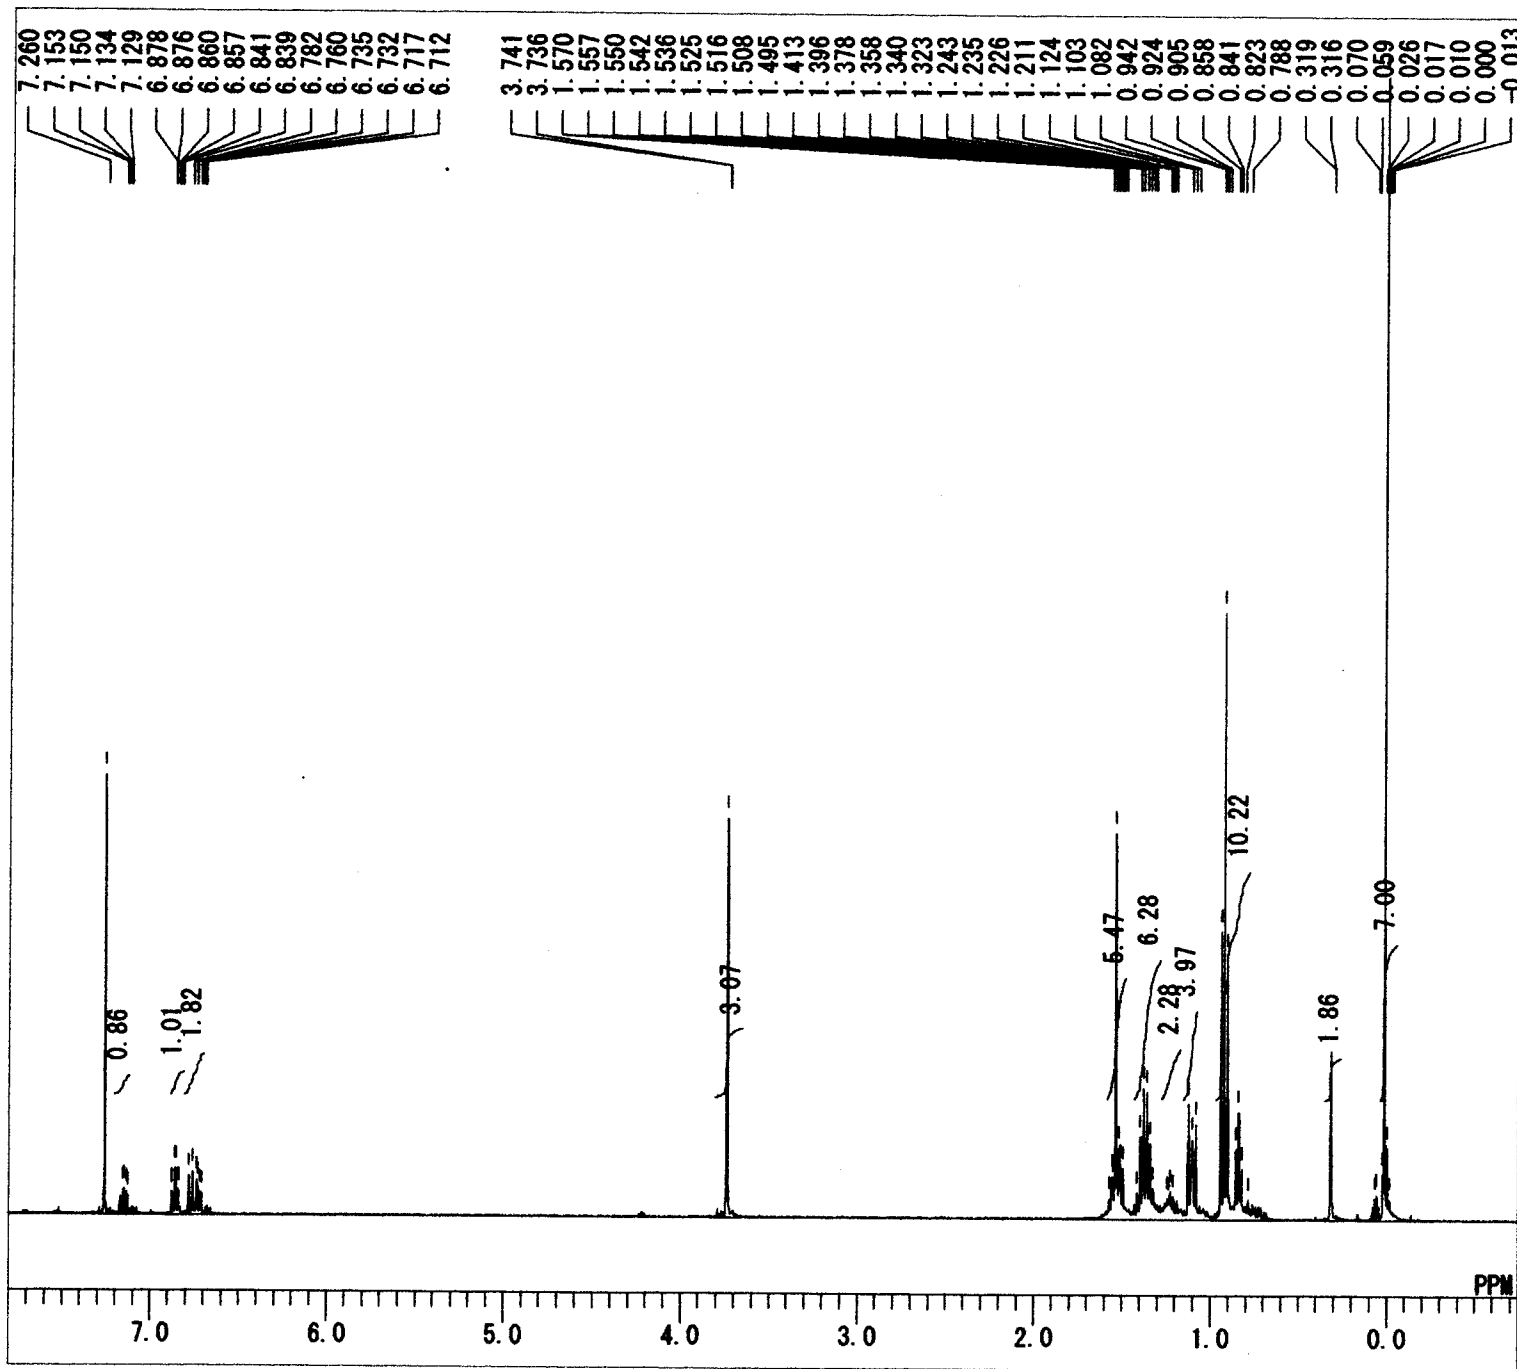

MENUF 1H  
 OBNUC 1H  
 OFR 399.65 MHz  
 OBSET 135.40 KHz  
 OBFIN 24.90 Hz  
 PW1 5.80 usec  
 DEAT 72.10 usec  
 PREDL 0.20000 msec  
 IWT 1.0000 msec  
 POINT 16384  
 SPO 16384  
 TIMES 8  
 DUMMY 1  
 FREQU 7992.01 Hz  
 FLT 4000 Hz  
 DELAY 50.00 usec  
 ACQTM 2.0501 sec  
 PD 4.9500 sec  
 ADBIT 16  
 RGAIN 18  
 BF 0.10 Hz  
 T1 0.00  
 T2 0.00  
 T3 90.00  
 T4 100.00  
 EXMOD NON  
 EXPCM NON:Single.coupled:PW1\_ACQTM  
 IRNUC 1H  
 IFR 399.65 MHz  
 IRSET 136.90 KHz  
 IRFIN 97.50 Hz  
 IRRPW 45 usec  
 IRATN 511  
 DFILE CF3-ph-o-OMe-Si-Me3 (1H) PdNC.  
 SF TH5ATFG2  
 LKSET 61.60 KHz  
 LKFIN 79.0 Hz  
 LKLEV 180  
 LGAIN 21  
 LKPHS 250  
 LKSIG 658  
 CSPED 12 Hz  
 FILDC  
 FILDF

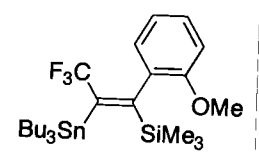

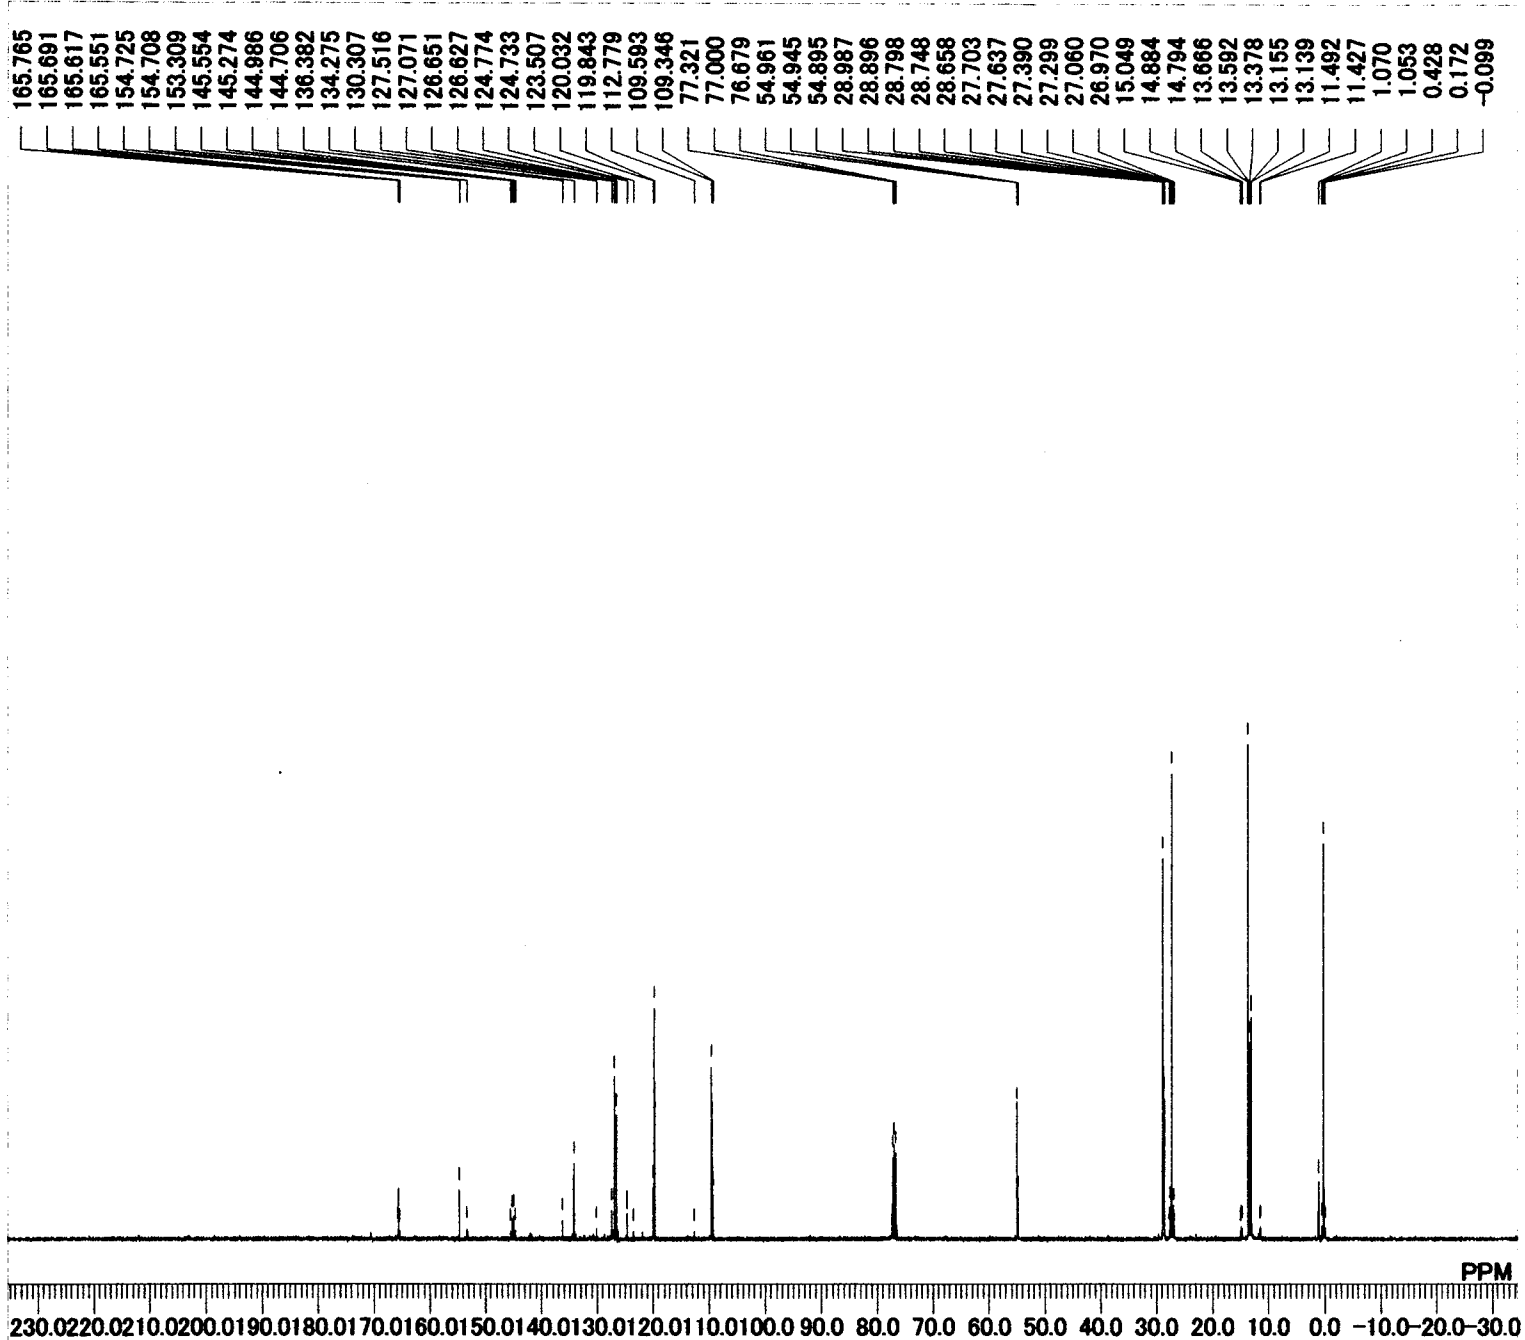

MENUF 13C  
OBNUC 13C  
OFR 100.40 MHz  
OBSET 125.00 KHz  
OBFIN 10500.00 Hz  
PW1 6.20 usec  
DEADT 19.00 usec  
PREDL 0.20000 msec  
IWT 1.0000 msec  
POINT 32768  
SPO 32768  
TIMES 20000  
DUMMY 1  
FREQU 27118.64 Hz  
FLT 13550 Hz  
DELAY 14.80 usec  
ACQTM 1.2083 sec  
PD 1.7920 sec  
ADBIT 16  
RGAIN 24  
BF 0.10 Hz  
T1 0.00  
T2 0.00  
T3 90.00  
T4 100.00  
EXMOD BCM  
EXPCM Bilevel.complete.decoupling:Set\_IRRF  
IRNUC 1H  
IFR 399.65 MHz  
IRSET 124.00 KHz  
IRFIN 10500.00 Hz  
IRRPW 45 usec  
IRATN 511  
DFILE \_DEFAULT.ALS  
SF TH5ATFG2  
LKSET 61.60 KHz  
LKFIN 79.0 Hz  
LKLEV 180  
LGAIN 24  
LKPHS 150  
LKSIG 311  
CSPED 13 Hz  
FILDC  
FILDF

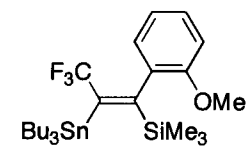

C:\WINNMR\DATA\Fluorine\*きぬがわ\*ひとまず\Rxn. 309H. als

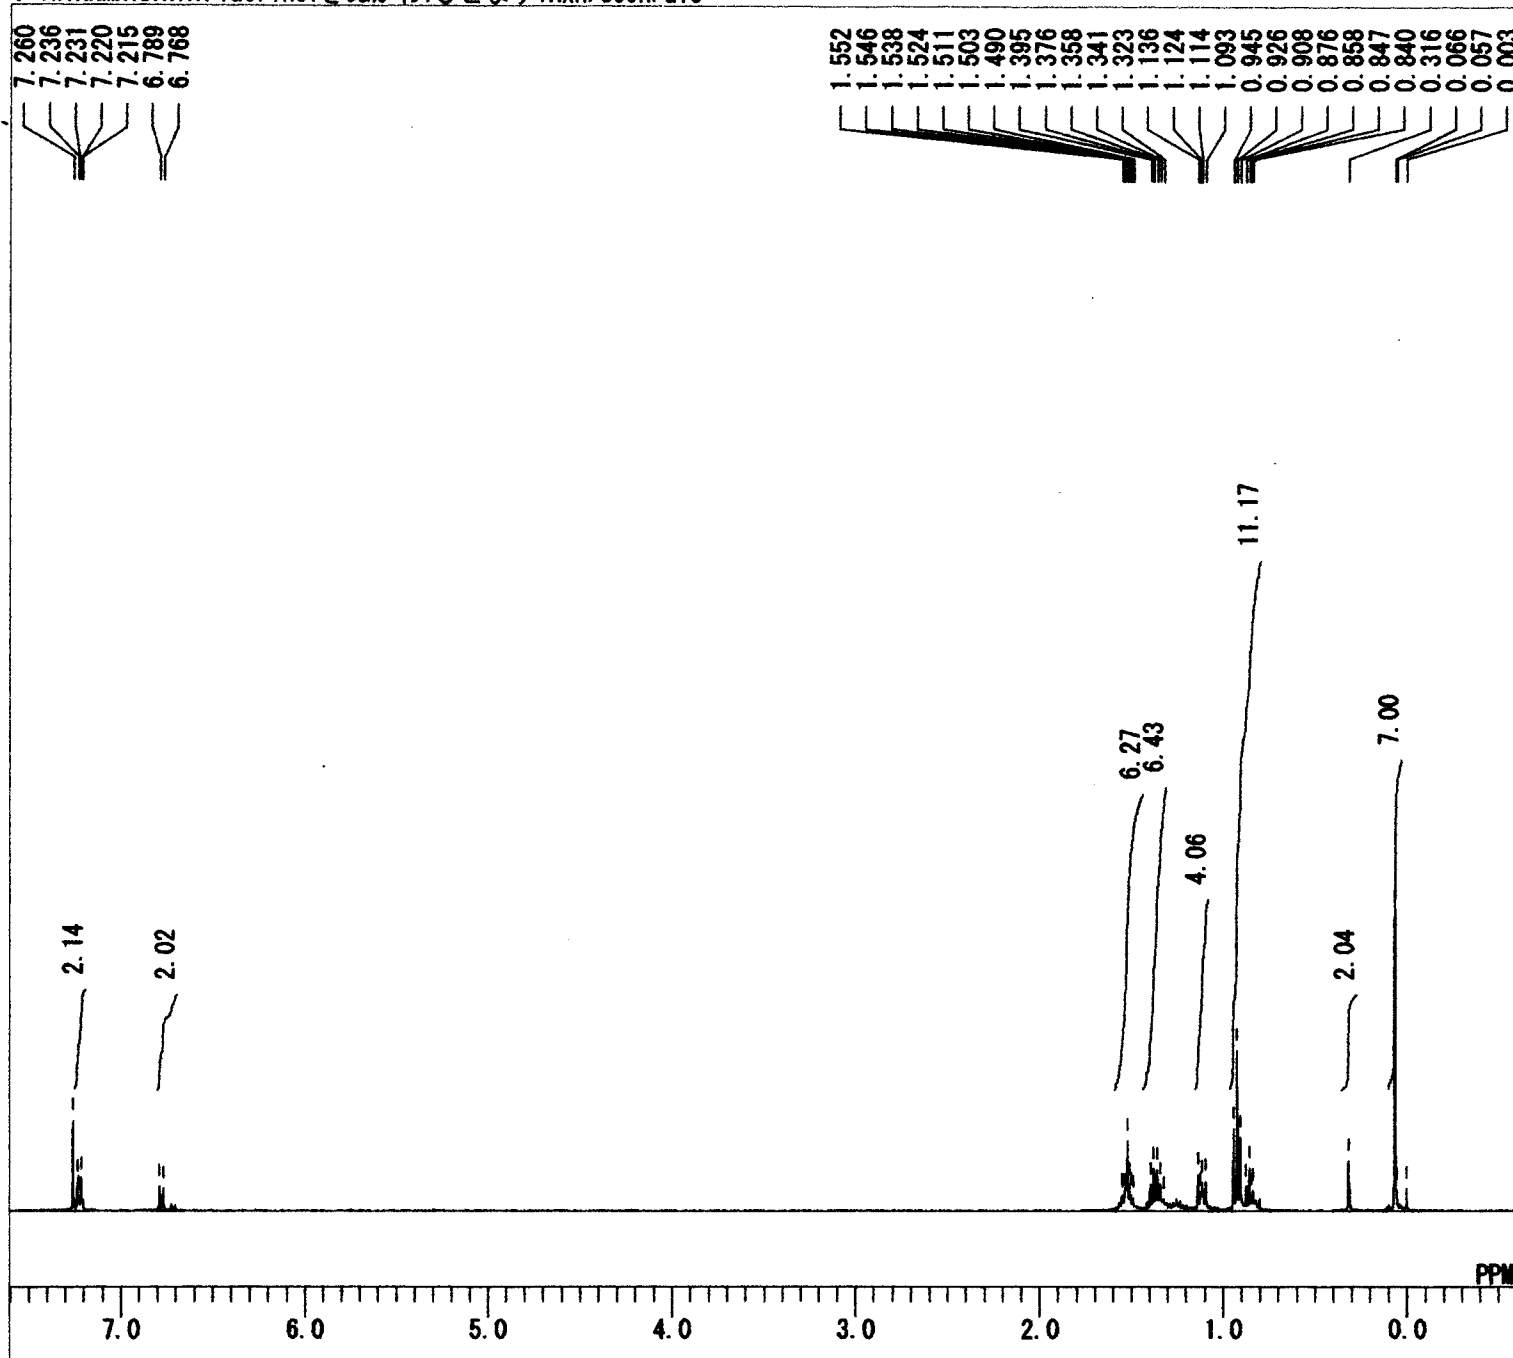

|       |                              |
|-------|------------------------------|
| MENUF | 1H                           |
| OBNUC | 1H                           |
| OFR   | 399.65 MHz                   |
| OBSET | 135.40 KHz                   |
| OBFIN | 24.90 Hz                     |
| PW1   | 5.80 usec                    |
| DEADT | 72.10 usec                   |
| PREDL | 0.20000 msec                 |
| IWT   | 1.0000 msec                  |
| POINT | 16384                        |
| SPO   | 16384                        |
| TIMES | 8                            |
| DUMMY | 1                            |
| FREQU | 7992.01 Hz                   |
| FLT   | 4000 Hz                      |
| DELAY | 50.00 usec                   |
| ACQTM | 2.0501 sec                   |
| PD    | 4.9500 sec                   |
| ADBIT | 16                           |
| RGAIN | 20                           |
| BF    | 0.60 Hz                      |
| T1    | 0.00                         |
| T2    | 0.00                         |
| T3    | 90.00                        |
| T4    | 100.00                       |
| EXMOD | NON                          |
| EXPCM | NON:Single.coupled:PW1_ACQTM |
| IRNUC | 1H                           |
| IFR   | 399.65 MHz                   |
| IRSET | 136.90 KHz                   |
| IRFIN | 97.50 Hz                     |
| IRRPW | 45 usec                      |
| IRATN | 511                          |
| DFILE | Rxn. 309H. als               |
| SF    | TH5ATFG2                     |
| LKSET | 61.60 KHz                    |
| LKFIN | 79.0 Hz                      |
| LKLEV | 180                          |
| LGAIN | 25                           |
| LKPHS | 250                          |
| LKSIG | 1604                         |
| CSPED | 14 Hz                        |
| FILDC |                              |
| FILDF |                              |

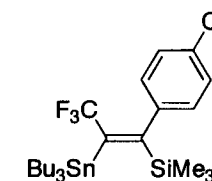

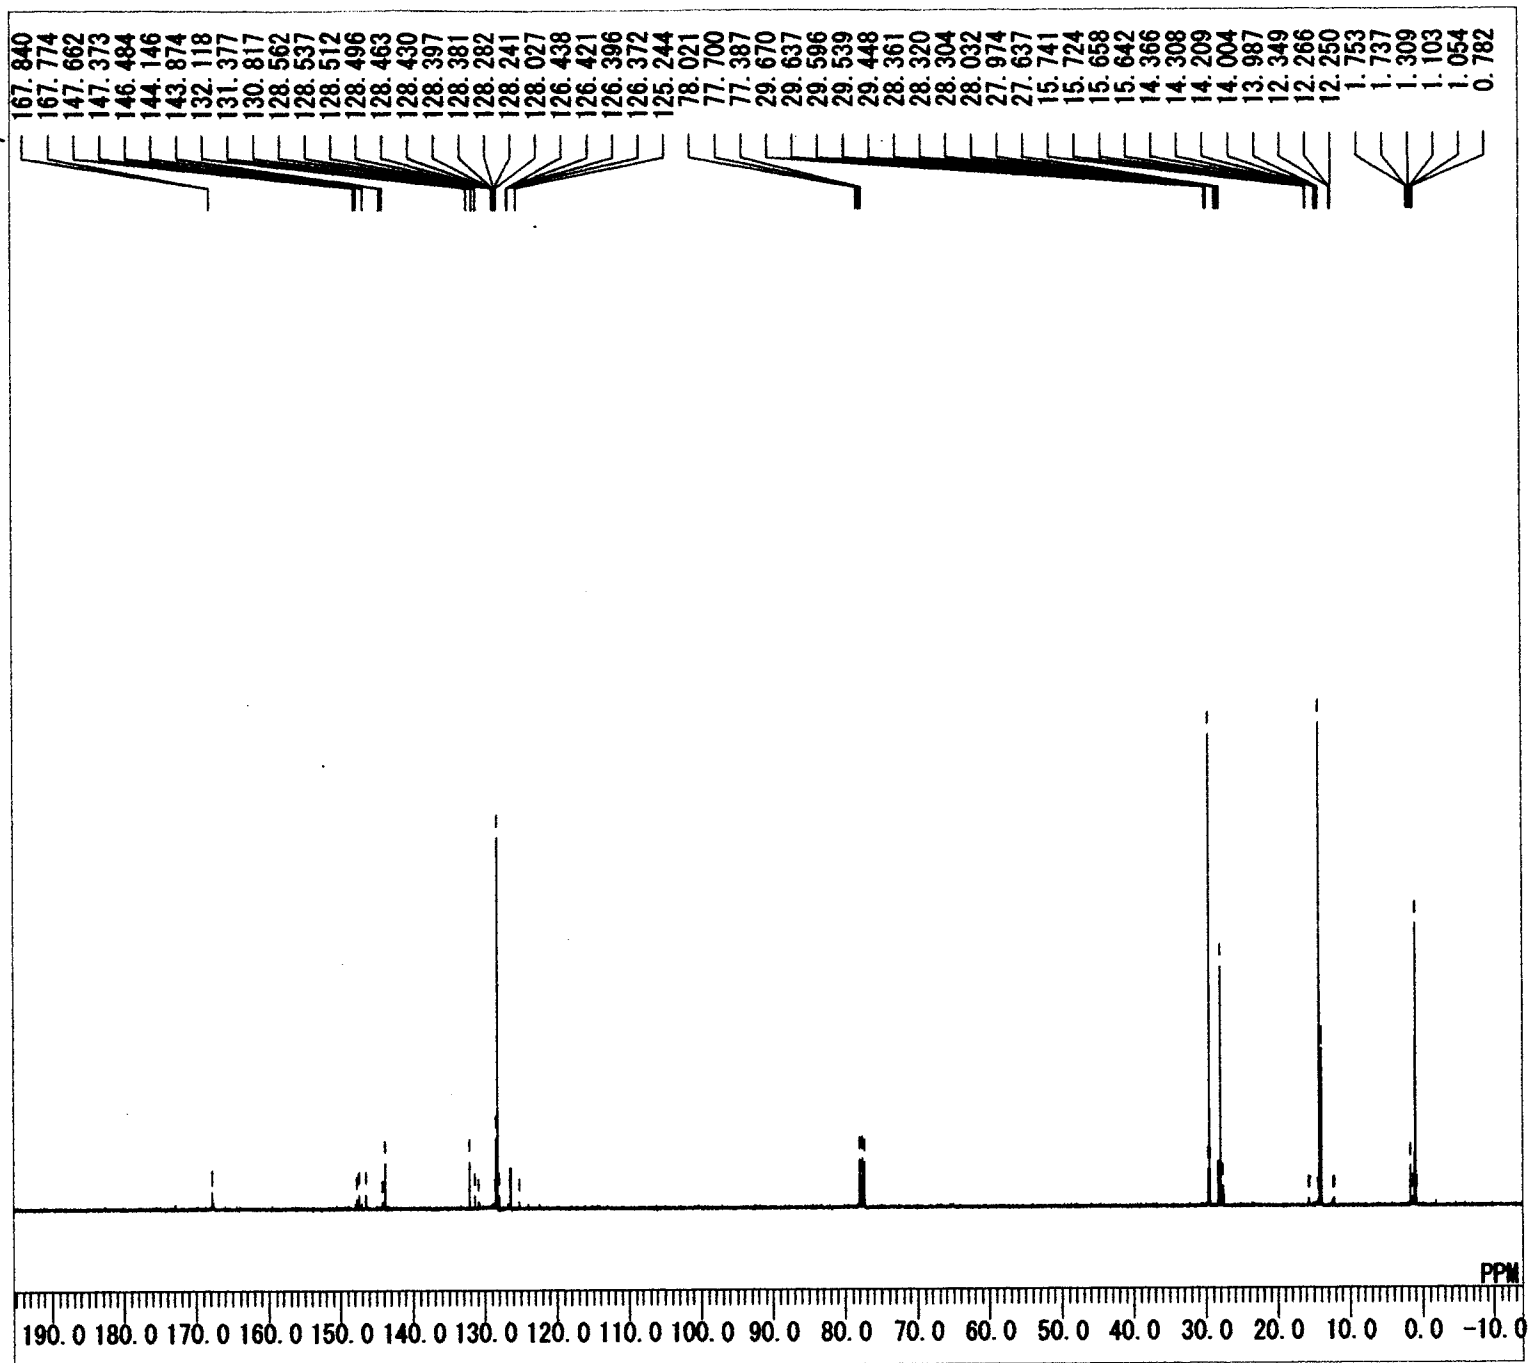

MENUF 13C  
 OBNUC 13C  
 OFR 100.40 MHz  
 OBSET 125.00 KHz  
 OFBIN 10500.00 Hz  
 PW1 6.00 usec  
 DEADT 19.10 usec  
 PREDL 0.20000 msec  
 IWT 1.0000 msec  
 POINT 32768  
 SPO 32768  
 TIMES 256  
 DUMMY 1  
 FREQU 27118.64 Hz  
 FLT 13550 Hz  
 DELAY 14.80 usec  
 ACQTM 1.2083 sec  
 PD 1.7920 sec  
 ADBIT 16  
 RGAIN 24  
 BF 0.10 Hz  
 T1 0.00  
 T2 0.00  
 T3 90.00  
 T4 100.00  
 EXMOD BCM  
 EXPCM Bi level. complete. decoupling:  
 IRNUC 1H  
 IFR 399.65 MHz  
 IRSET 124.00 KHz  
 IRFIN 10500.00 Hz  
 IRRPW 45 usec  
 IRATN 511  
 DF FILE DEFAULT. ALS  
 SF TH5ATFG2  
 LKSET 61.60 KHz  
 LKFIN 79.0 Hz  
 LKLEV 180  
 LGAIN 26  
 LKPHS 250  
 LKSIG 1561  
 CSPED 13 Hz  
 FILDC  
 FILDF

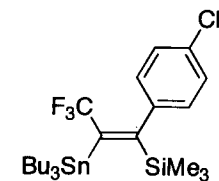

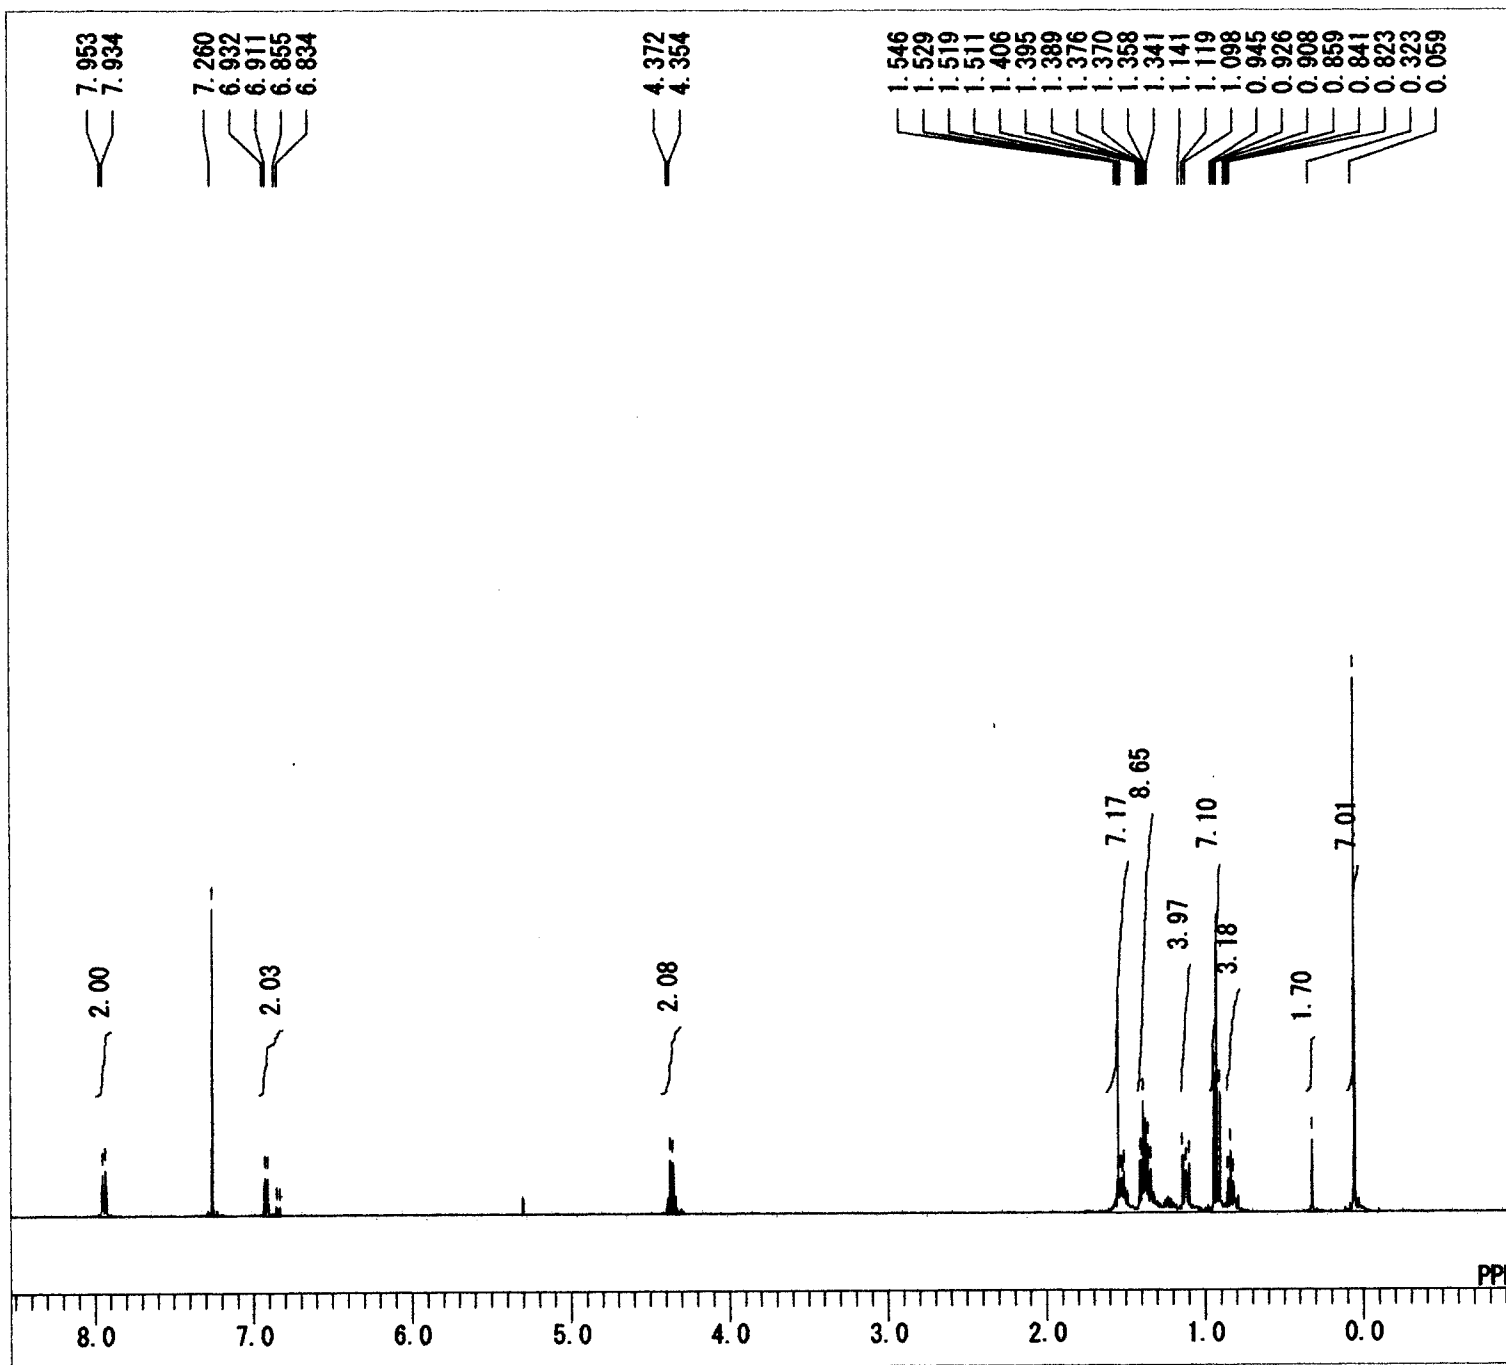

```

MENUF 1H
OBNUC 1H
OFR 399.65 MHz
OBSET 135.40 KHz
OBFIN 24.90 Hz
PW1 5.80 usec
DEADT 72.10 usec
PREDL 0.20000 msec
IWT 1.0000 msec
POINT 16384
SPO 16384
TIMES 8
DUMMY 1
FREQU 7992.01 Hz
FLT 4000 Hz
DELAY 50.00 usec
ACQTM 2.0501 sec
PD 4.9500 sec
ADBIT 16
RGAIN 19
BF 0.10 Hz
T1 0.00
T2 0.00
T3 90.00
T4 100.00
EXMOD NON
EXPCM NON:Single.coupled:PW1_ACQTM.
IRNUC 1H
IFR 399.65 MHz
IRSET 136.90 KHz
IRFIN 97.50 Hz
IRRPW 45 usec
IRATN 511
DFILE CF3-ph-p-CO2Et-Si-Sn (1H) Pd
SF TH5ATFG2
LKSET 61.60 KHz
LKFIN 79.0 Hz
LKLEV 180
LGAIN 23
LKPHS 250
LKSIG 1126
CSPED 11 Hz
FILDC
FILDF
    
```

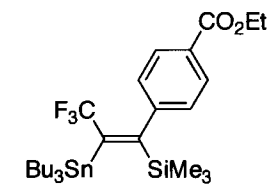

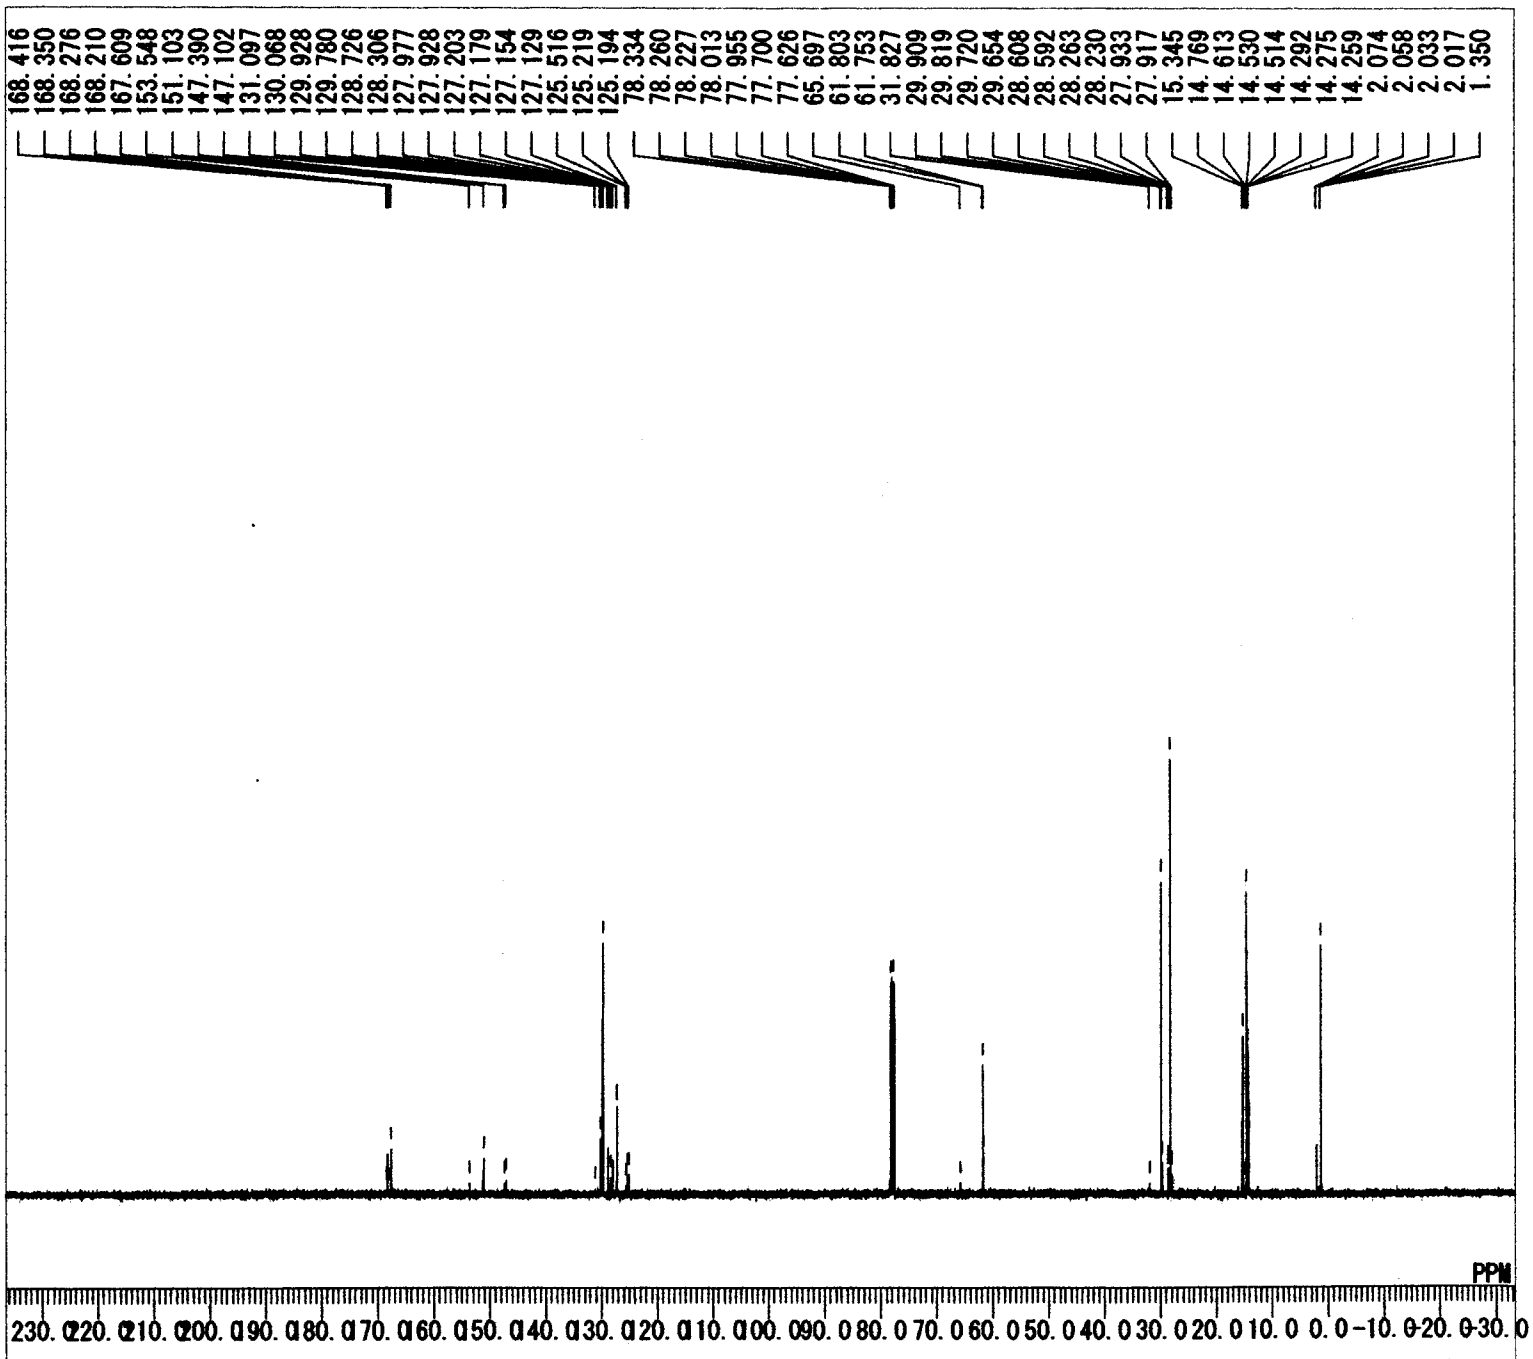

MENUF 13C  
 OBNUC 13C  
 OFR 100.40 MHz  
 OBSET 125.00 KHz  
 OBFIN 10500.00 Hz  
 PW1 6.00 usec  
 DEADT 19.10 usec  
 PREDL 0.20000 msec  
 IWT 1.0000 msec  
 POINT 32768  
 SPO 32768  
 TIMES 512  
 DUMMY 1  
 FREQU 27118.64 Hz  
 FLT 13550 Hz  
 DELAY 14.80 usec  
 ACQTM 1.2083 sec  
 PD 1.7920 sec  
 ADBIT 16  
 RGAIN 25  
 BF 0.10 Hz  
 T1 0.00  
 T2 0.00  
 T3 90.00  
 T4 100.00  
 EXMOD BCM  
 EXPCM Bilevel, complete decoupling: (1H  
 IRNUC 1H  
 IFR 399.65 MHz  
 IRSET 124.00 KHz  
 IRFIN 10500.00 Hz  
 IRRPW 45 usec  
 IRATN 511  
 DFILE CF3-ph-p-CO2Et-Si-Sn (13C) P TH5ATFG2  
 SF  
 LKSET 61.60 KHz  
 LKFIN 79.0 Hz  
 LKLEV 180  
 LGAIN 23  
 LKPHS 250  
 LKSIG 751  
 CSPED 14 Hz  
 FILDC  
 FILDF

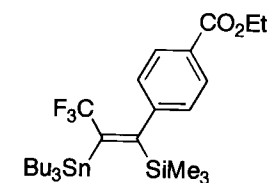

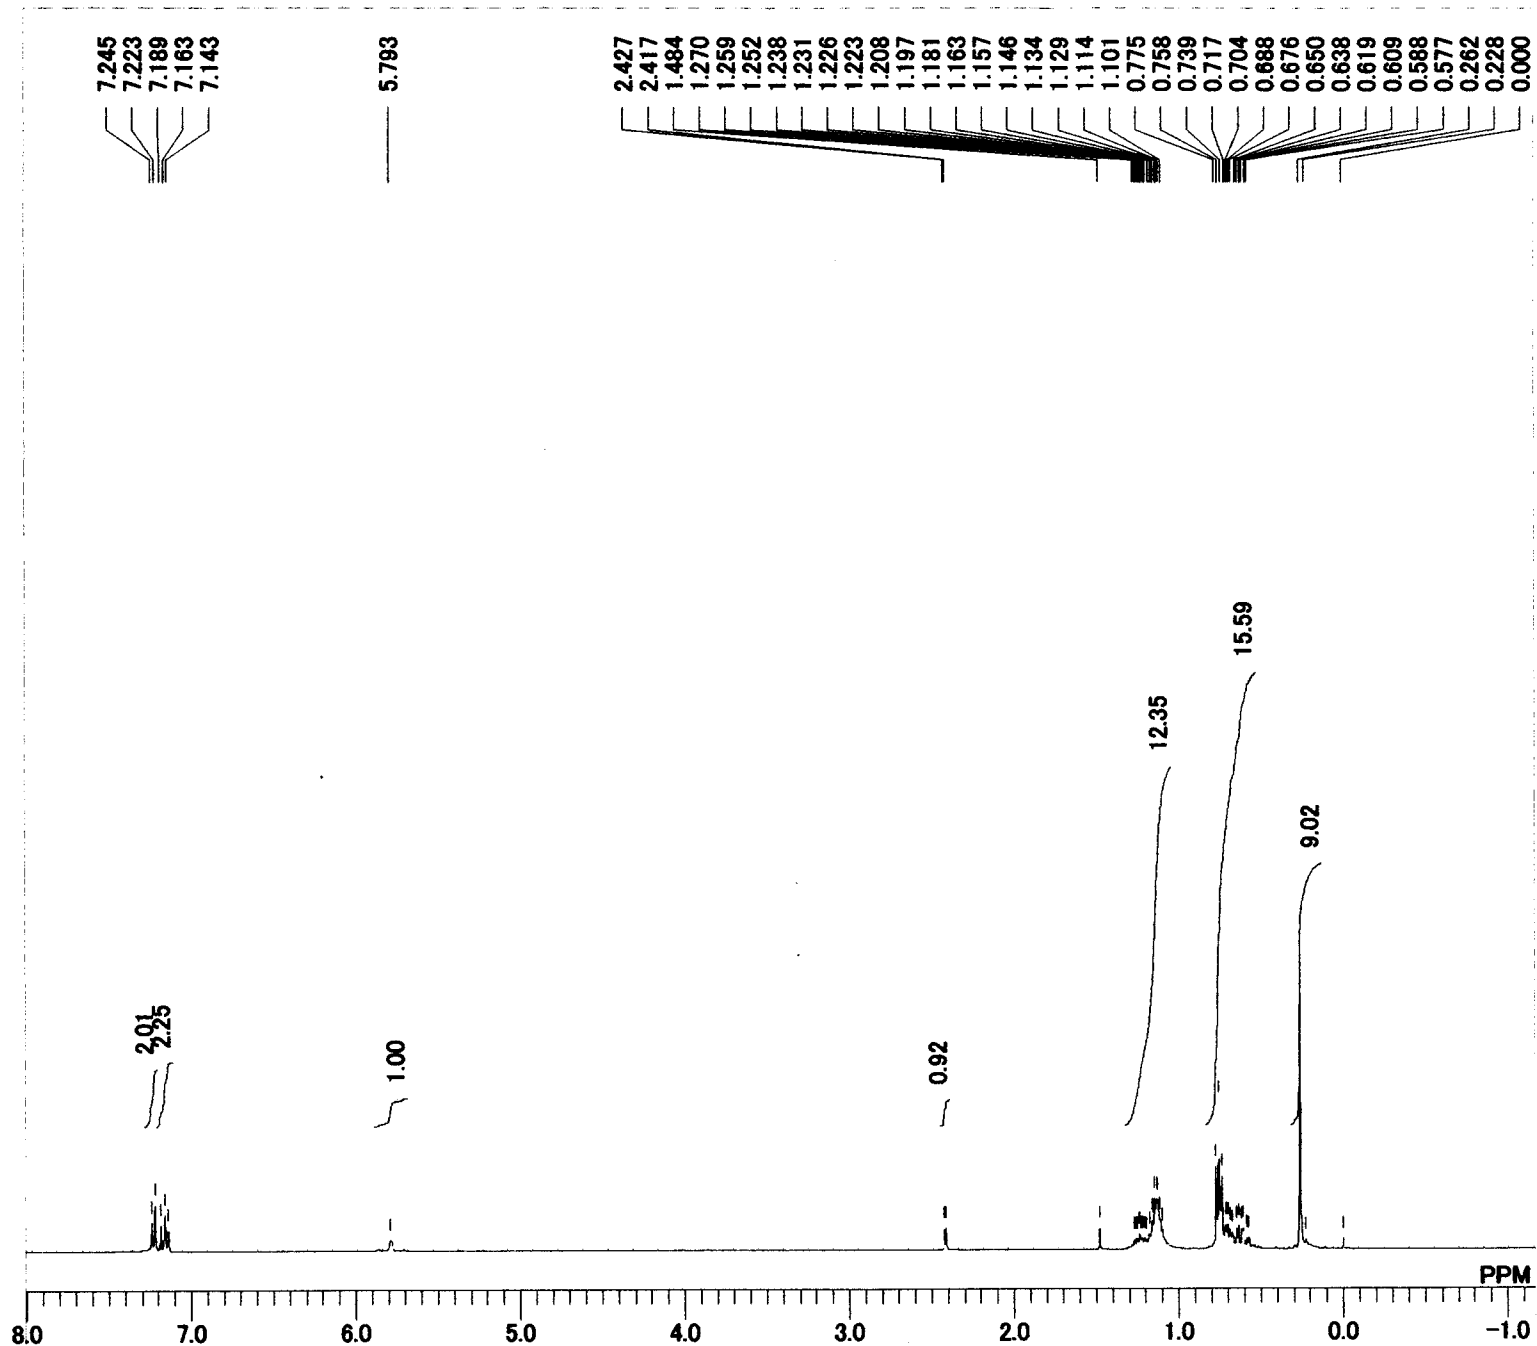

|       |                                 |
|-------|---------------------------------|
| MENUF | 1H                              |
| OBNUC | 1H                              |
| OFR   | 399.65 MHz                      |
| OBSET | 135.40 KHz                      |
| OBFIN | 24.90 Hz                        |
| PW1   | 5.80 usec                       |
| DEADT | 72.10 usec                      |
| PREDL | 0.20000 msec                    |
| IWT   | 1.0000 msec                     |
| POINT | 16384                           |
| SPO   | 16384                           |
| TIMES | 8                               |
| DUMMY | 1                               |
| FREQU | 7992.01 Hz                      |
| FLT   | 4000 Hz                         |
| DELAY | 50.00 usec                      |
| ACQTM | 2.0501 sec                      |
| PD    | 4.9500 sec                      |
| ADBIT | 16                              |
| RGAIN | 14                              |
| BF    | 0.60 Hz                         |
| T1    | 0.00                            |
| T2    | 0.00                            |
| T3    | 90.00                           |
| T4    | 100.00                          |
| EXMOD | NON                             |
| EXPCM | NON:Single.coupled:PW1_ACQTM_PC |
| IRNUC | 1H                              |
| IFR   | 399.65 MHz                      |
| IRSET | 136.90 KHz                      |
| IRFIN | 97.50 Hz                        |
| IRRPW | 45 usec                         |
| IRATN | 511                             |
| DFILE | Rxn.326 H ue.als                |
| SF    | TH5ATFG2                        |
| LKSET | 61.60 KHz                       |
| LKFIN | 79.0 Hz                         |
| LKLEV | 180                             |
| LGAIN | 23                              |
| LKPHS | 250                             |
| LKSIG | 1065                            |
| CSPED | 14 Hz                           |
| FILDC |                                 |
| FILDF |                                 |

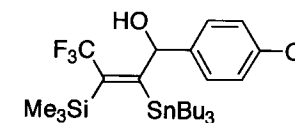

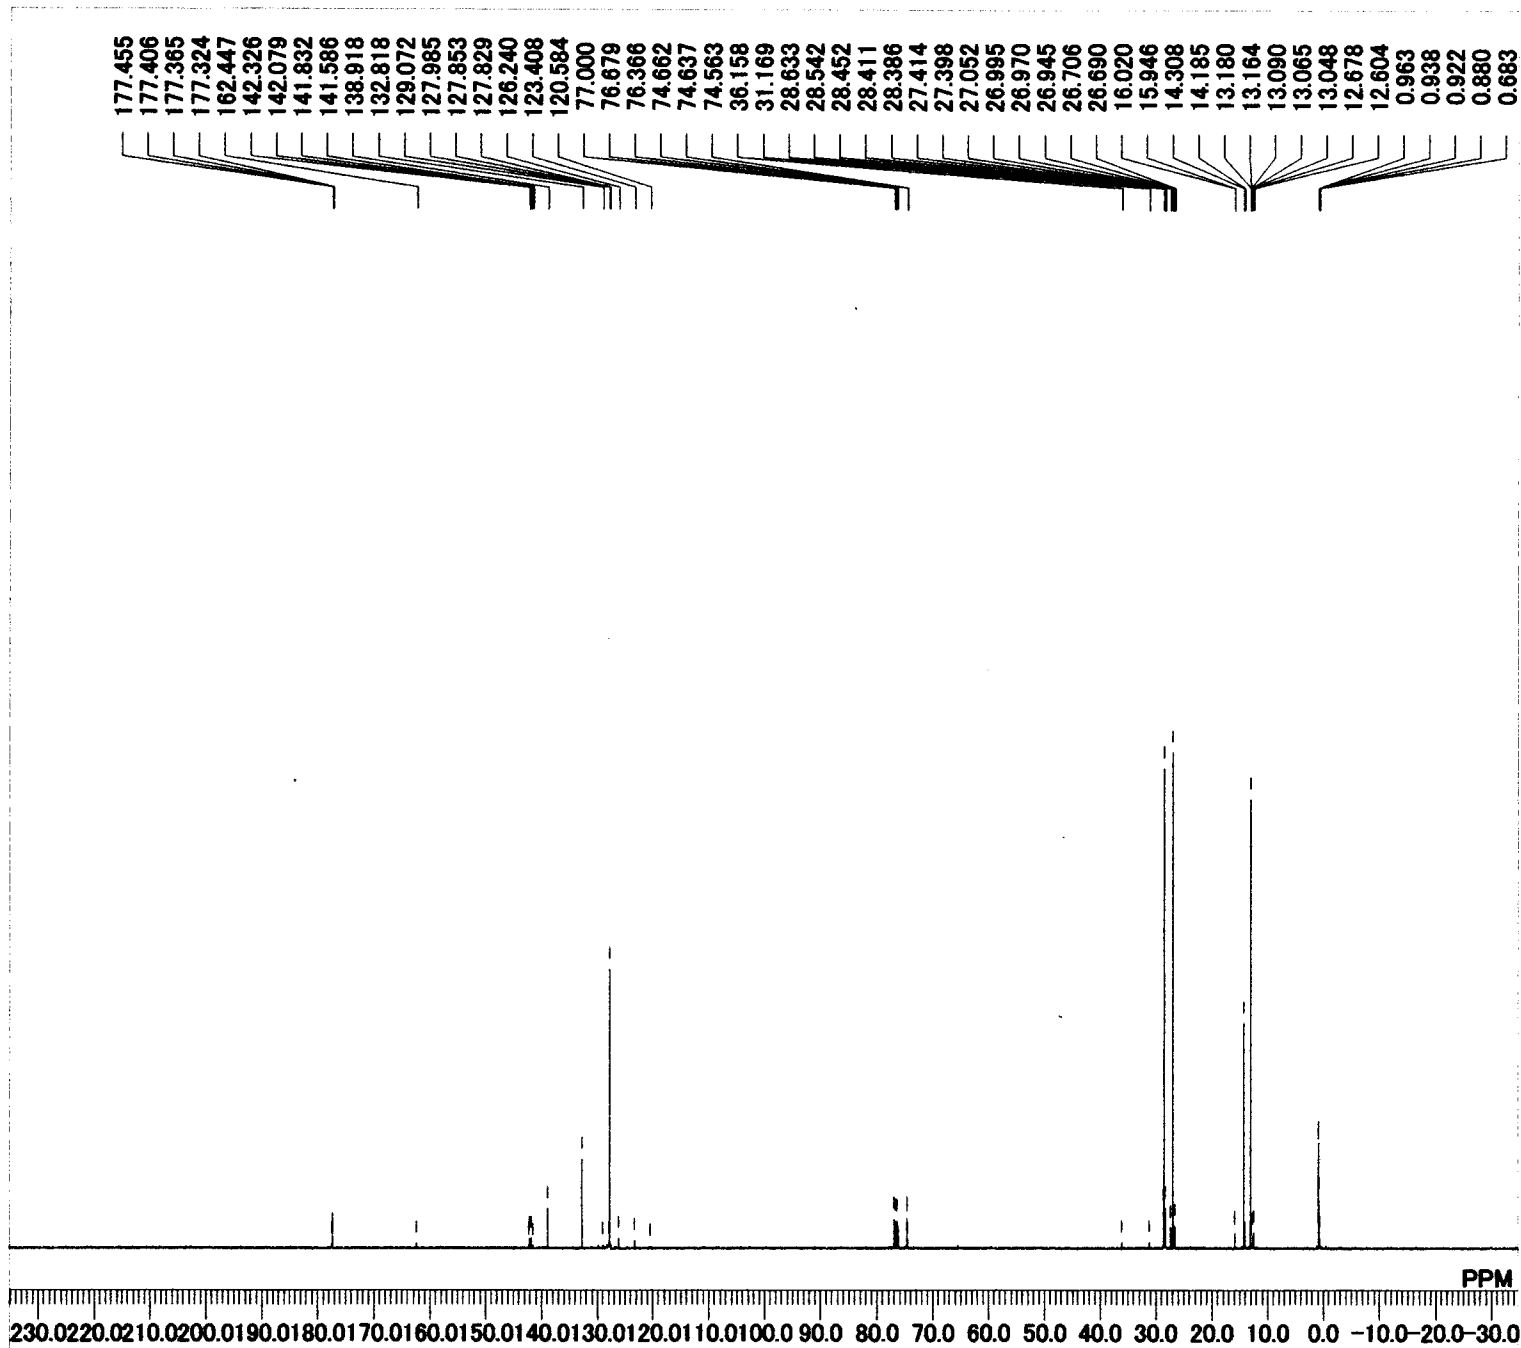

MENUF 13C  
OBNUC 13C  
OFR 100.40 MHz  
OBSET 125.00 KHz  
OBFIN 10500.00 Hz  
PW1 6.00 usec  
DEADT 19.10 usec  
PREDL 0.20000 msec  
IWT 1.0000 msec  
POINT 32768  
SPO 32768  
TIMES 256  
DUMMY 1  
FREQU 27118.64 Hz  
FLT 13550 Hz  
DELAY 14.80 usec  
ACQTM 1.2083 sec  
PD 1.7920 sec  
ADBIT 16  
RGAIN 23  
BF 0.10 Hz  
T1 0.00  
T2 0.00  
T3 90.00  
T4 100.00  
EXMOD BCM  
EXPCM Bilevel.complete.decoupling:Set\_IRRF  
IRNUC 1H  
IFR 399.65 MHz  
IRSET 124.00 KHz  
IRFIN 10500.00 Hz  
IRRPW 45 usec  
IRATN 511  
DFILE CF3-ph-p-Cl-OH-Si-Sn ue.als  
SF TH5ATFG20  
LKSET 61.60 KHz  
LKFIN 79.0 Hz  
LKLEV 180  
LGAIN 25  
LKPHS 231  
LKSIG 971  
CSPED 13 Hz  
FILDC  
FILDF

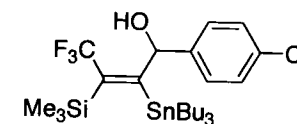



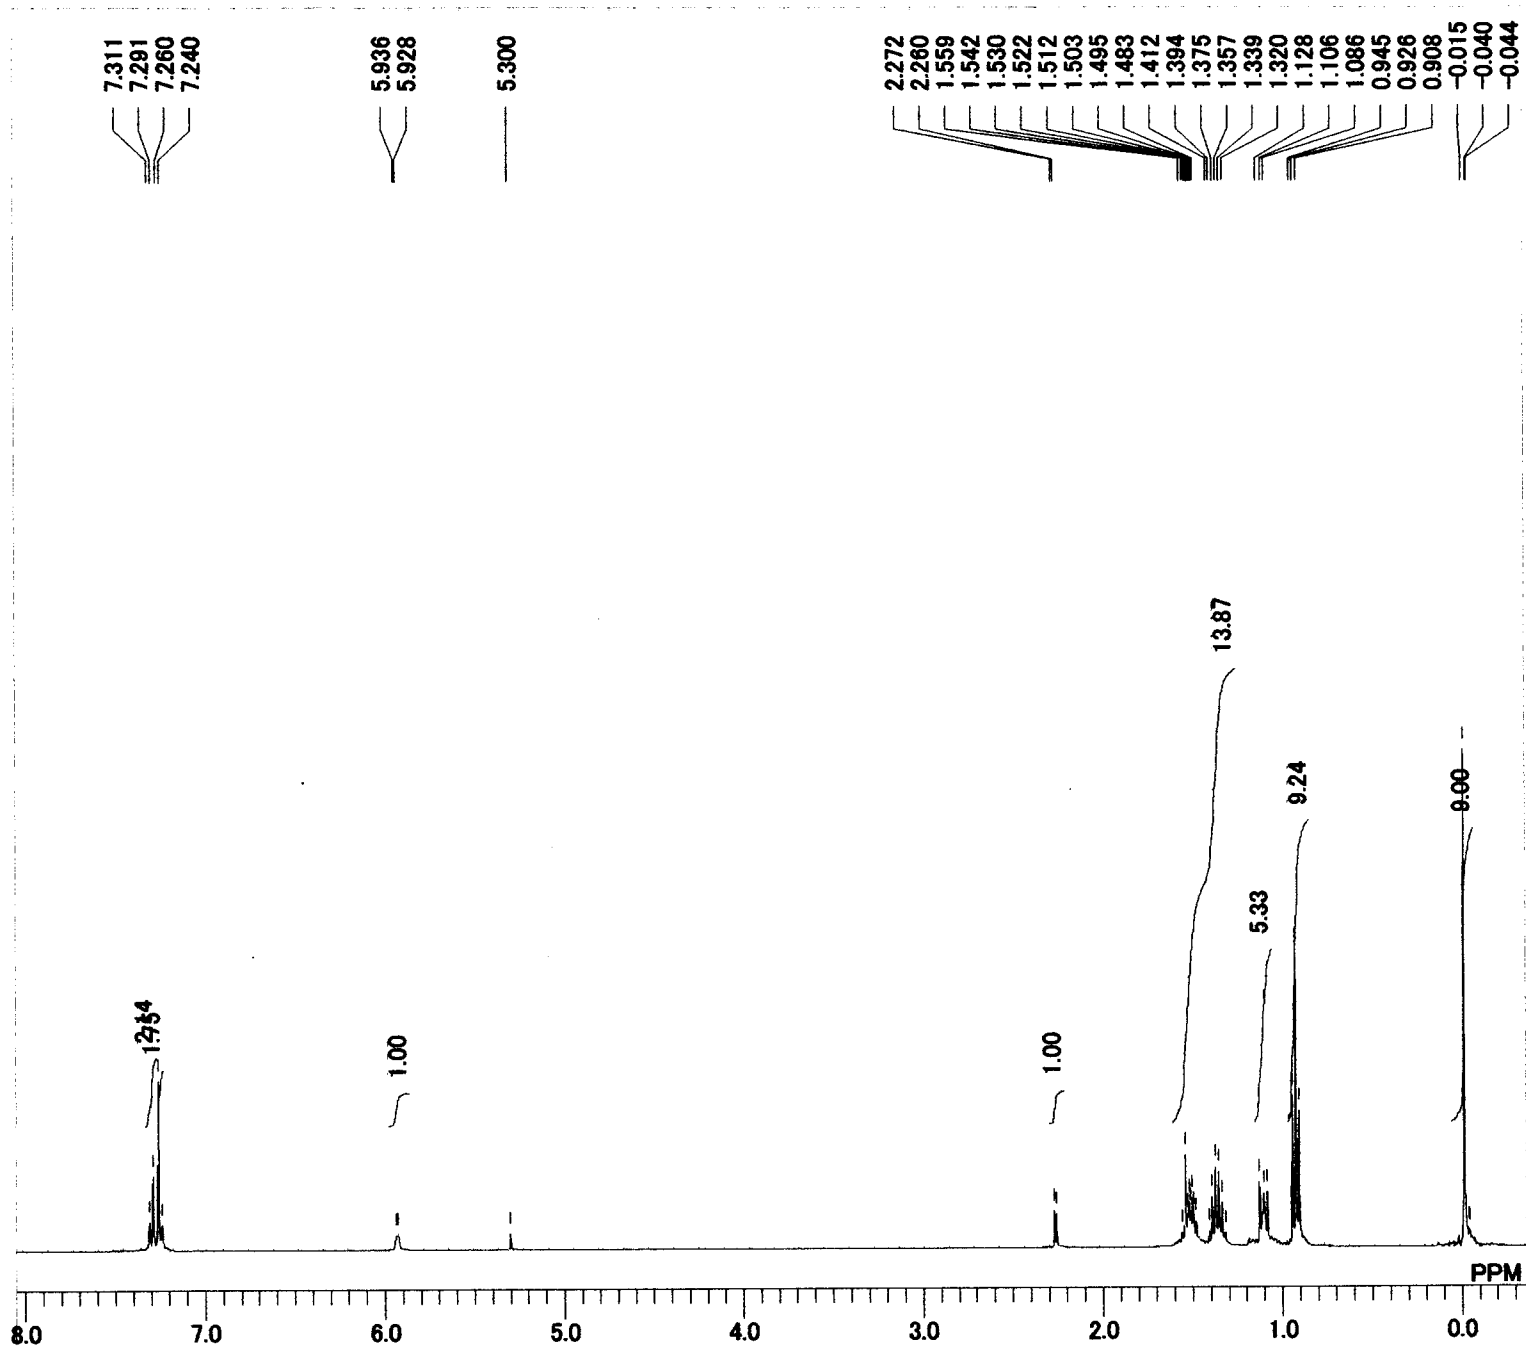

|       |                                 |
|-------|---------------------------------|
| MENUF | 1H                              |
| OBNUC | 1H                              |
| OFR   | 399.65 MHz                      |
| OBSET | 135.40 KHz                      |
| OBFIN | 24.90 Hz                        |
| PW1   | 5.80 usec                       |
| DEADT | 72.10 usec                      |
| PREDL | 0.20000 msec                    |
| IWT   | 1.0000 msec                     |
| POINT | 16384                           |
| SPO   | 16384                           |
| TIMES | 8                               |
| DUMMY | 1                               |
| FREQU | 7992.01 Hz                      |
| FLT   | 4000 Hz                         |
| DELAY | 50.00 usec                      |
| ACQTM | 2.0501 sec                      |
| PD    | 4.9500 sec                      |
| ADBIT | 16                              |
| RGAIN | 18                              |
| BF    | 0.60 Hz                         |
| T1    | 0.00                            |
| T2    | 0.00                            |
| T3    | 90.00                           |
| T4    | 100.00                          |
| EXMOD | NON                             |
| EXPCM | NON:Single.coupled:PW1_ACQTM_PT |
| IRNUC | 1H                              |
| IFR   | 399.65 MHz                      |
| IRSET | 136.90 KHz                      |
| IRFIN | 97.50 Hz                        |
| IRRPW | 45 usec                         |
| IRATN | 511                             |
| DFILE | Rxn.326 H shita.als             |
| SF    | TH5ATFG2                        |
| LKSET | 61.60 KHz                       |
| LKFIN | 79.0 Hz                         |
| LKLEV | 180                             |
| LGAIN | 27                              |
| LKPHS | 250                             |
| LKSIG | 3256                            |
| CSPED | 13 Hz                           |
| FILDC |                                 |
| FILDF |                                 |

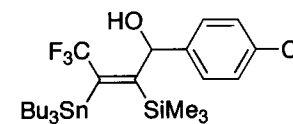

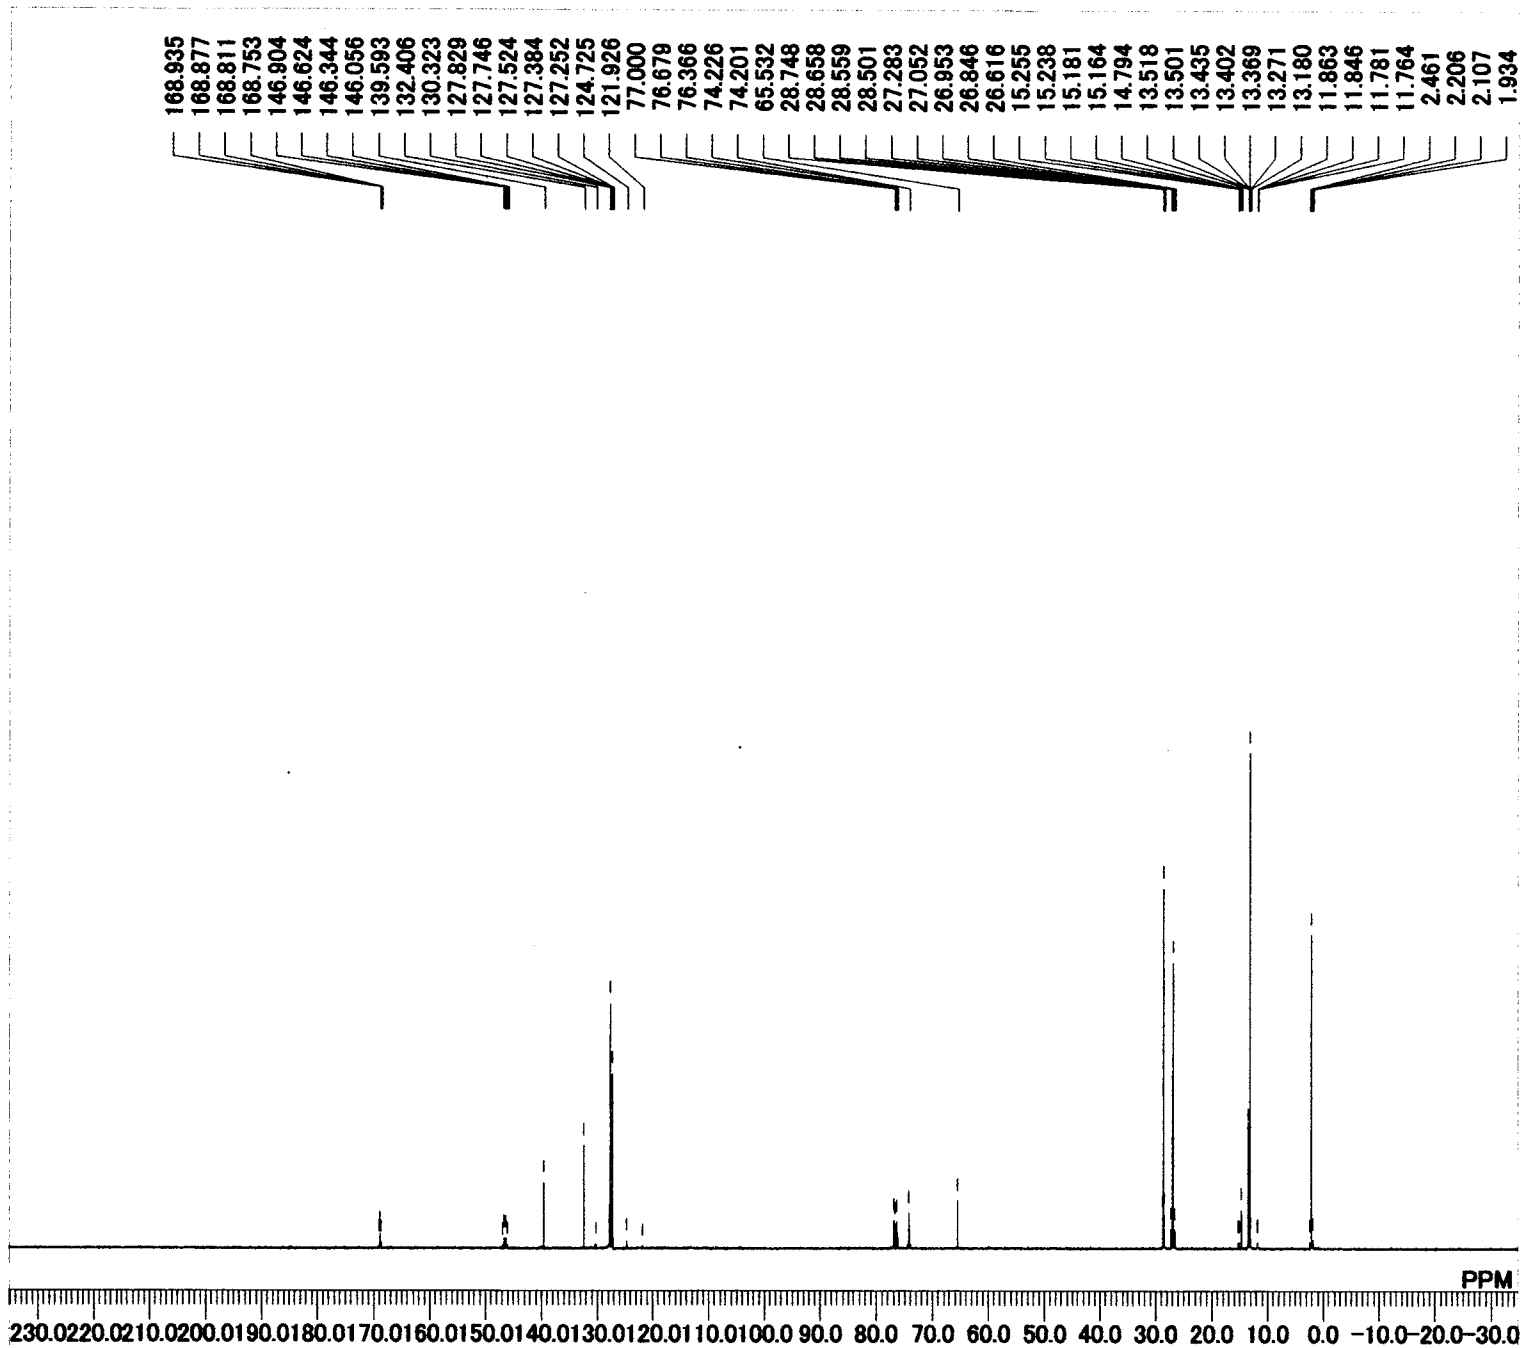

MENUF 13C  
OBNUC 13C  
OFR 100.40 MHz  
OBSET 125.00 KHz  
OBFIN 10500.00 Hz  
PW1 6.00 usec  
DEADT 19.10 usec  
PREDL 0.20000 msec  
IWT 1.0000 msec  
POINT 32768  
SPO 32768  
TIMES 256  
DUMMY 1  
FREQU 27118.64 Hz  
FLT 13550 Hz  
DELAY 14.80 usec  
ACQTM 1.2083 sec  
PD 1.7920 sec  
ADBIT 16  
RGAIN 22  
BF 0.10 Hz  
T1 0.00  
T2 0.00  
T3 90.00  
T4 100.00  
EXMOD BCM  
EXPCM Bilevel.complete.decoupling.Set\_IRRF  
IRNUC 1H  
IFR 399.65 MHz  
IRSET 124.00 KHz  
IRFIN 10500.00 Hz  
IRRPW 45 usec  
IRATN 511  
DFILE \_DEFAULT.ALS  
SF TH5ATFG20  
LKSET 61.60 KHz  
LKFIN 79.0 Hz  
LKLEV 180  
LGAIN 24  
LKPHS 231  
LKSIG 605  
CSPED 10 Hz  
FILDC  
FILDF

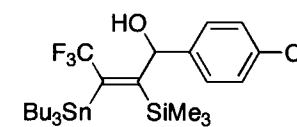

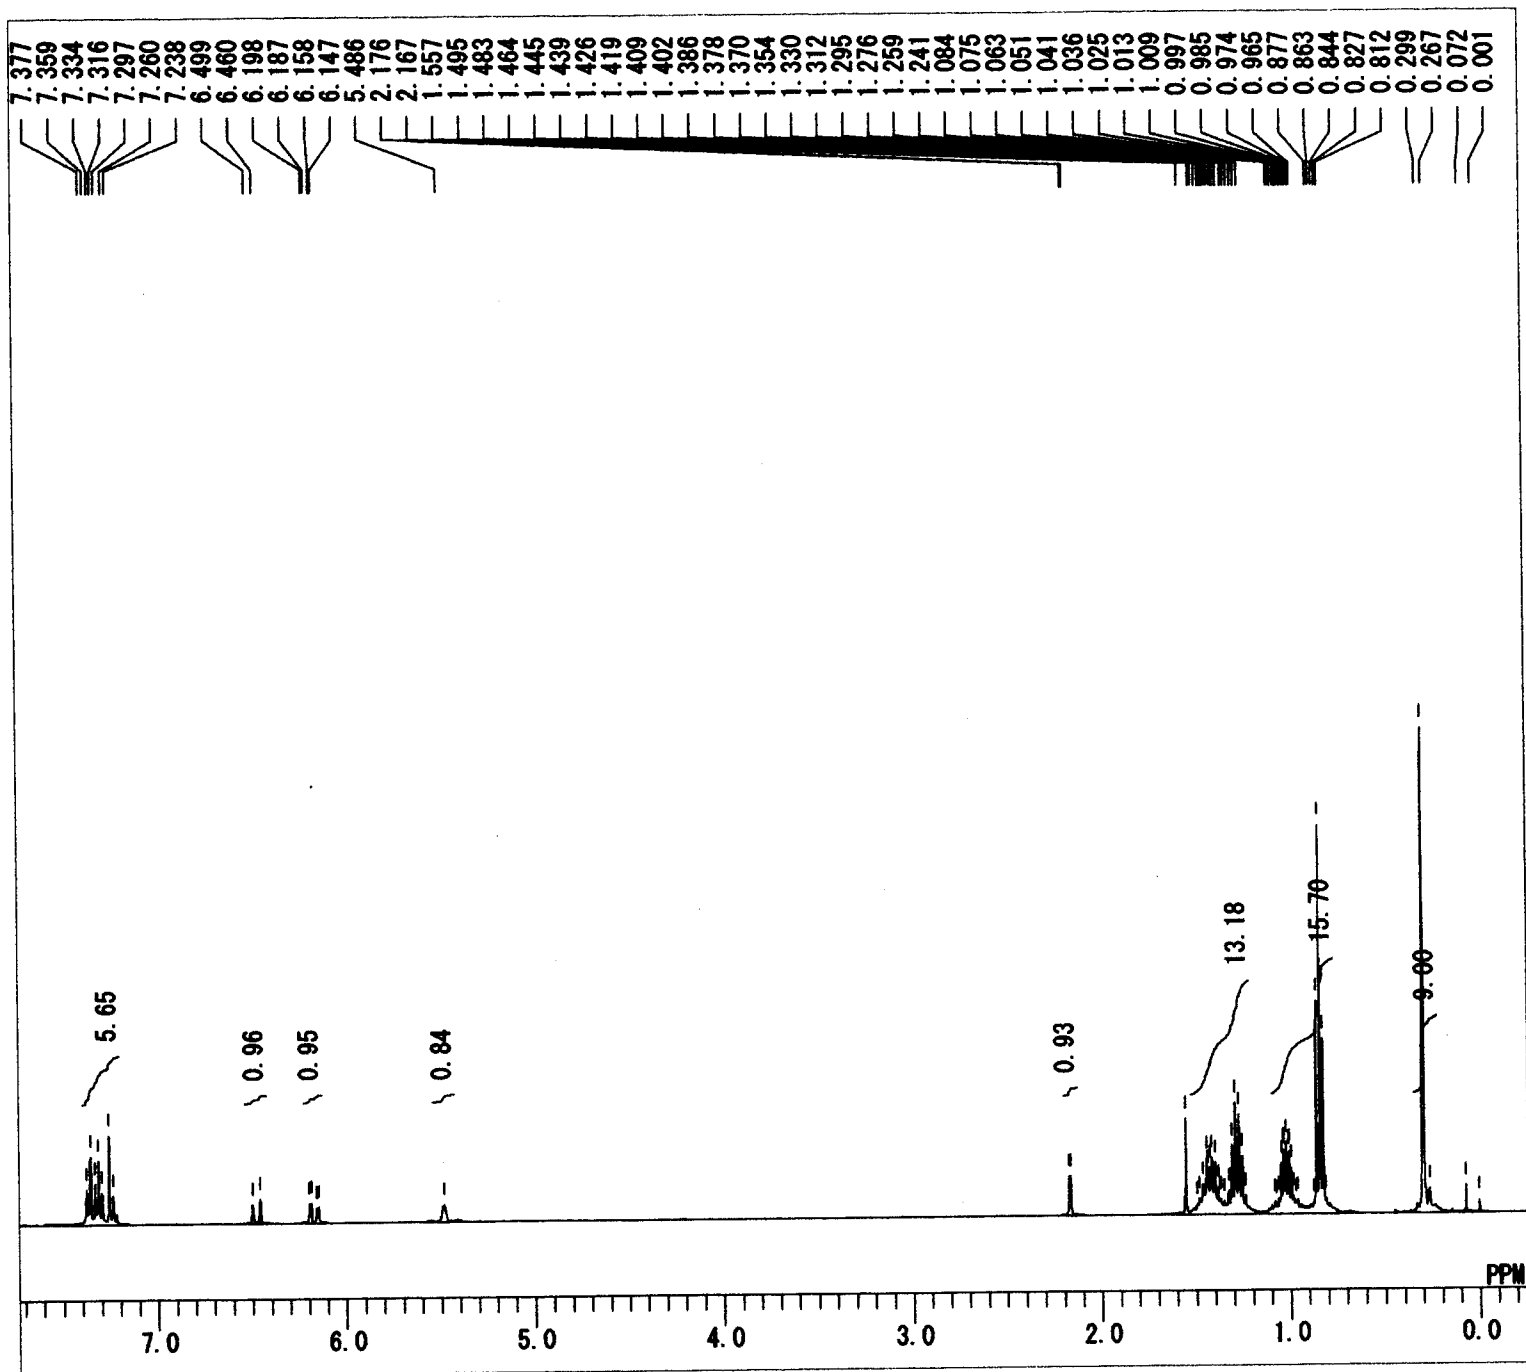

MENUF 1H  
 OBNUC 1H  
 OFR 399.65 MHz  
 OBSET 135.40 KHz  
 OBFIN 24.90 Hz  
 PW1 5.80 usec  
 DEADT 72.10 usec  
 PREDL 0.20000 msec  
 IWT 1.0000 msec  
 POINT 16384  
 SPO 16384  
 TIMES 8  
 DUMMY 1  
 FREQU 7992.01 Hz  
 FLT 4000 Hz  
 DELAY 50.00 usec  
 ACQTM 2.0501 sec  
 PD 4.9500 sec  
 ADBIT 16  
 RGAIN 15  
 BF 0.10 Hz  
 T1 0.00  
 T2 0.00  
 T3 90.00  
 T4 100.00  
 EXMOD NON  
 EXPCM NON: Single. coupled: PW1\_ACQTM  
 IRNUC 1H  
 IFR 399.65 MHz  
 IRSET 136.90 KHz  
 IRFIN 97.50 Hz  
 IRRPW 45 usec  
 IRATN 511  
 DFILE Rrxn. 335 H ue. als  
 SF TH5ATFG2  
 LKSET 61.60 KHz  
 LKFIN 79.0 Hz  
 LKLEV 180  
 LGAIN 24  
 LKPHS 250  
 LKSIG 1280  
 CSPED 14 Hz  
 FILDC  
 FILDF

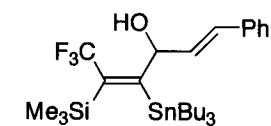

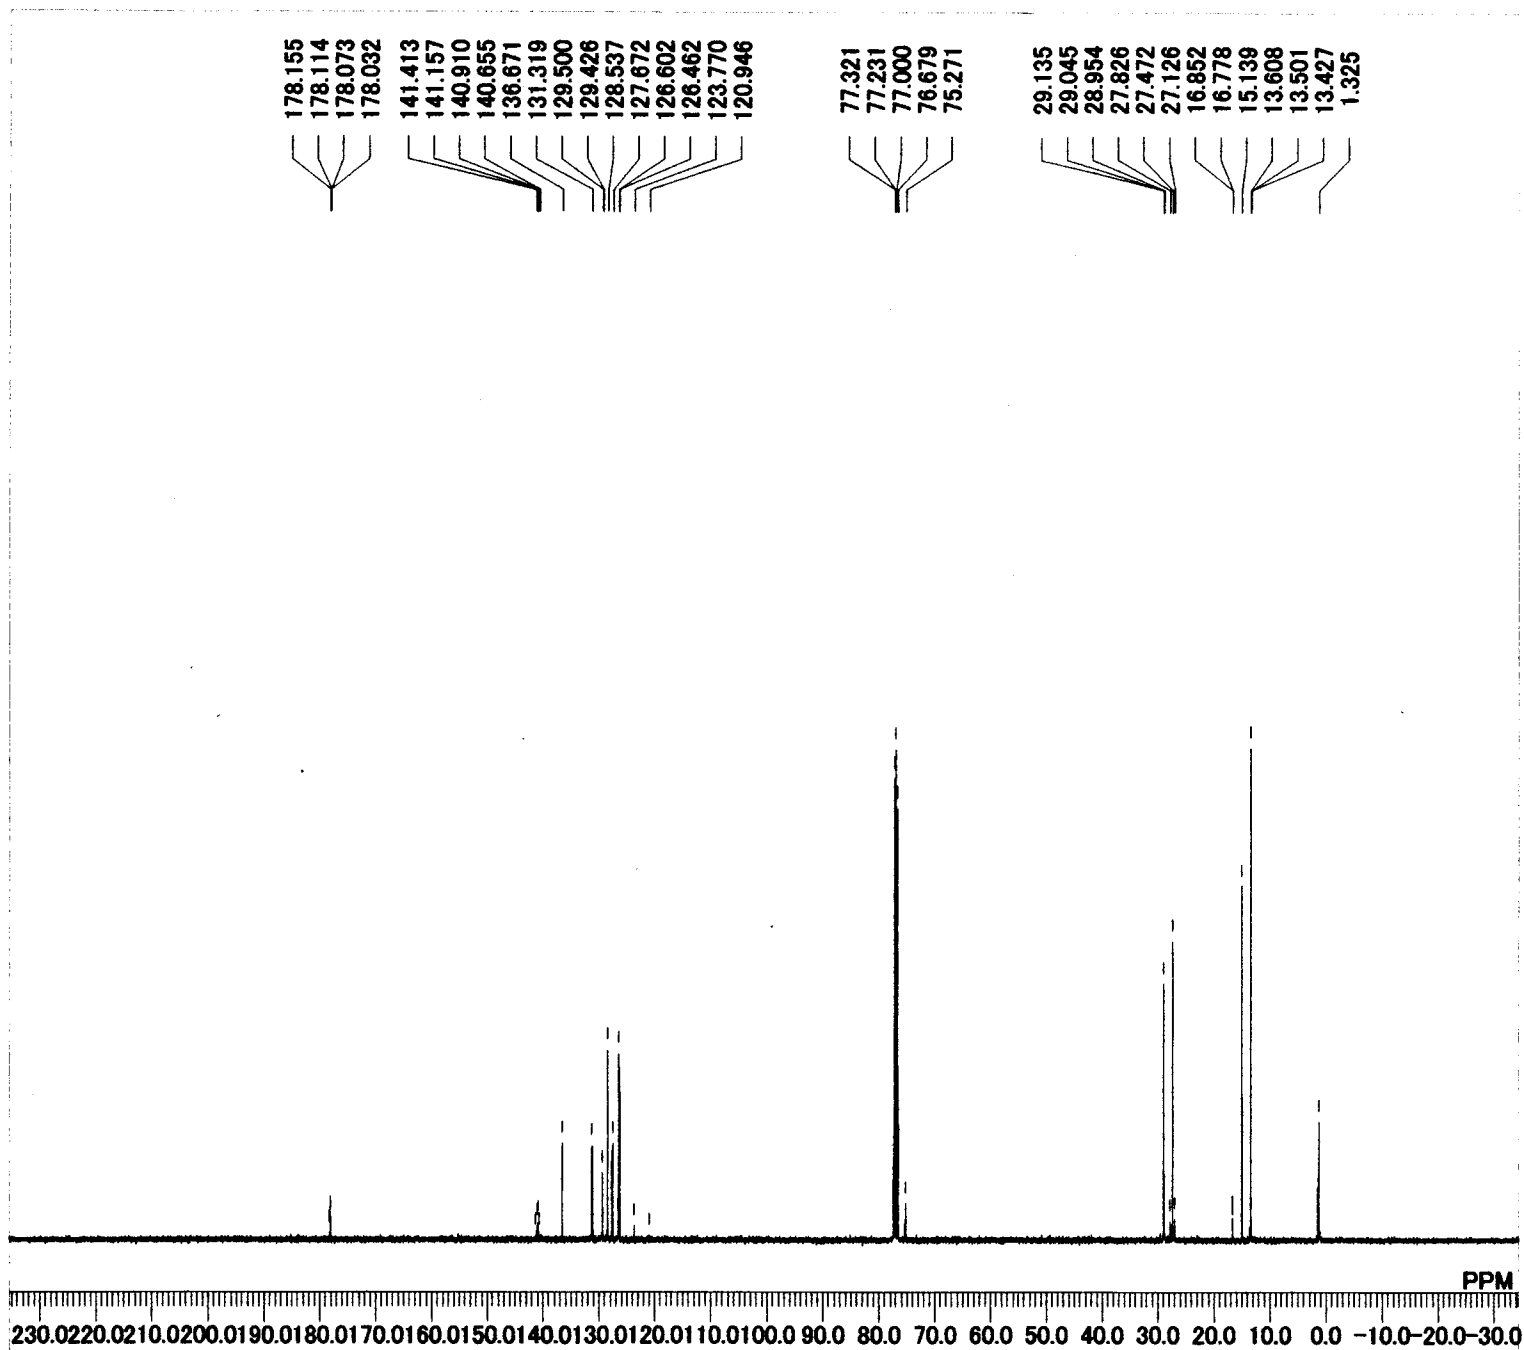

MENUF 13C  
 OBNUC 13C  
 OFR 100.40 MHz  
 OBSET 125.00 KHz  
 OBFIN 10500.00 Hz  
 PW1 6.20 usec  
 DEADT 19.00 usec  
 PREDL 0.20000 msec  
 IWT 1.0000 msec  
 POINT 32768  
 SPO 32768  
 TIMES 100000  
 DUMMY 1  
 FREQU 27118.64 Hz  
 FLT 13550 Hz  
 DELAY 14.80 usec  
 ACQTM 1.2083 sec  
 PD 1.7920 sec  
 ADBIT 16  
 RGAIN 25  
 BF 0.10 Hz  
 T1 0.00  
 T2 0.00  
 T3 90.00  
 T4 100.00  
 EXMOD BCM  
 EXPCM Bilevel.complete.decoupling.Set\_IRRF  
 IRNUC 1H  
 IFR 399.65 MHz  
 IRSET 124.00 KHz  
 IRFIN 10500.00 Hz  
 IRRPW 45 usec  
 IRATN 511  
 DFILE CF3-ph-CH2CHPh-OH-Si-Sn uerR  
 SF TH5ATFG2  
 LKSET 61.60 KHz  
 LKFIN 79.0 Hz  
 LKLEV 180  
 LGAIN 24  
 LKPHS 150  
 LKSIG 466  
 CSPED 10 Hz  
 FILDC  
 FILDF

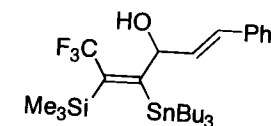

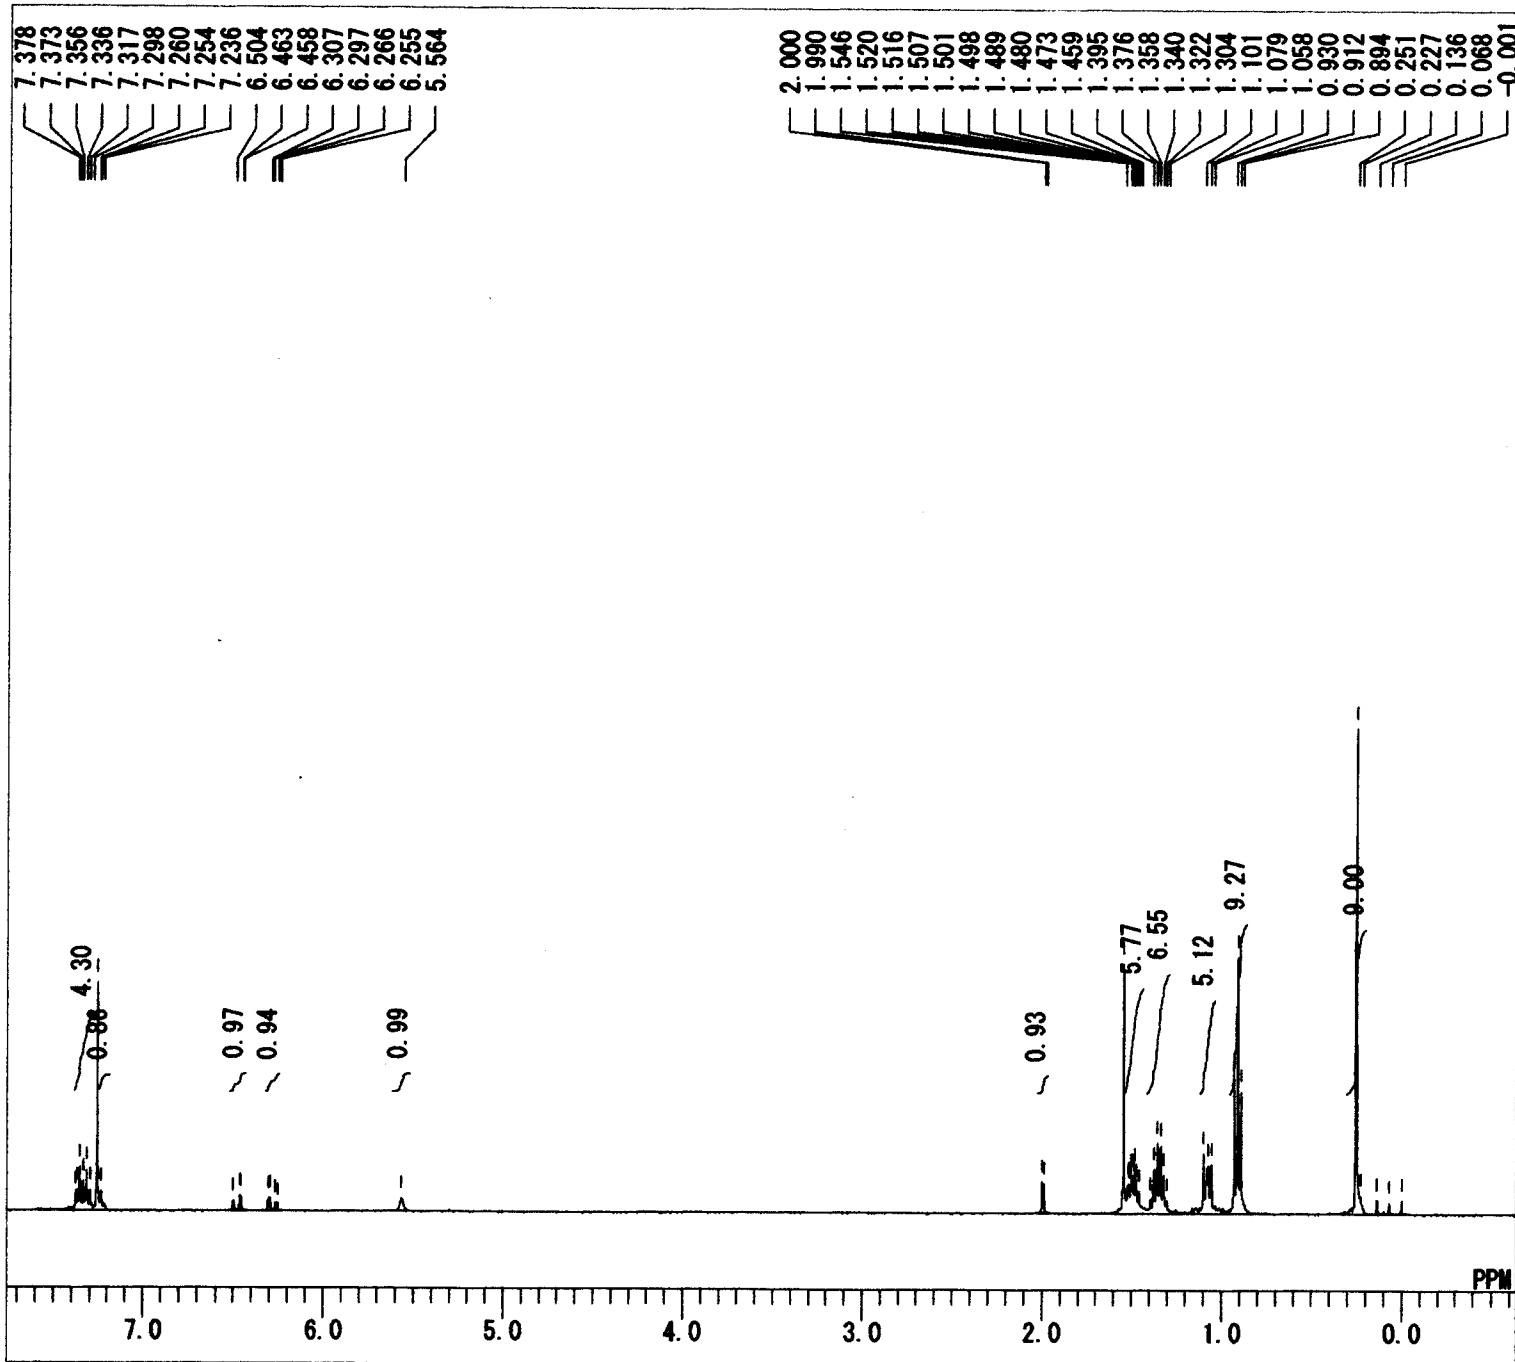

```

MENUF 1H
OBNUC 1H
OFR 399.65 MHz
OBSET 135.40 KHz
OBFIN 24.90 Hz
PW1 5.80 usec
DEADT 72.10 usec
PREDL 0.20000 msec
IWT 1.0000 msec
POINT 16384
SPO 16384
TIMES 8
DUMMY 1
FREQU 7992.01 Hz
FLT 4000 Hz
DELAY 50.00 usec
ACQTM 2.0501 sec
PD 4.9500 sec
ADBIT 16
RGAIN 19
BF 0.10 Hz
T1 0.00
T2 0.00
T3 90.00
T4 100.00
EXMOD NON
EXPCM NON:Single.coupled:PW1_ACQTM
IRNUC 1H
IFR 399.65 MHz
IRSET 136.90 KHz
IRFIN 97.50 Hz
IRRPW 45 usec
IRATN 511
DFILE DEFAULT.ALS
SF TH5ATFG2
LKSET 61.60 KHz
LKFIN 79.0 Hz
LKLEV 180
LGAIN 24
LKPHS 250
LKSIG 1299
CSPED 11 Hz
FILDC
FILDF
    
```

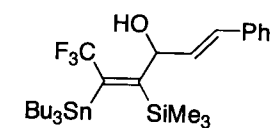

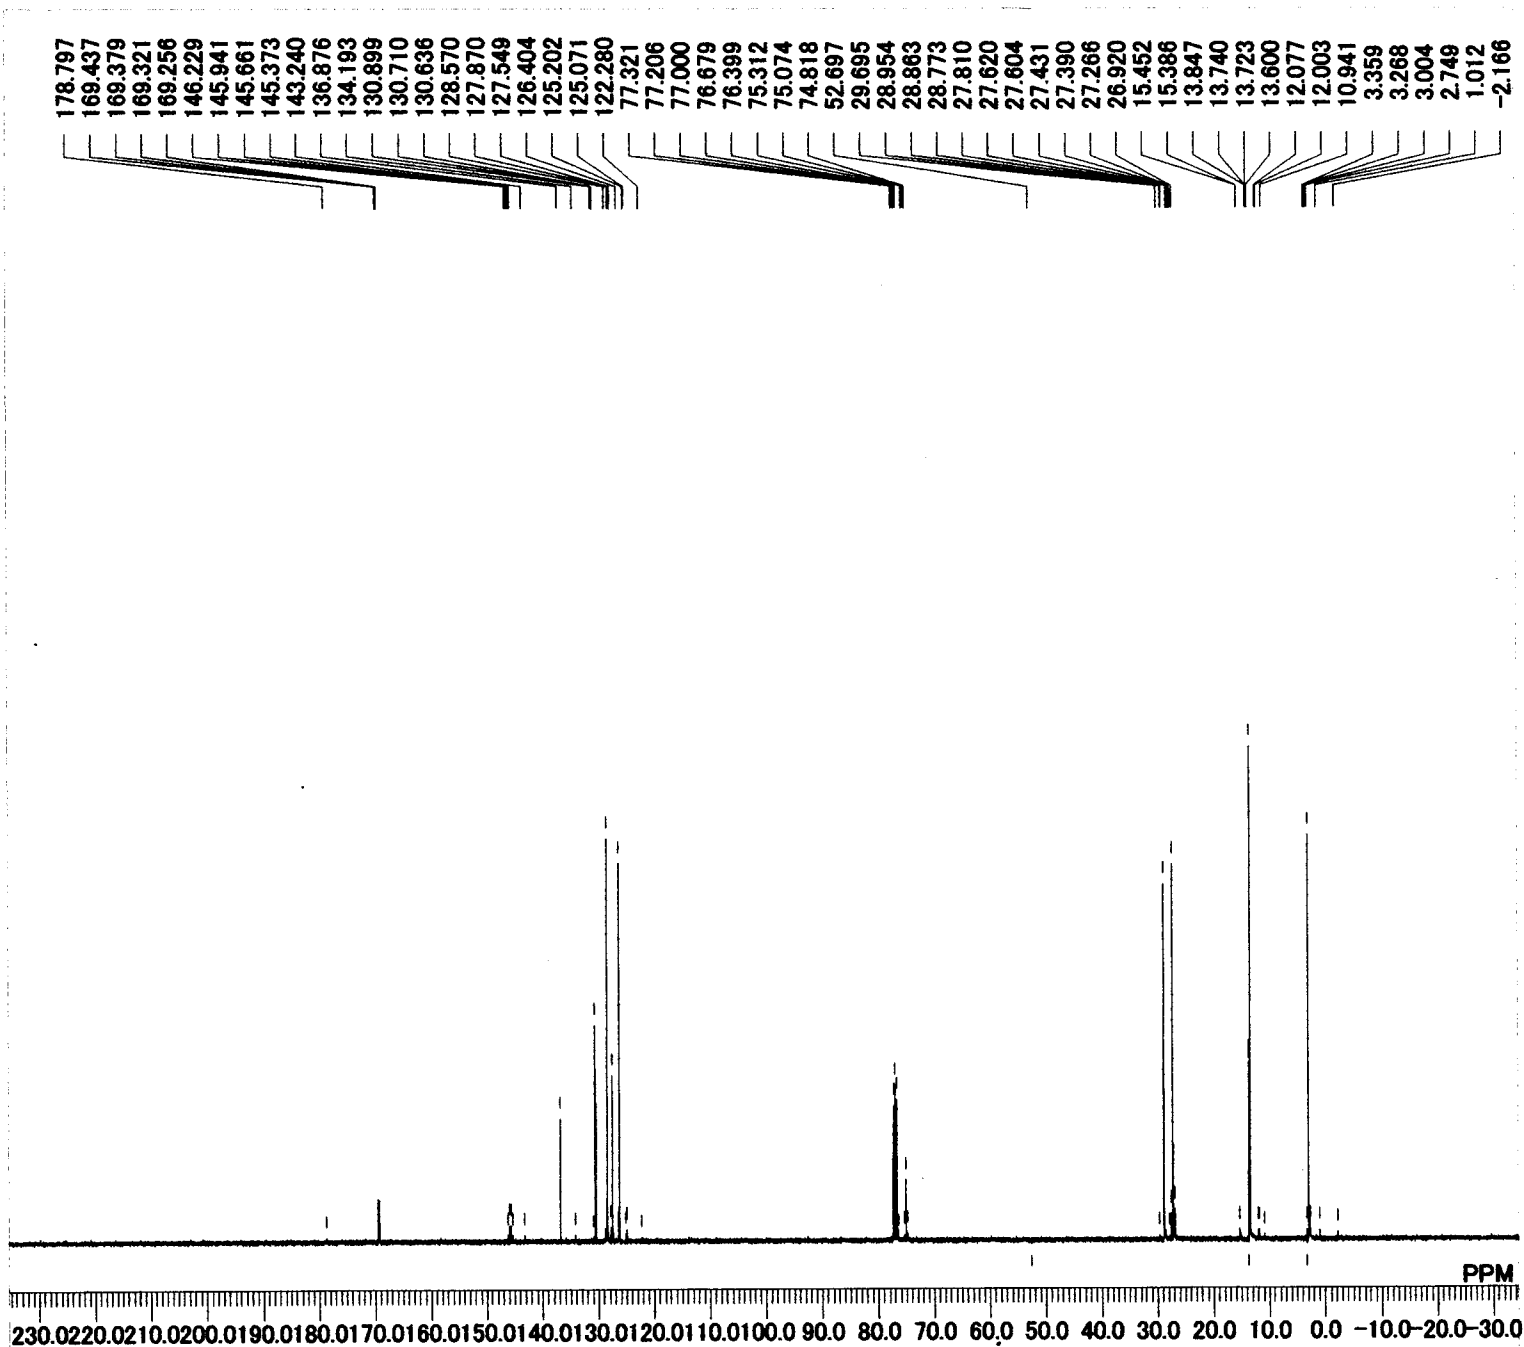

MENUF 13C  
OBNUC 13C  
OFR 100.40 MHz  
OBSET 125.00 KHz  
OBFIN 10500.00 Hz  
PW1 6.20 usec  
DEADT 19.00 usec  
PREDL 0.20000 msec  
IWT 1.0000 msec  
POINT 32768  
SPO 32768  
TIMES 250000  
DUMMY 1  
FREQU 27118.64 Hz  
FLT 13550 Hz  
DELAY 14.80 usec  
ACQTM 1.2083 sec  
PD 1.7920 sec  
ADBIT 16  
RGAIN 24  
BF 0.00 Hz  
T1 0.00  
T2 0.00  
T3 90.00  
T4 100.00  
EXMOD BCM  
EXPCM Bilevel.complete.decoupling.Set\_IRRF  
IRNUC 1H  
IFR 399.65 MHz  
IRSET 124.00 KHz  
IRFIN 10500.00 Hz  
IRRPW 45 usec  
IRATN 511  
DFILE \_DEFAULT.ALS  
SF TH5ATFG2  
LKSET 61.60 KHz  
LKFIN 79.0 Hz  
LKLEV 180  
LGAIN 27  
LKPHS 150  
LKSIG 937  
CSPED 12 Hz  
FILDC  
FILDF

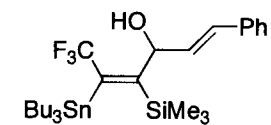

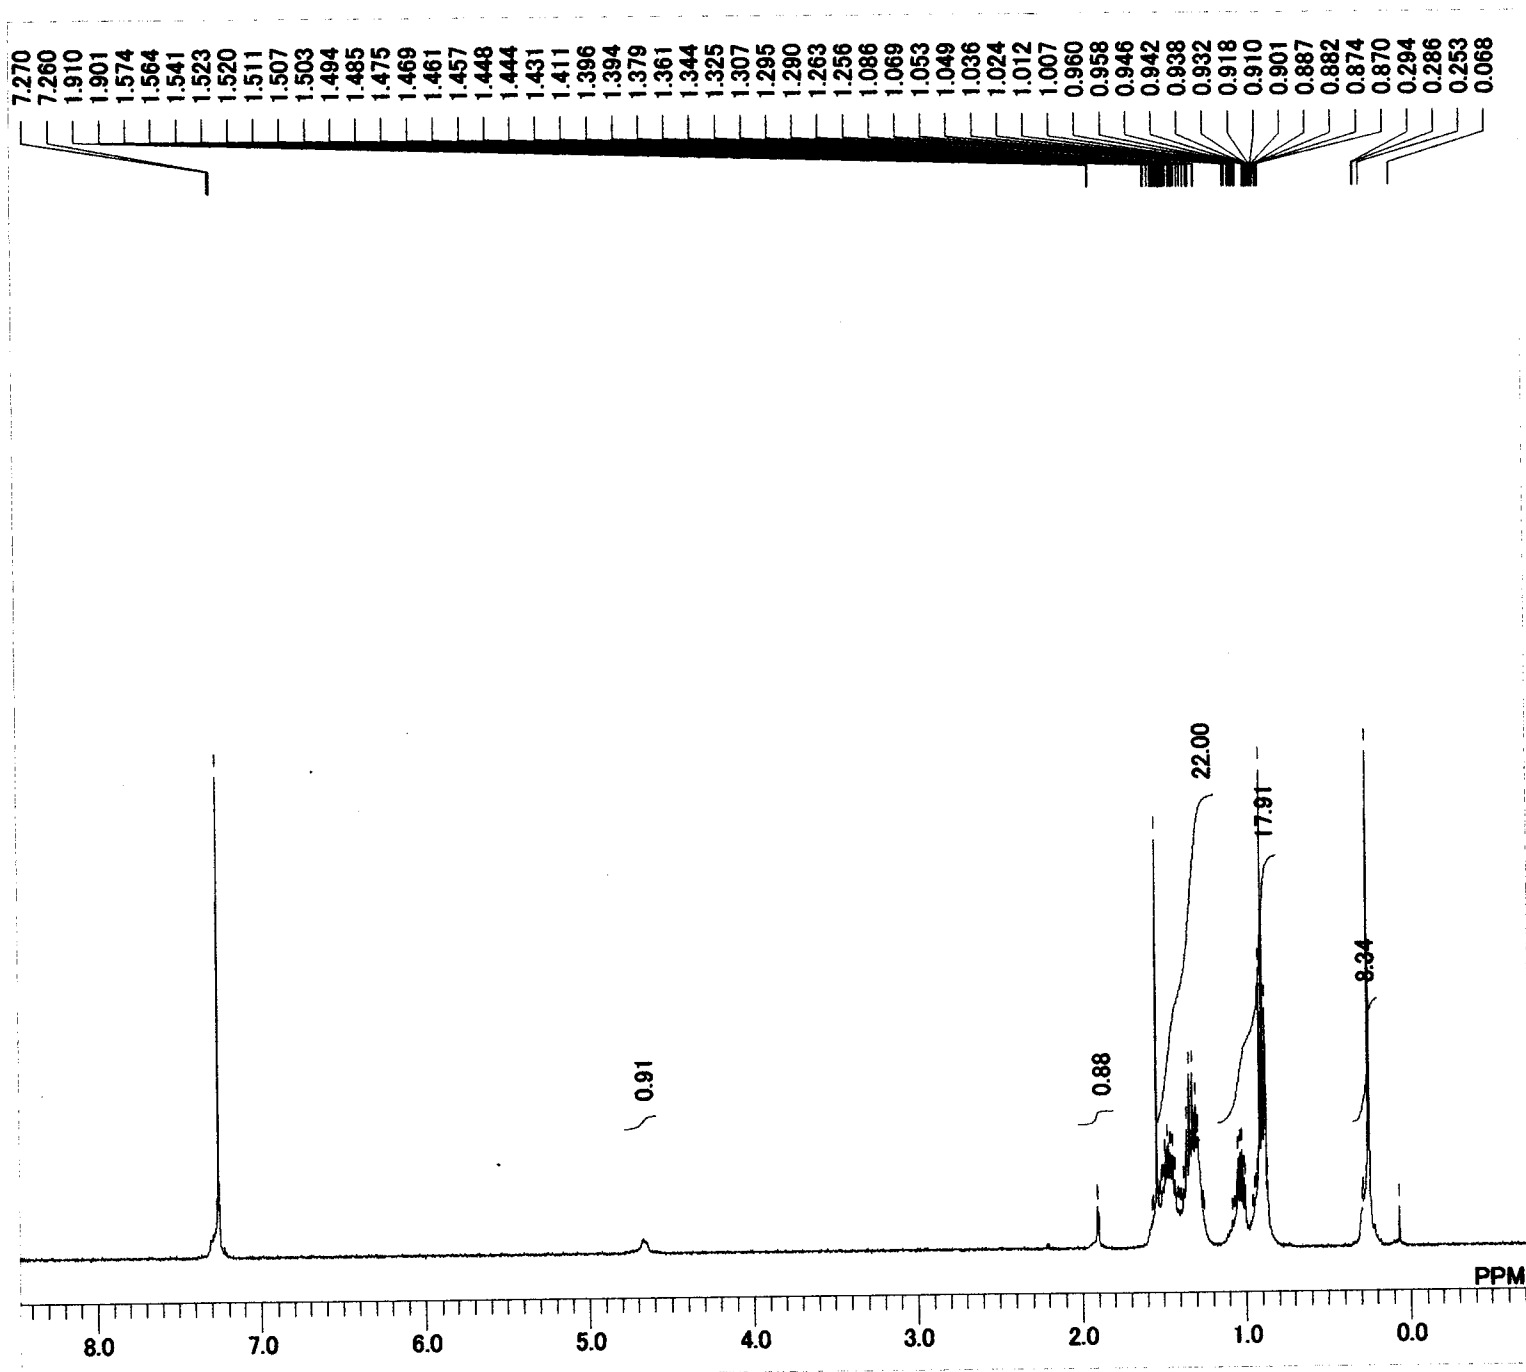

|       |                                 |
|-------|---------------------------------|
| MENUF | 1H                              |
| OBNUC | 1H                              |
| OFR   | 399.65 MHz                      |
| OBSET | 135.40 KHz                      |
| OBFIN | 24.90 Hz                        |
| PW1   | 5.80 usec                       |
| DEADT | 72.10 usec                      |
| PREDL | 0.20000 msec                    |
| IWT   | 1.0000 msec                     |
| POINT | 16384                           |
| SPO   | 16384                           |
| TIMES | 8                               |
| DUMMY | 1                               |
| FREQU | 7992.01 Hz                      |
| FLT   | 4000 Hz                         |
| DELAY | 50.00 usec                      |
| ACQTM | 2.0501 sec                      |
| PD    | 4.9500 sec                      |
| ADBIT | 16                              |
| RGAIN | 19                              |
| BF    | 0.10 Hz                         |
| T1    | 0.00                            |
| T2    | 0.00                            |
| T3    | 90.00                           |
| T4    | 100.00                          |
| EXMOD | NON                             |
| EXPCM | NON:Single.coupled:PW1_ACQTM_PC |
| IRNUC | 1H                              |
| IFR   | 399.65 MHz                      |
| IRSET | 136.90 KHz                      |
| IRFIN | 97.50 Hz                        |
| IRRPW | 45 usec                         |
| IRATN | 511                             |
| DFILE | Rxn.363 ①H.als                  |
| SF    | TH5ATFG2                        |
| LKSET | 61.60 KHz                       |
| LKFIN | 79.0 Hz                         |
| LKLEV | 180                             |
| LGAIN | 24                              |
| LKPHS | 238                             |
| LKSIG | 807                             |
| CSPED | 13 Hz                           |
| FILDC |                                 |
| FILDF |                                 |

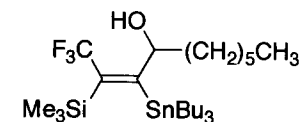

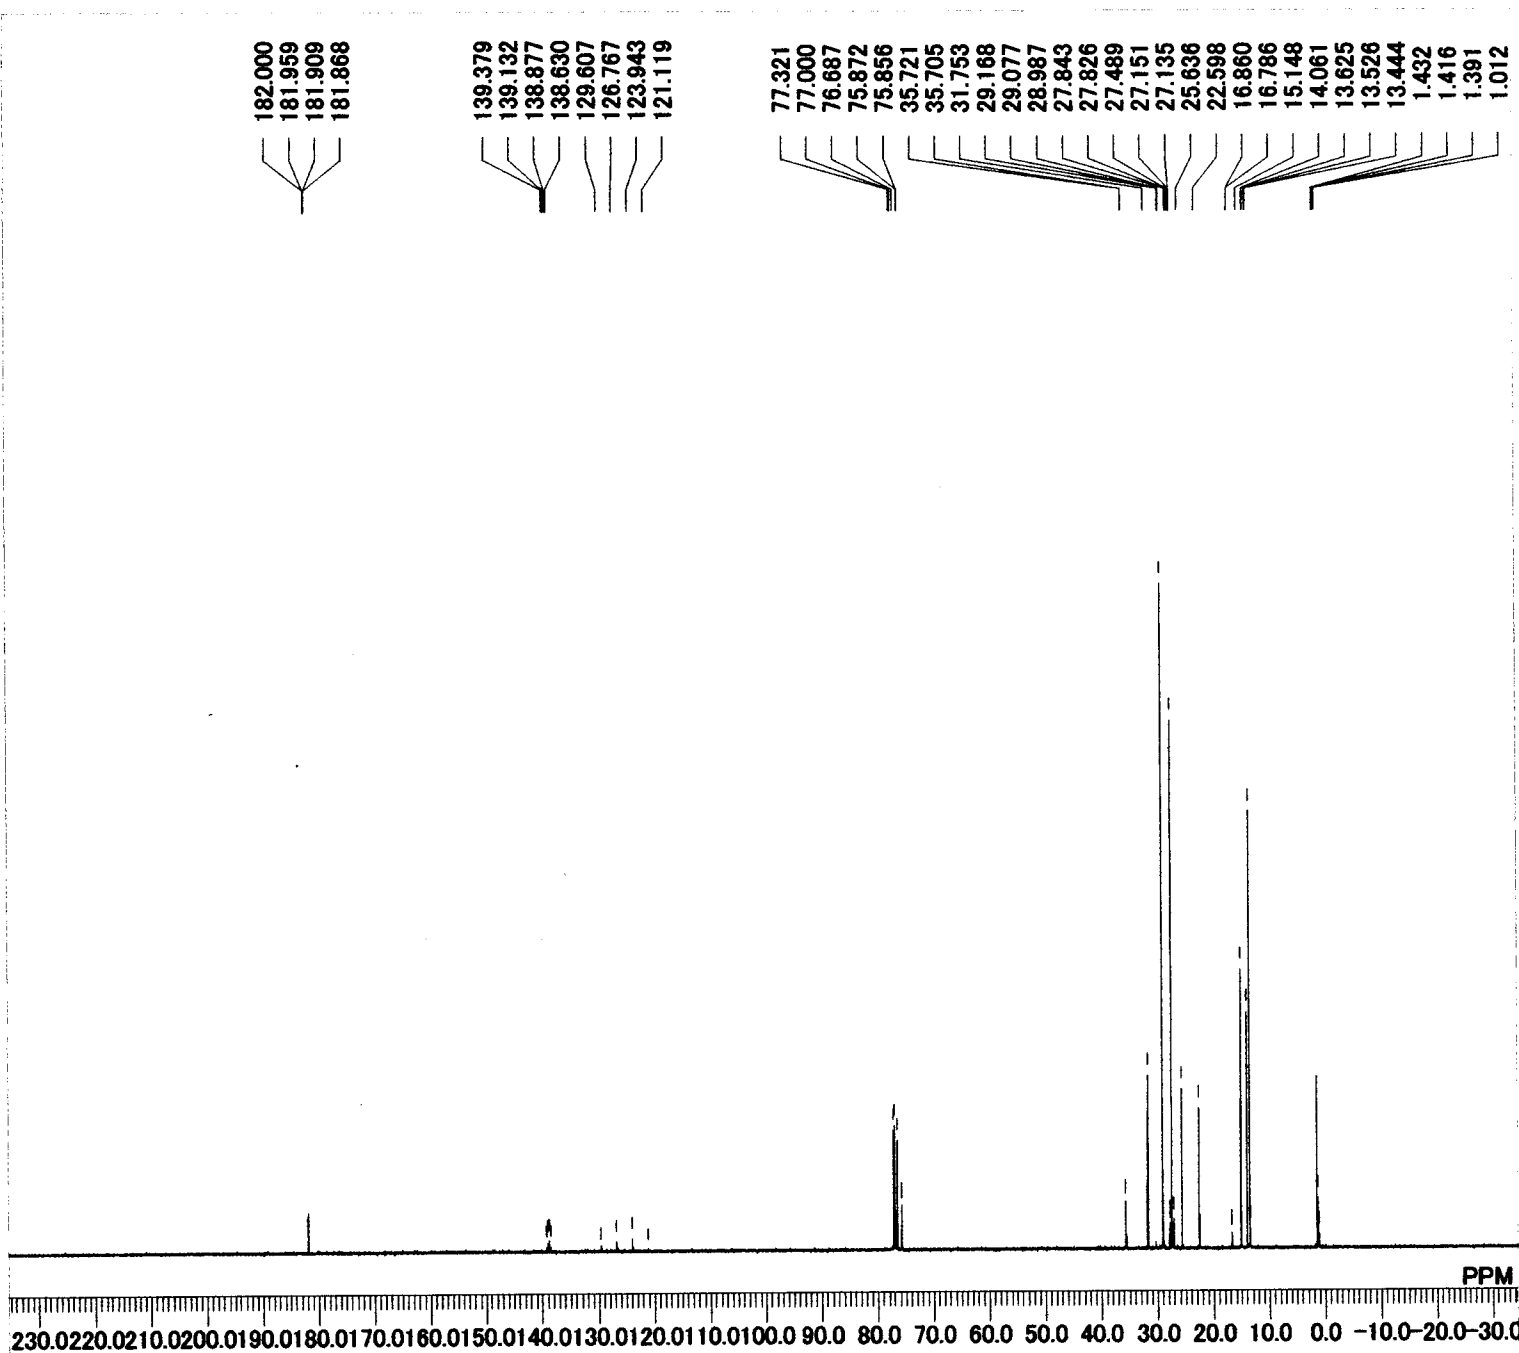

|       |                                      |
|-------|--------------------------------------|
| MENUF | 13C                                  |
| OBNUC | 13C                                  |
| OFR   | 100.40 MHz                           |
| OBSET | 125.00 KHz                           |
| OBFIN | 10500.00 Hz                          |
| PW1   | 6.00 usec                            |
| DEADT | 19.10 usec                           |
| PREDL | 0.20000 msec                         |
| IWT   | 1.0000 msec                          |
| POINT | 32768                                |
| SPO   | 32768                                |
| TIMES | 2000                                 |
| DUMMY | 1                                    |
| FREQU | 27118.64 Hz                          |
| FLT   | 13550 Hz                             |
| DELAY | 14.80 usec                           |
| ACQTM | 1.2083 sec                           |
| PD    | 1.7920 sec                           |
| ADBIT | 16                                   |
| RGAIN | 25                                   |
| BF    | 0.10 Hz                              |
| T1    | 0.00                                 |
| T2    | 0.00                                 |
| T3    | 90.00                                |
| T4    | 100.00                               |
| EXMOD | BCM                                  |
| EXPCM | Bilevel.complete.decoupling:Set_IRRF |
| IRNUC | 1H                                   |
| IFR   | 399.65 MHz                           |
| IRSET | 124.00 KHz                           |
| IRFIN | 10500.00 Hz                          |
| IRRPW | 45 usec                              |
| IRATN | 511                                  |
| DFILE | CF3-OH-C2H5CH3-Sn-Si (13C) uel       |
| SF    | TH5ATFG2                             |
| LKSET | 61.60 KHz                            |
| LKFIN | 79.0 Hz                              |
| LKLEV | 180                                  |
| LGAIN | 24                                   |
| LKPHS | 238                                  |
| LKSIG | 1226                                 |
| CSPED | 10 Hz                                |
| FILDC |                                      |
| FILDF |                                      |

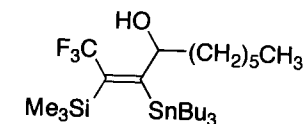



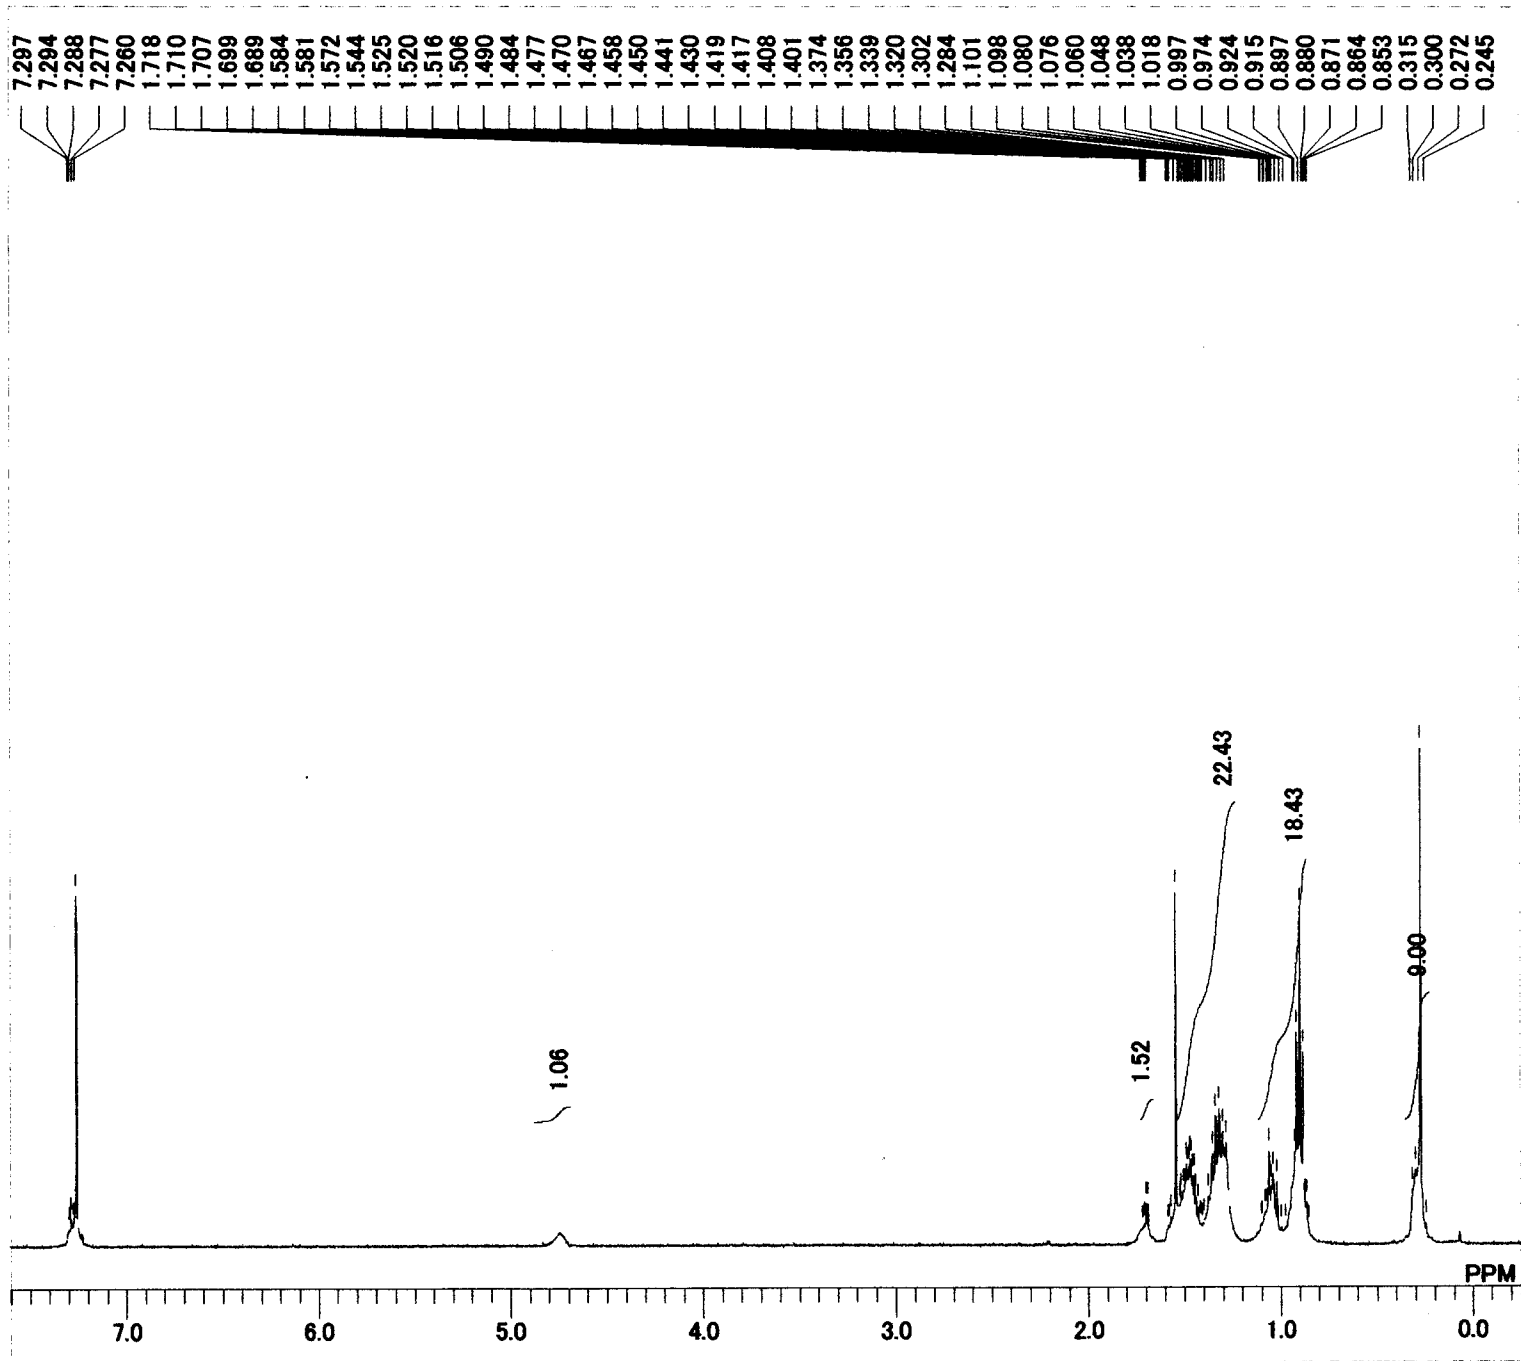

MENUF  
 OBNUC  
 OFR  
 OBSET  
 OBFIN  
 PW1  
 DEADT  
 PREDL  
 IWT  
 POINT  
 SPO  
 TIMES  
 DUMMY  
 FREQU  
 FLT  
 DELAY  
 ACQTM  
 PD  
 ADBIT  
 RGAIN  
 BF  
 T1  
 T2  
 T3  
 T4  
 EXMOD  
 EXPCM  
 IRNUC  
 IFR  
 IRSET  
 IRFIN  
 IRRPW  
 IRATN  
 DFILE  
 SF  
 LKSET  
 LKFIN  
 LKLEV  
 LGAIN  
 LKPHS  
 LKSIG  
 CSPED  
 FILDC  
 FILDF

1H  
 1H  
 399.65 MHz  
 135.40 KHz  
 24.90 Hz  
 5.80 usec  
 72.10 usec  
 0.20000 msec  
 1.0000 msec  
 16384  
 16384  
 8  
 1  
 7992.01 Hz  
 4000 Hz  
 50.00 usec  
 2.0501 sec  
 4.9500 sec  
 16  
 19  
 0.10 Hz  
 0.00  
 0.00  
 90.00  
 100.00  
 NON  
 NON:Single.coupled:PW1\_ACQTM\_PC  
 1H  
 399.65 MHz  
 136.90 KHz  
 97.50 Hz  
 45 usec  
 511  
 Rxn.363 1H.als  
 TH5ATFG2  
 61.60 KHz  
 79.0 Hz  
 180  
 23  
 238  
 640  
 11 Hz

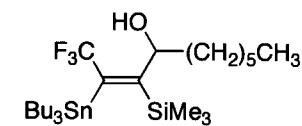

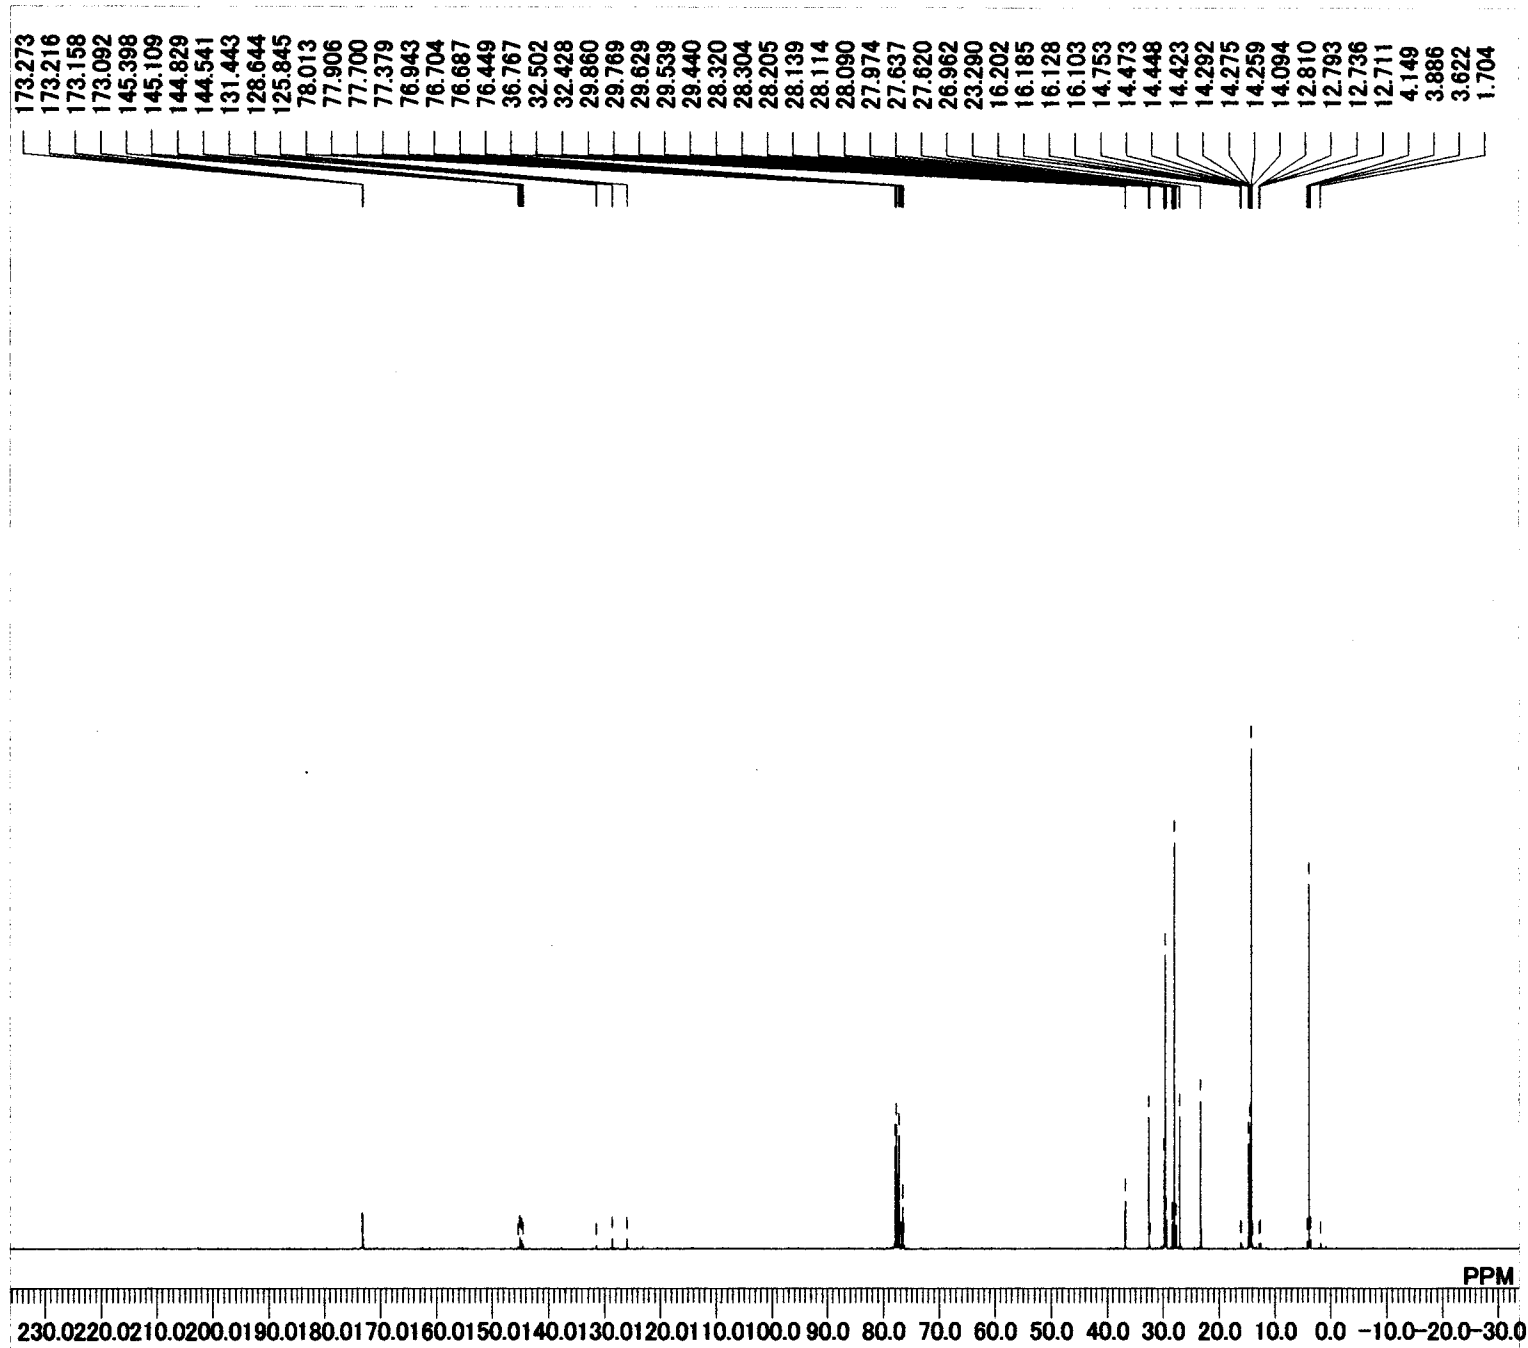

MENUF 13C  
OBNUC 13C  
OFR 100.40 MHz  
OBSET 125.00 KHz  
OBFIN 10500.00 Hz  
PW1 6.00 usec  
DEADT 19.10 usec  
PREDL 0.20000 msec  
IWT 1.0000 msec  
POINT 32768  
SPO 32768  
TIMES 20000  
DUMMY 1  
FREQU 27118.64 Hz  
FLT 13550 Hz  
DELAY 14.80 usec  
ACQTM 1.2083 sec  
PD 1.7920 sec  
ADBIT 16  
RGAIN 24  
BF 0.10 Hz  
T1 0.00  
T2 0.00  
T3 90.00  
T4 100.00  
EXMOD BCM  
EXPCM Bilevel.complete.decoupling.Set\_IRRF  
IRNUC 1H  
IFR 399.65 MHz  
IRSET 124.00 KHz  
IRFIN 10500.00 Hz  
IRRPW 45 usec  
IRATN 511  
DFILE \_DEFAULT.ALS  
SF TH5ATFG2  
LKSET 61.60 KHz  
LKFIN 79.0 Hz  
LKLEV 180  
LGAIN 23  
LKPHS 238  
LKSIG 1022  
CSPED 12 Hz  
FILDC  
FILDF

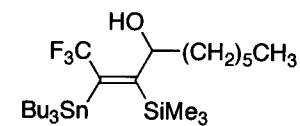

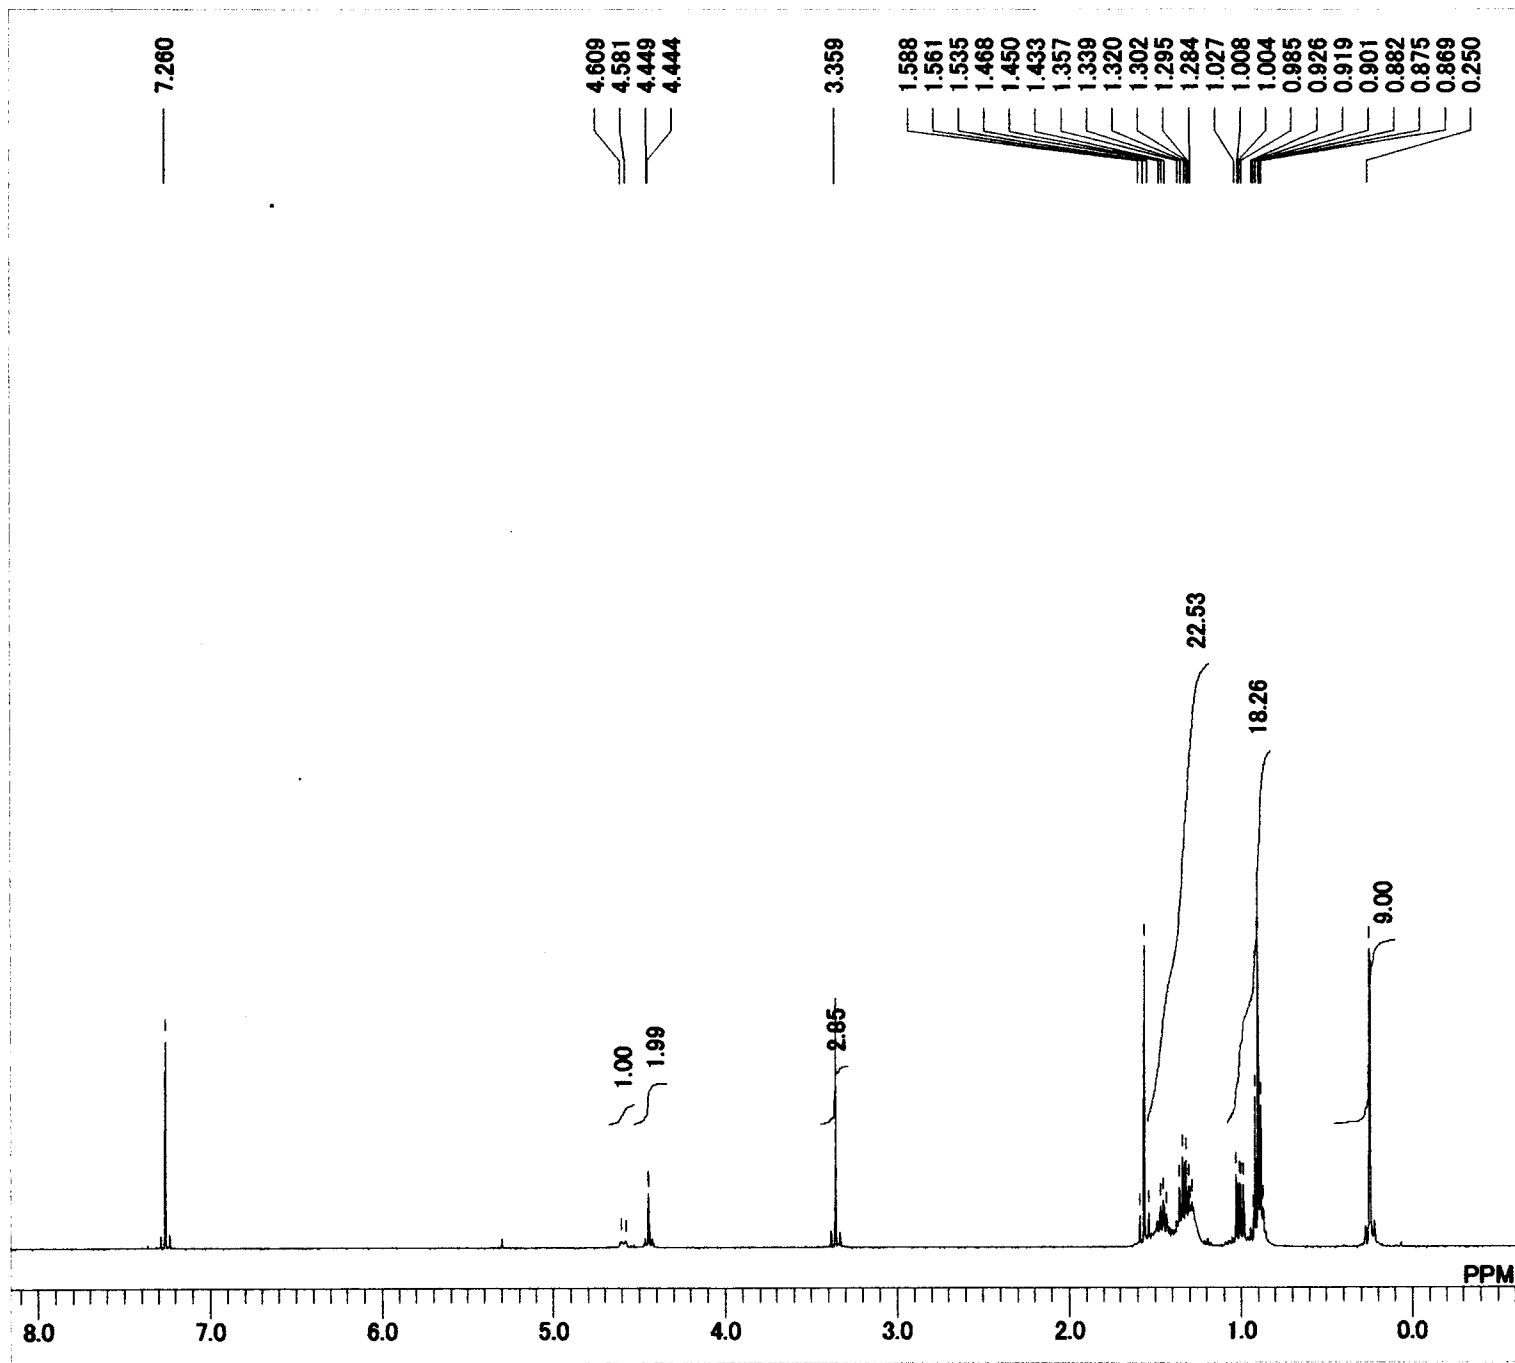

|       |                                 |
|-------|---------------------------------|
| MENUF | 1H                              |
| OBNUC | 1H                              |
| OFR   | 399.65 MHz                      |
| OBSET | 135.40 KHz                      |
| OBFIN | 24.90 Hz                        |
| PW1   | 5.80 usec                       |
| DEADT | 72.10 usec                      |
| PREDL | 0.20000 msec                    |
| IWT   | 1.0000 msec                     |
| POINT | 16384                           |
| SPO   | 16384                           |
| TIMES | 8                               |
| DUMMY | 1                               |
| FREQU | 7992.01 Hz                      |
| FLT   | 4000 Hz                         |
| DELAY | 50.00 usec                      |
| ACQTM | 2.0501 sec                      |
| PD    | 4.9500 sec                      |
| ADBIT | 16                              |
| RGAIN | 17                              |
| BF    | 0.10 Hz                         |
| T1    | 0.00                            |
| T2    | 0.00                            |
| T3    | 90.00                           |
| T4    | 100.00                          |
| EXMOD | NON                             |
| EXPCM | NON:Single.coupled:PW1_ACQTM_PL |
| IRNUC | 1H                              |
| IFR   | 399.65 MHz                      |
| IRSET | 136.90 KHz                      |
| IRFIN | 97.50 Hz                        |
| IRRPW | 45 usec                         |
| IRATN | 511                             |
| DFILE | _DEFAULT.ALS                    |
| SF    | TH5ATFG20                       |
| LKSET | 61.60 KHz                       |
| LKFIN | 79.0 Hz                         |
| LKLEV | 180                             |
| LGAIN | 25                              |
| LKPHS | 231                             |
| LKSIG | 2001                            |
| CSPED | 11 Hz                           |
| FILDC |                                 |
| FILDF |                                 |

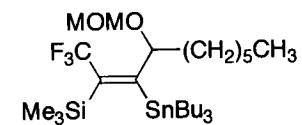



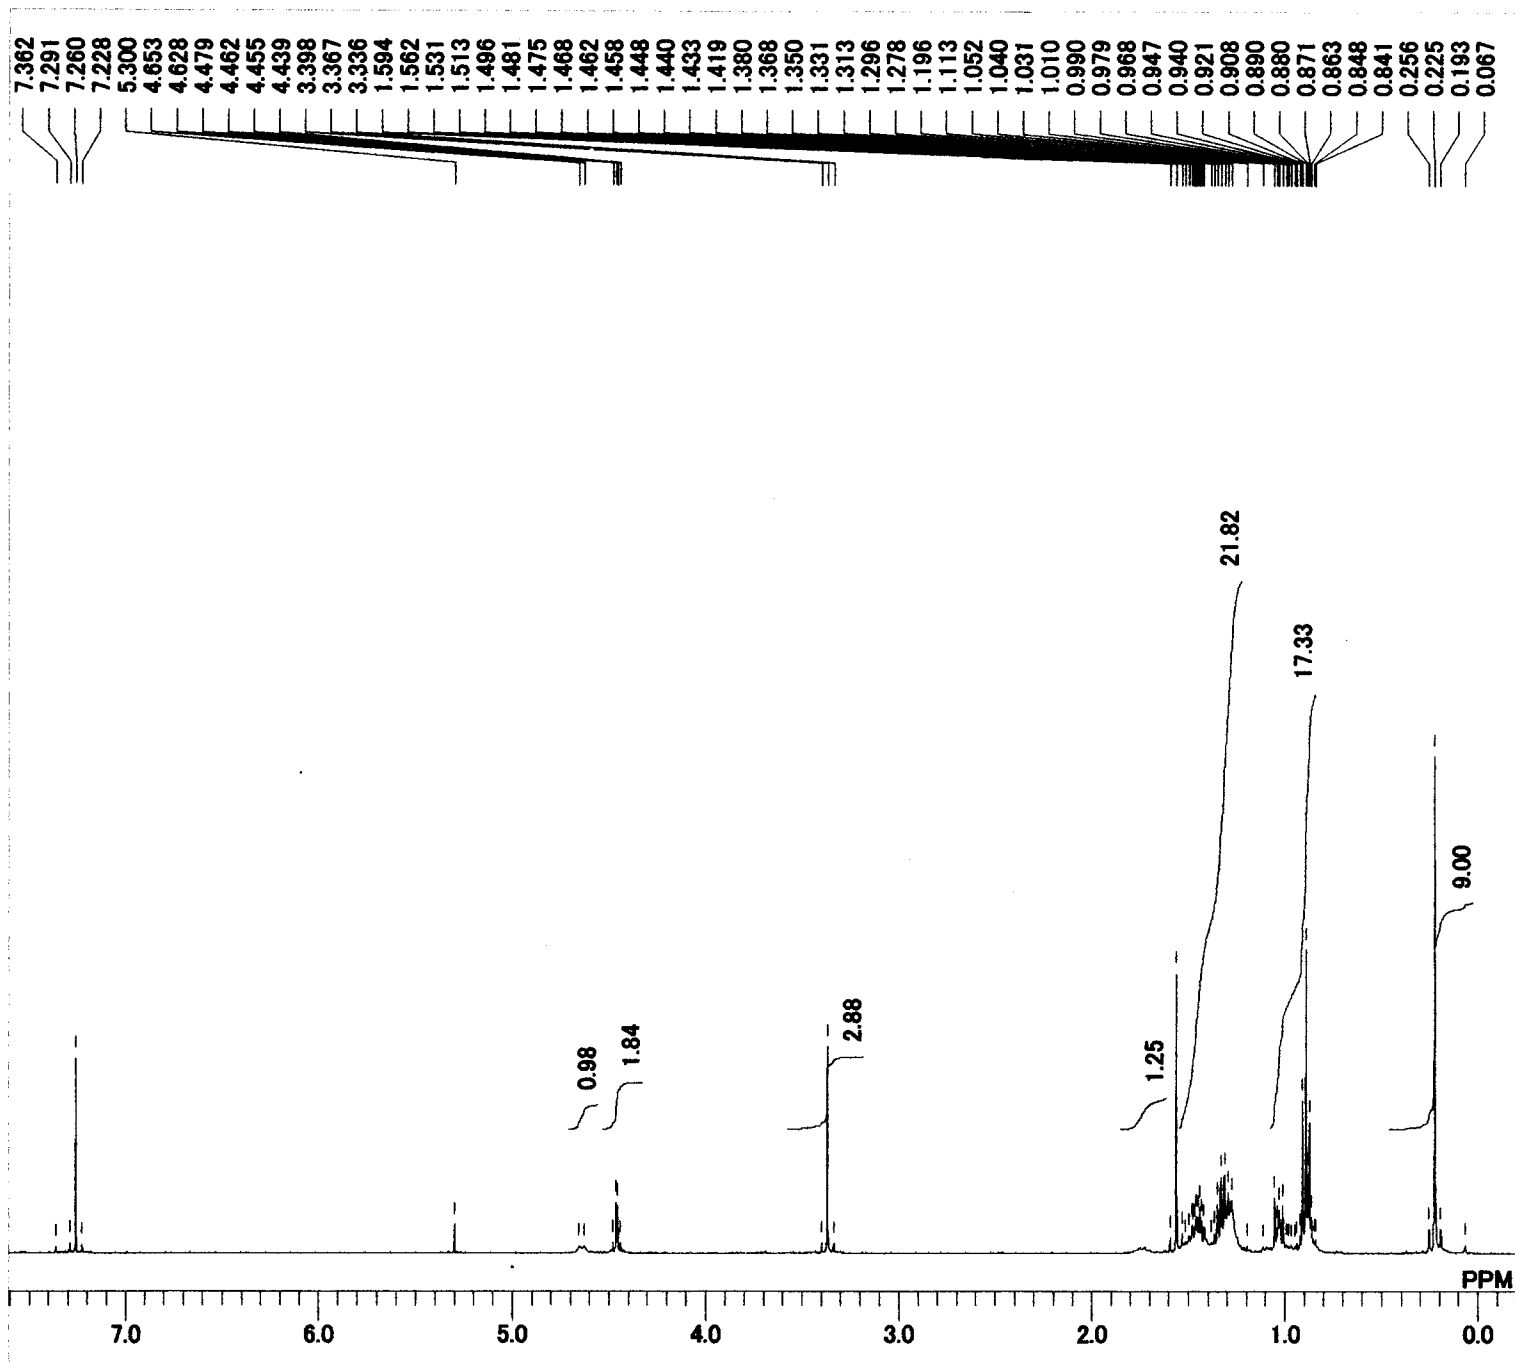

|       |                                 |
|-------|---------------------------------|
| MENUF | 1H                              |
| OBNUC | 1H                              |
| OFR   | 399.65 MHz                      |
| OBSET | 135.40 KHz                      |
| OBFIN | 24.90 Hz                        |
| PW1   | 5.80 usec                       |
| DEADT | 72.10 usec                      |
| PREDL | 0.20000 msec                    |
| IWT   | 1.0000 msec                     |
| POINT | 16384                           |
| SPO   | 16384                           |
| TIMES | 8                               |
| DUMMY | 1                               |
| FREQU | 7992.01 Hz                      |
| FLT   | 4000 Hz                         |
| DELAY | 50.00 usec                      |
| ACQTM | 2.0501 sec                      |
| PD    | 4.9500 sec                      |
| ADBIT | 16                              |
| RGAIN | 17                              |
| BF    | 0.10 Hz                         |
| T1    | 0.00                            |
| T2    | 0.00                            |
| T3    | 90.00                           |
| T4    | 100.00                          |
| EXMOD | NON                             |
| EXPCM | NON:Single.coupled:PW1_ACQTM_PI |
| IRNUC | 1H                              |
| IFR   | 399.65 MHz                      |
| IRSET | 136.90 KHz                      |
| IRFIN | 97.50 Hz                        |
| IRRPW | 45 usec                         |
| IRATN | 511                             |
| DFILE | CF3-OMOM-(CH2)5CH3-Sn-Si (1H)   |
| SF    | TH5ATFG20                       |
| LKSET | 61.60 KHz                       |
| LKFIN | 79.0 Hz                         |
| LKLEV | 180                             |
| LGAIN | 21                              |
| LKPHS | 231                             |
| LKSIG | 682                             |
| CSPED | 13 Hz                           |
| FILDC |                                 |
| FILDF |                                 |

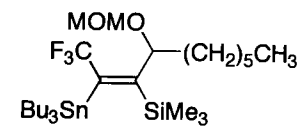



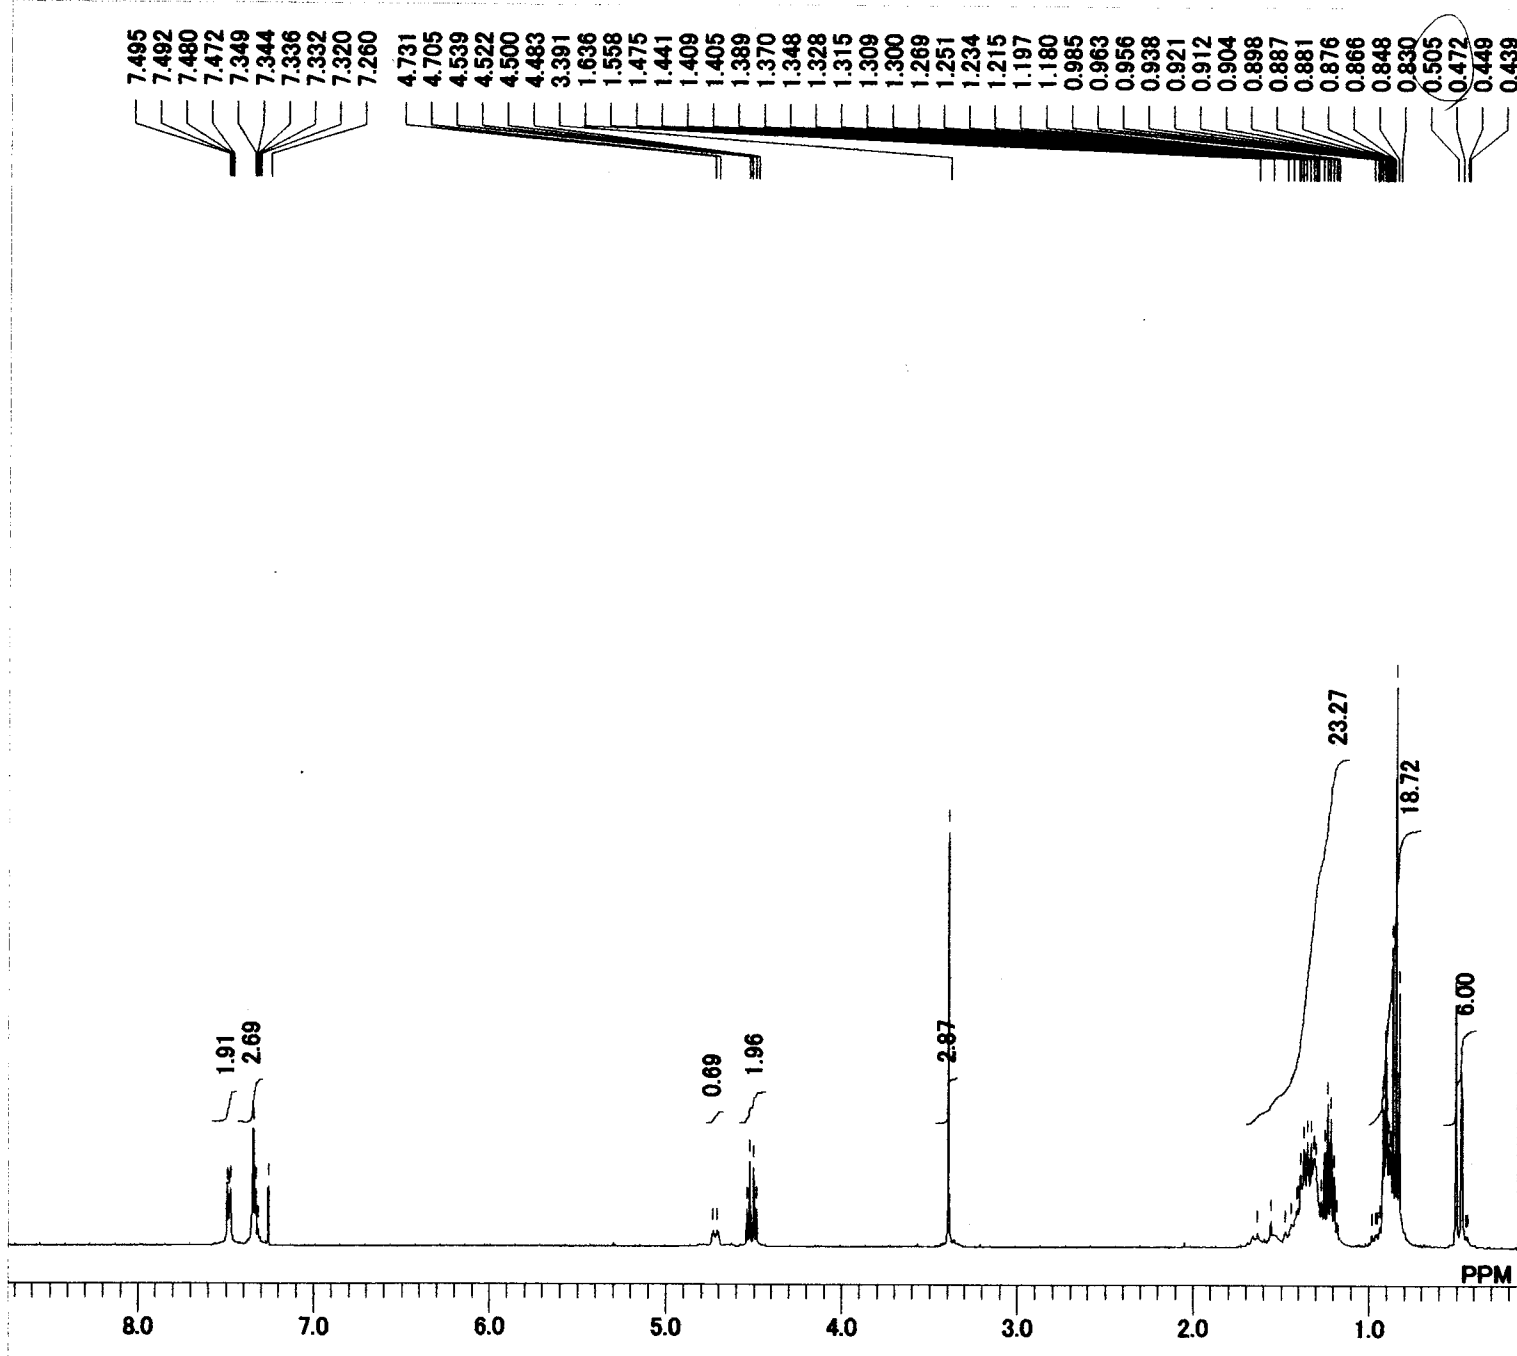

|       |                                 |
|-------|---------------------------------|
| MENUF | 1H                              |
| OBNUC | 1H                              |
| OFR   | 399.65 MHz                      |
| OBSET | 135.40 KHz                      |
| OBFIN | 24.90 Hz                        |
| PW1   | 5.50 usec                       |
| DEADT | 72.20 usec                      |
| PREDL | 0.20000 msec                    |
| IWT   | 1.0000 msec                     |
| POINT | 16384                           |
| SPO   | 16384                           |
| TIMES | 8                               |
| DUMMY | 1                               |
| FREQU | 7992.01 Hz                      |
| FLT   | 4000 Hz                         |
| DELAY | 50.00 usec                      |
| ACQTM | 2.0501 sec                      |
| PD    | 4.9500 sec                      |
| ADBIT | 16                              |
| RGAIN | 12                              |
| BF    | 0.10 Hz                         |
| T1    | 0.00                            |
| T2    | 0.00                            |
| T3    | 90.00                           |
| T4    | 100.00                          |
| EXMOD | NON                             |
| EXPCM | NON:Single.coupled:PW1_ACQTM_PI |
| IRNUC | 1H                              |
| IFR   | 399.65 MHz                      |
| IRSET | 136.90 KHz                      |
| IRFIN | 97.50 Hz                        |
| IRRPW | 45 usec                         |
| IRATN | 511                             |
| DFILE | _DEFAULT.ALS                    |
| SF    | TH5ATFG2                        |
| LKSET | 61.60 KHz                       |
| LKFIN | 79.0 Hz                         |
| LKLEV | 180                             |
| LGAIN | 22                              |
| LKPHS | 240                             |
| LKSIG | 743                             |
| CSPED | 14 Hz                           |
| FILDC |                                 |
| FILDF |                                 |

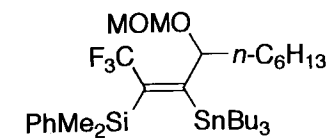





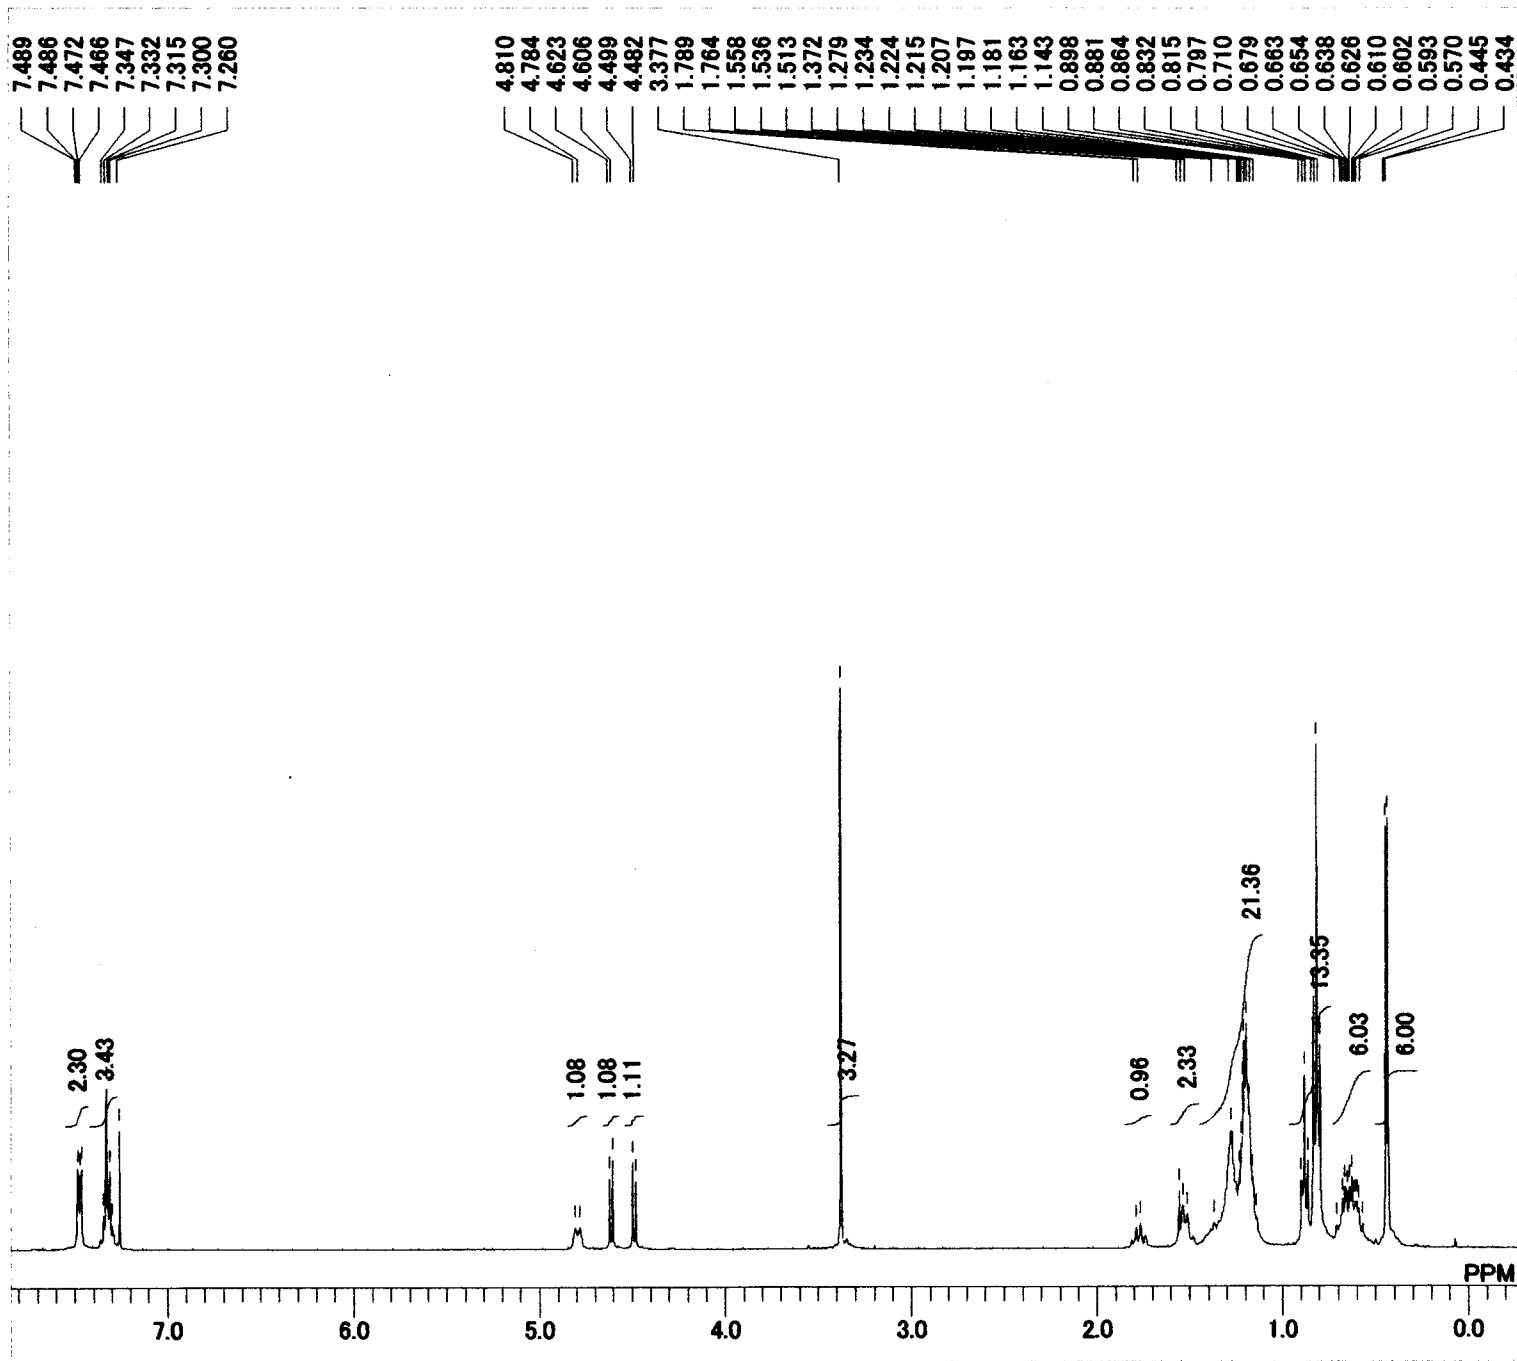

|       |                                 |
|-------|---------------------------------|
| MENUF | 1H                              |
| OBNUC | 1H                              |
| OFR   | 399.65 MHz                      |
| OBSET | 135.40 KHz                      |
| OBFIN | 24.90 Hz                        |
| PW1   | 5.50 usec                       |
| DEADT | 72.20 usec                      |
| PREDL | 0.20000 msec                    |
| IWT   | 1.0000 msec                     |
| POINT | 16384                           |
| SPO   | 16384                           |
| TIMES | 8                               |
| DUMMY | 1                               |
| FREQU | 7992.01 Hz                      |
| FLT   | 4000 Hz                         |
| DELAY | 50.00 usec                      |
| ACQTM | 2.0501 sec                      |
| PD    | 4.9500 sec                      |
| ADBIT | 16                              |
| RGAIN | 13                              |
| BF    | 0.10 Hz                         |
| T1    | 0.00                            |
| T2    | 0.00                            |
| T3    | 90.00                           |
| T4    | 100.00                          |
| EXMOD | NON                             |
| EXPCM | NON:Single.coupled:PW1_ACQTM_PC |
| IRNUC | 1H                              |
| IFR   | 399.65 MHz                      |
| IRSET | 136.90 KHz                      |
| IRFIN | 97.50 Hz                        |
| IRRPW | 45 usec                         |
| IRATN | 511                             |
| DFILE | DEFAULT.ALS                     |
| SF    | TH5ATFG2                        |
| LKSET | 61.60 KHz                       |
| LKFIN | 79.0 Hz                         |
| LKLEV | 180                             |
| LGAIN | 21                              |
| LKPHS | 240                             |
| LKSIG | 576                             |
| CSPED | 12 Hz                           |
| FILDC |                                 |
| FILDF |                                 |

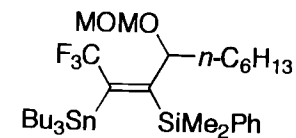



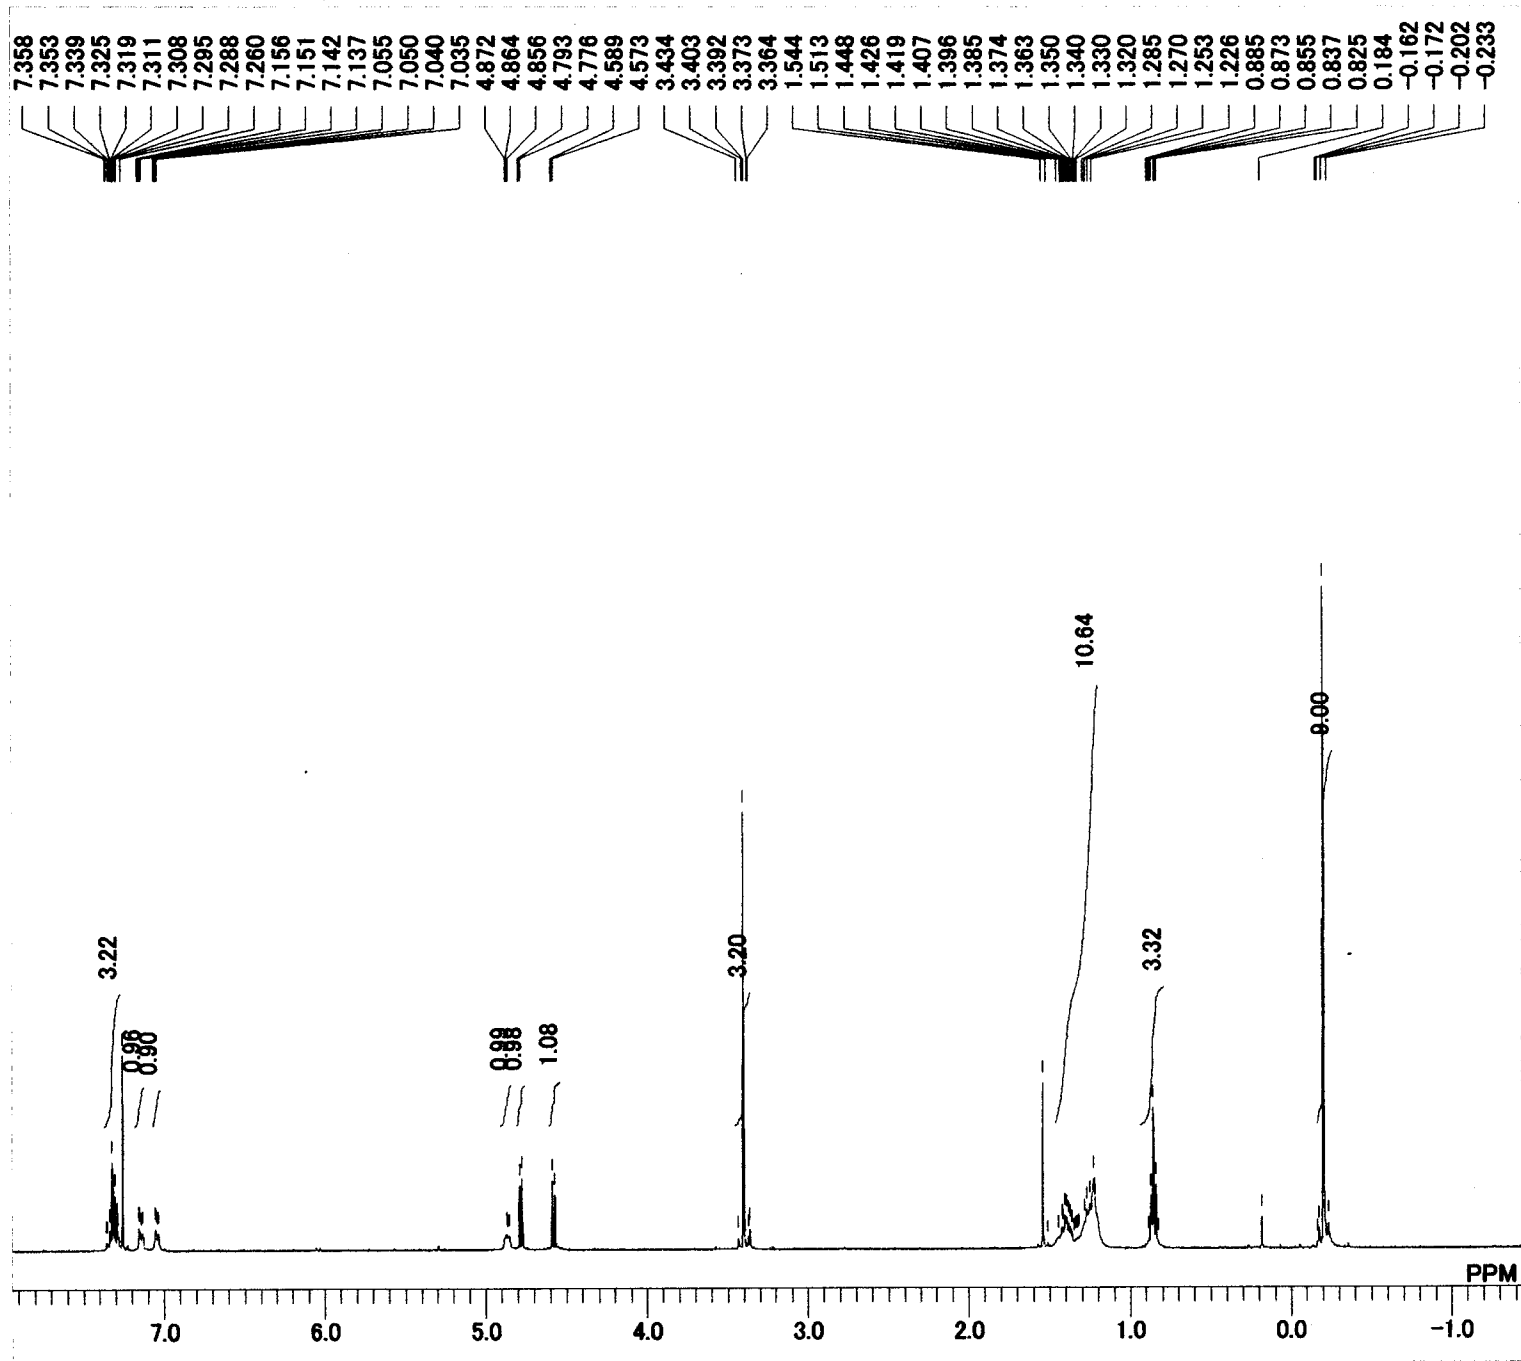

|       |                                 |
|-------|---------------------------------|
| MENUF | 1H                              |
| OBNUC | 1H                              |
| OFR   | 399.65 MHz                      |
| OBSET | 135.40 KHz                      |
| OBFIN | 24.90 Hz                        |
| PW1   | 5.80 usec                       |
| DEADT | 72.10 usec                      |
| PREDL | 0.20000 msec                    |
| IWT   | 1.0000 msec                     |
| POINT | 16384                           |
| SPO   | 16384                           |
| TIMES | 8                               |
| DUMMY | 1                               |
| FREQU | 7992.01 Hz                      |
| FLT   | 4000 Hz                         |
| DELAY | 50.00 usec                      |
| ACQTM | 2.0501 sec                      |
| PD    | 4.9500 sec                      |
| ADBIT | 16                              |
| RGAIN | 18                              |
| BF    | 0.00 Hz                         |
| T1    | 0.00                            |
| T2    | 0.00                            |
| T3    | 90.00                           |
| T4    | 100.00                          |
| EXMOD | NON                             |
| EXPCM | NON:Single.coupled:PW1_ACQTM_PL |
| IRNUC | 1H                              |
| IFR   | 399.65 MHz                      |
| IRSET | 136.90 KHz                      |
| IRFIN | 97.50 Hz                        |
| IRRPW | 45 usec                         |
| IRATN | 511                             |
| DFILE | _DEFAULT.ALS                    |
| SF    | TH5ATFG2                        |
| LKSET | 61.60 KHz                       |
| LKFIN | 79.0 Hz                         |
| LKLEV | 180                             |
| LGAIN | 22                              |
| LKPHS | 203                             |
| LKSIG | 552                             |
| CSPED | 13 Hz                           |
| FILDC |                                 |
| FILDF |                                 |

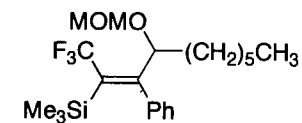

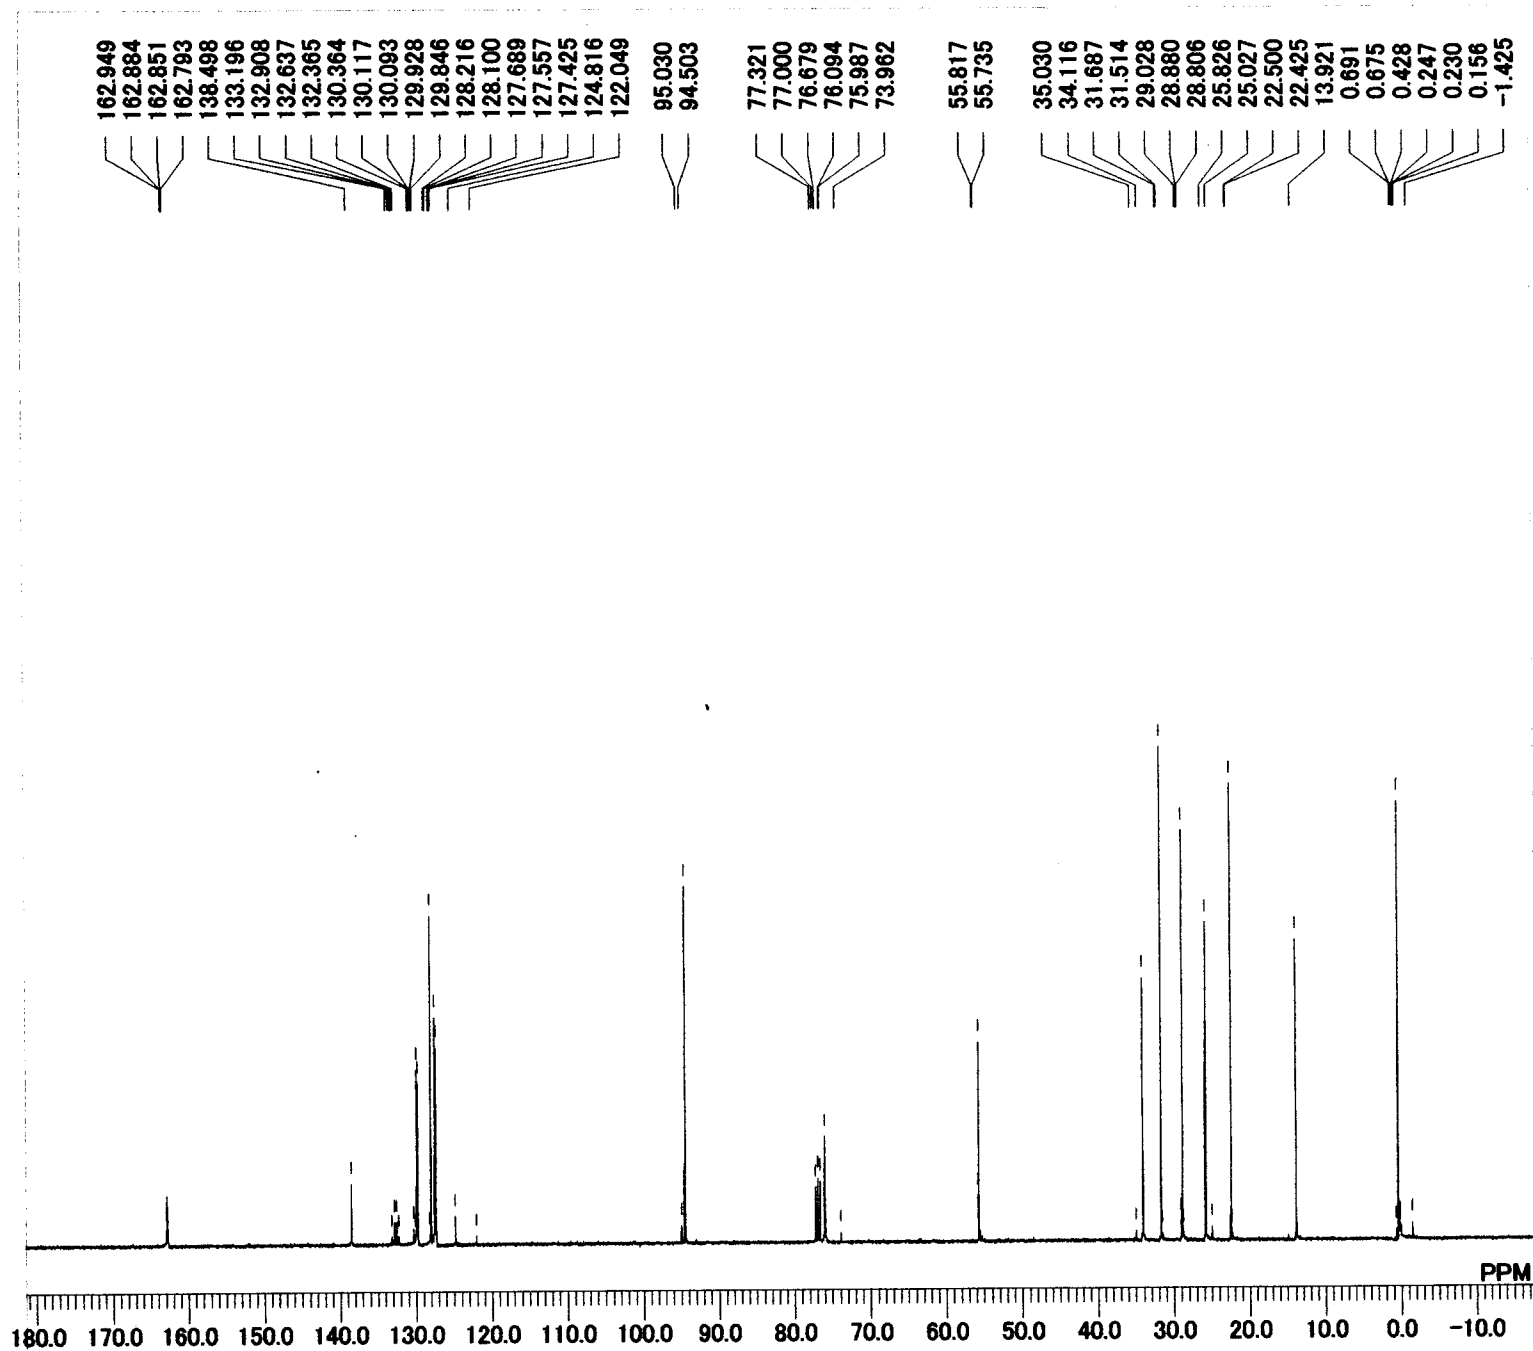

|       |                                      |
|-------|--------------------------------------|
| MENUF | 13C                                  |
| OBNUC | 13C                                  |
| OFR   | 100.40 MHz                           |
| OBSET | 125.00 KHz                           |
| OBFIN | 10500.00 Hz                          |
| PW1   | 6.00 usec                            |
| DEADT | 19.10 usec                           |
| PREDL | 0.20000 msec                         |
| IWT   | 1.0000 msec                          |
| POINT | 32768                                |
| SPO   | 32768                                |
| TIMES | 1000                                 |
| DUMMY | 1                                    |
| FREQU | 27118.64 Hz                          |
| FLT   | 13550 Hz                             |
| DELAY | 14.80 usec                           |
| ACQTM | 1.2083 sec                           |
| PD    | 1.7920 sec                           |
| ADBIT | 16                                   |
| RGAIN | 23                                   |
| BF    | 0.10 Hz                              |
| T1    | 0.00                                 |
| T2    | 0.00                                 |
| T3    | 90.00                                |
| T4    | 100.00                               |
| EXMOD | BCM                                  |
| EXPCM | Bilevel.complete.decoupling.Set_IRRF |
| IRNUC | 1H                                   |
| IFR   | 399.65 MHz                           |
| IRSET | 124.00 KHz                           |
| IRFIN | 10500.00 Hz                          |
| IRRPW | 45 usec                              |
| IRATN | 511                                  |
| DFILE | CF3-OMOM-(CH2)5CH3-Si-ph Si          |
| SF    | TH5ATFG2                             |
| LKSET | 61.60 KHz                            |
| LKFIN | 79.0 Hz                              |
| LKLEV | 180                                  |
| LGAIN | 28                                   |
| LKPHS | 203                                  |
| LKSIG | 490                                  |
| CSPED | 12 Hz                                |
| FILDC |                                      |
| FILDF |                                      |

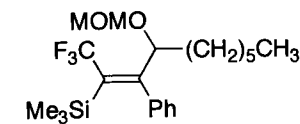

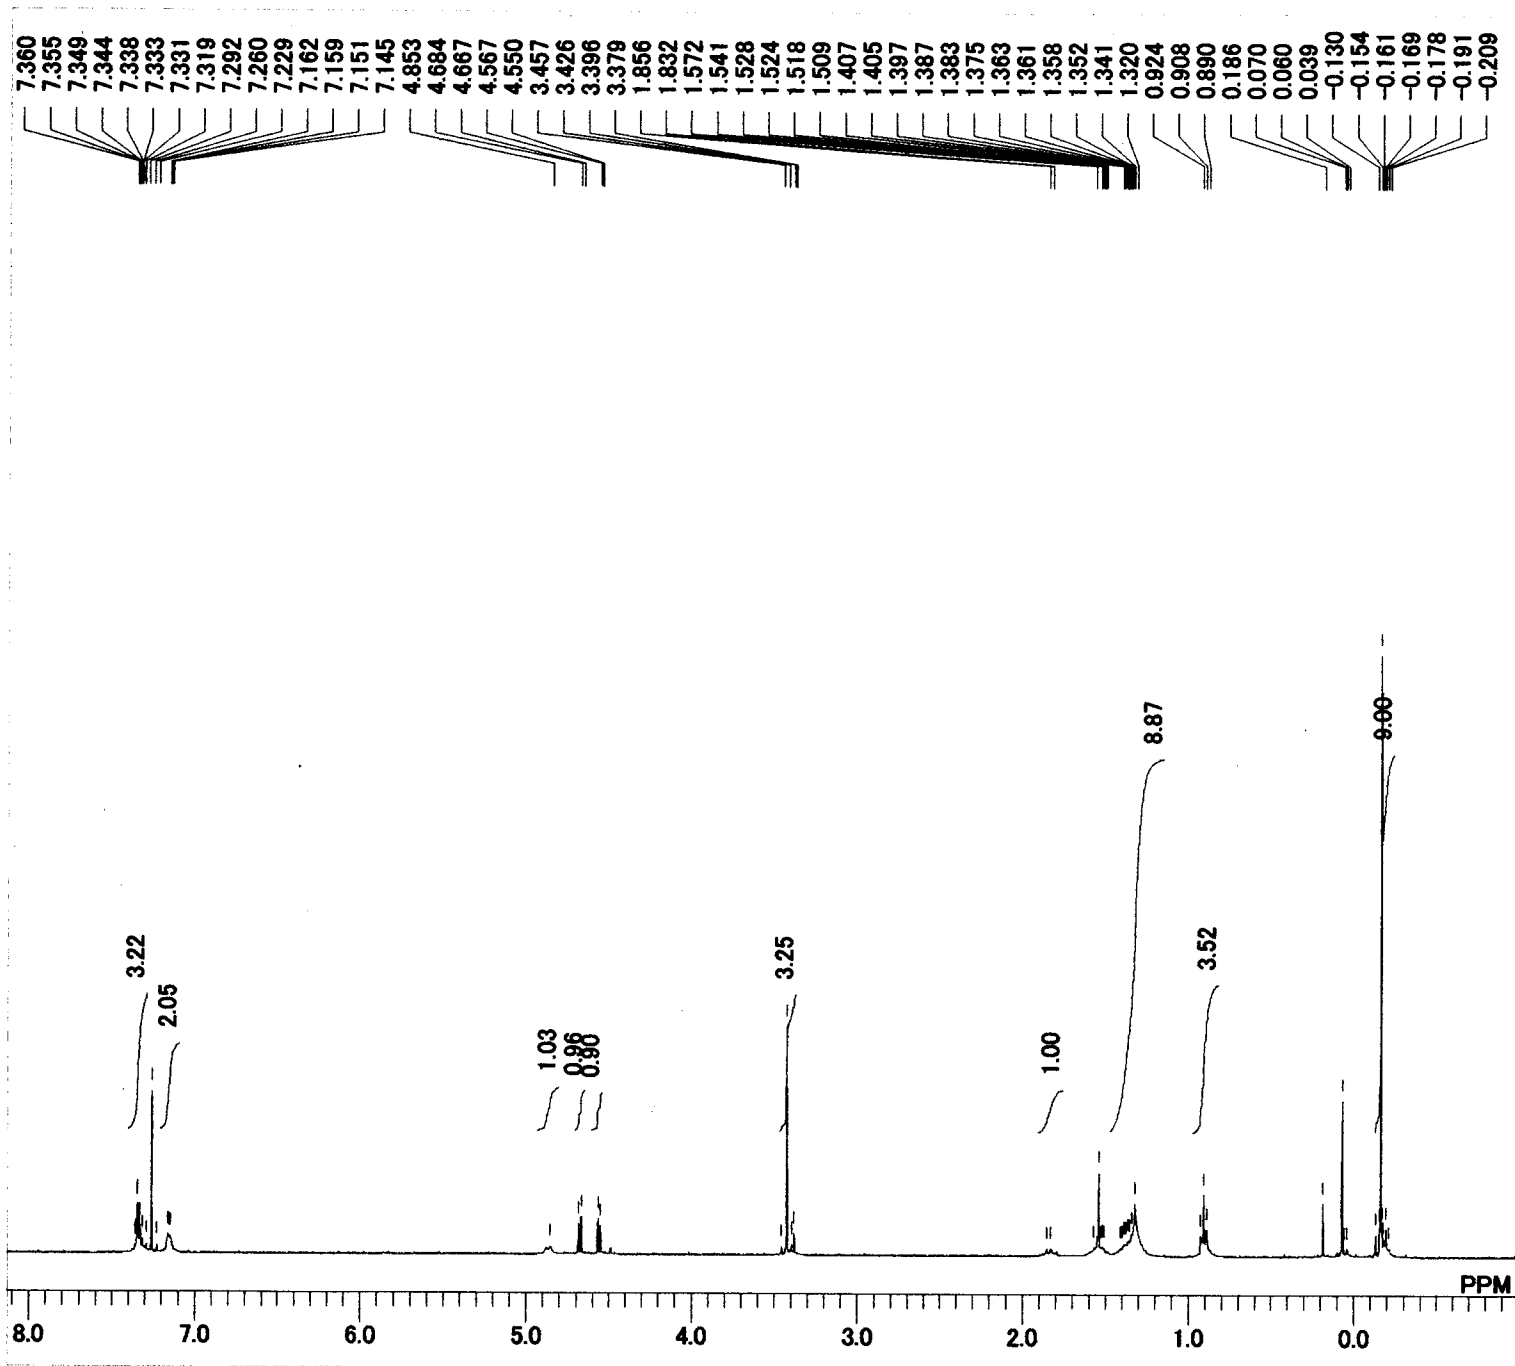

|       |                                 |
|-------|---------------------------------|
| MENUF | 1H                              |
| OBNUC | 1H                              |
| OFR   | 399.65 MHz                      |
| OBSET | 135.40 KHz                      |
| OBFIN | 24.90 Hz                        |
| PW1   | 5.80 usec                       |
| DEADT | 72.10 usec                      |
| PREDL | 0.20000 msec                    |
| IWT   | 1.0000 msec                     |
| POINT | 16384                           |
| SPO   | 16384                           |
| TIMES | 8                               |
| DUMMY | 1                               |
| FREQU | 7992.01 Hz                      |
| FLT   | 4000 Hz                         |
| DELAY | 50.00 usec                      |
| ACQTM | 2.0501 sec                      |
| PD    | 4.9500 sec                      |
| ADBIT | 16                              |
| RGAIN | 21                              |
| BF    | 0.10 Hz                         |
| T1    | 0.00                            |
| T2    | 0.00                            |
| T3    | 90.00                           |
| T4    | 100.00                          |
| EXMOD | NON                             |
| EXPCM | NON:Single.coupled:PW1_ACQTM_PE |
| IRNUC | 1H                              |
| IFR   | 399.65 MHz                      |
| IRSET | 136.90 KHz                      |
| IRFIN | 97.50 Hz                        |
| IRRPW | 45 usec                         |
| IRATN | 511                             |
| DFILE | _DEFAULT.ALS                    |
| SF    | TH5ATFG2                        |
| LKSET | 61.60 KHz                       |
| LKFIN | 79.0 Hz                         |
| LKLEV | 180                             |
| LGAIN | 23                              |
| LKPHS | 203                             |
| LKSIG | 810                             |
| CSPED | 13 Hz                           |
| FILDC |                                 |
| FILDF |                                 |

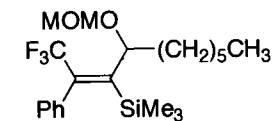



C:\WINNMR\DATA\Fluorine\ききめがわ\Si-Sn 物性値\CF3-ph-p-OMe-H-Si (1H) Rxn.290.als

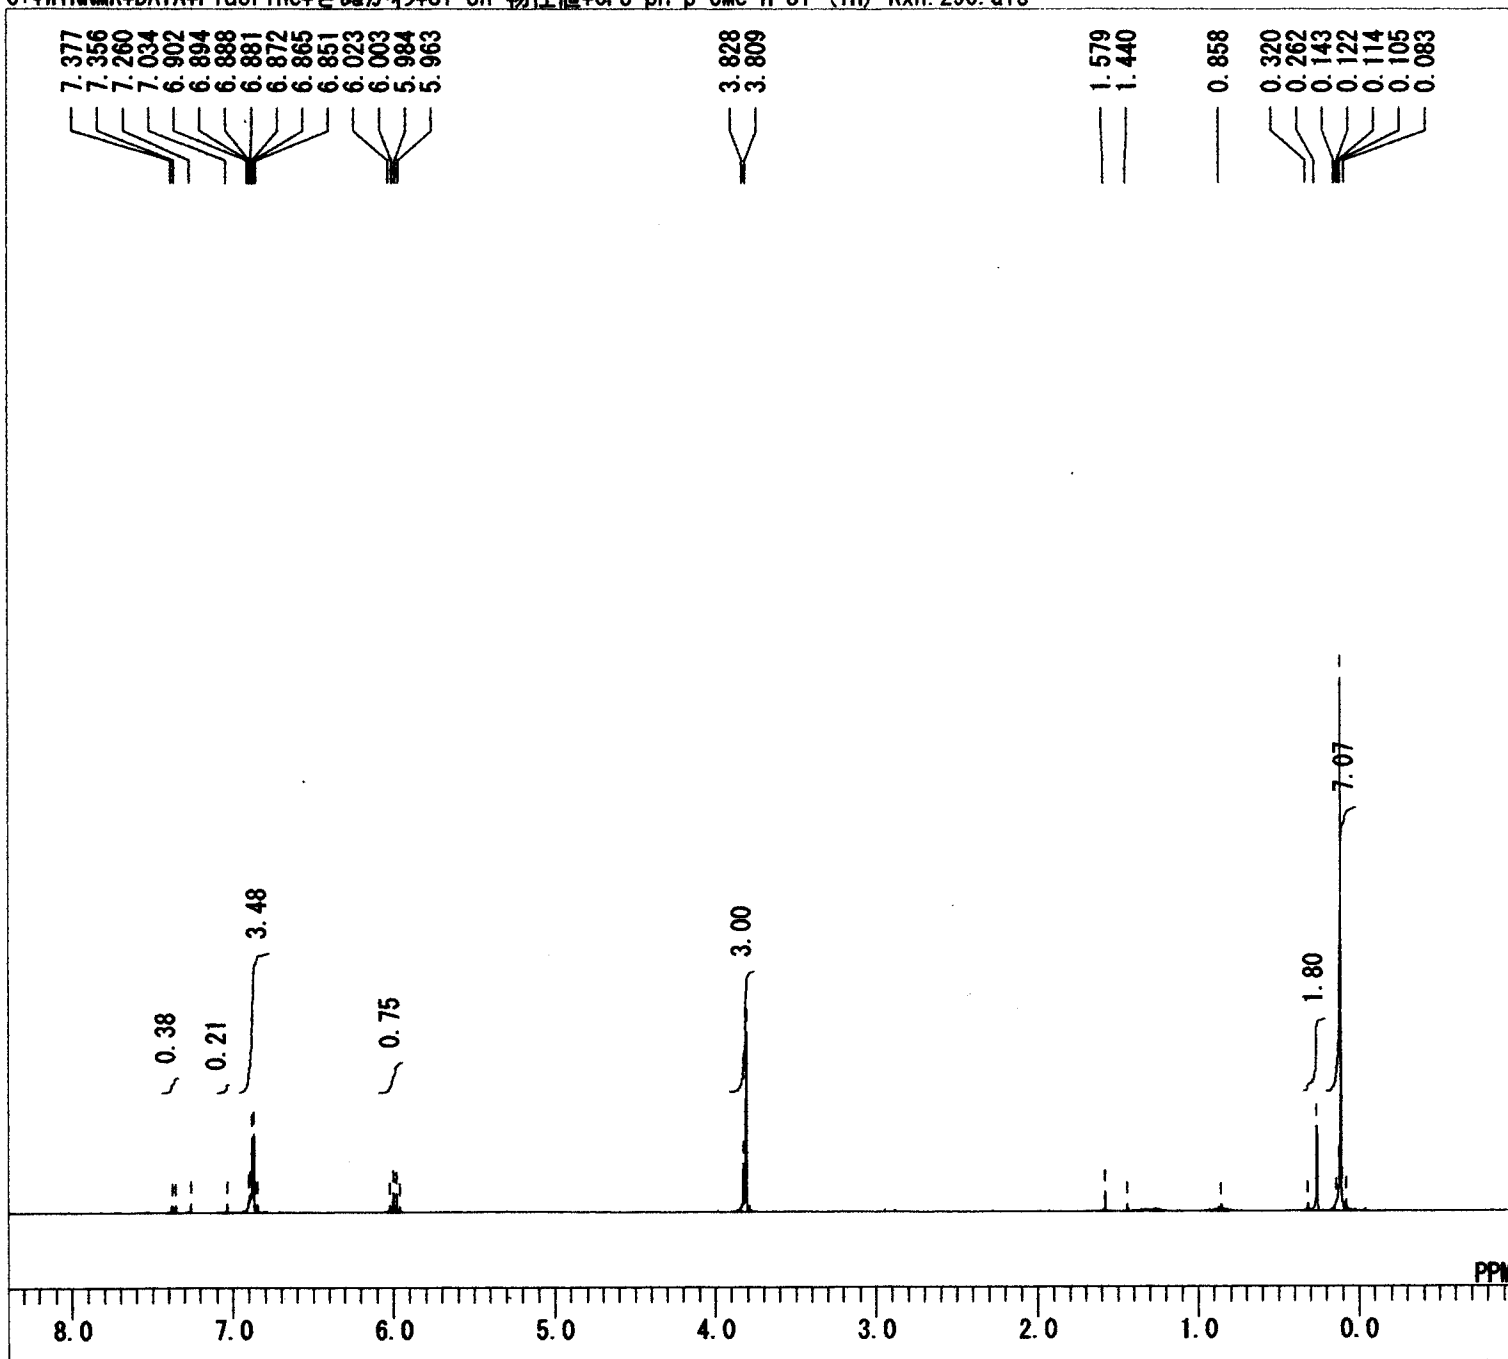

|       |                               |
|-------|-------------------------------|
| MENUF | 1H                            |
| OBNUC | 1H                            |
| OFR   | 399.65 MHz                    |
| OBSET | 135.40 KHz                    |
| OBFIN | 24.90 Hz                      |
| PW1   | 5.80 usec                     |
| DEADT | 72.10 usec                    |
| PREDL | 0.20000 msec                  |
| IWT   | 1.0000 msec                   |
| POINT | 16384                         |
| SPO   | 16384                         |
| TIMES | 8                             |
| DUMMY | 1                             |
| FREQU | 7992.01 Hz                    |
| FLT   | 4000 Hz                       |
| DELAY | 50.00 usec                    |
| ACQTM | 2.0501 sec                    |
| PD    | 4.9500 sec                    |
| ADBIT | 16                            |
| RGAIN | 12                            |
| BF    | 0.10 Hz                       |
| T1    | 0.00                          |
| T2    | 0.00                          |
| T3    | 90.00                         |
| T4    | 100.00                        |
| EXMOD | NON                           |
| EXPCM | NON:Single.coupled:PW1_ACQTM  |
| IRNUC | 1H                            |
| IFR   | 399.65 MHz                    |
| IRSET | 136.90 KHz                    |
| IRFIN | 97.50 Hz                      |
| IRRPW | 45 usec                       |
| IRATN | 511                           |
| DFILE | CF3-ph-p-OMe-H-Si (1H) Rxn.29 |
| SF    | TH5ATFG2                      |
| LKSET | 61.60 KHz                     |
| LKFIN | 79.0 Hz                       |
| LKLEV | 180                           |
| LGAIN | 22                            |
| LKPHS | 250                           |
| LKSIG | 700 Hz                        |
| CSPED | 12 Hz                         |
| FILDC |                               |
| FILDF |                               |

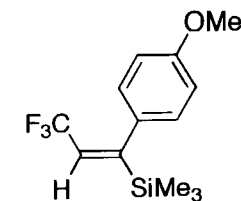

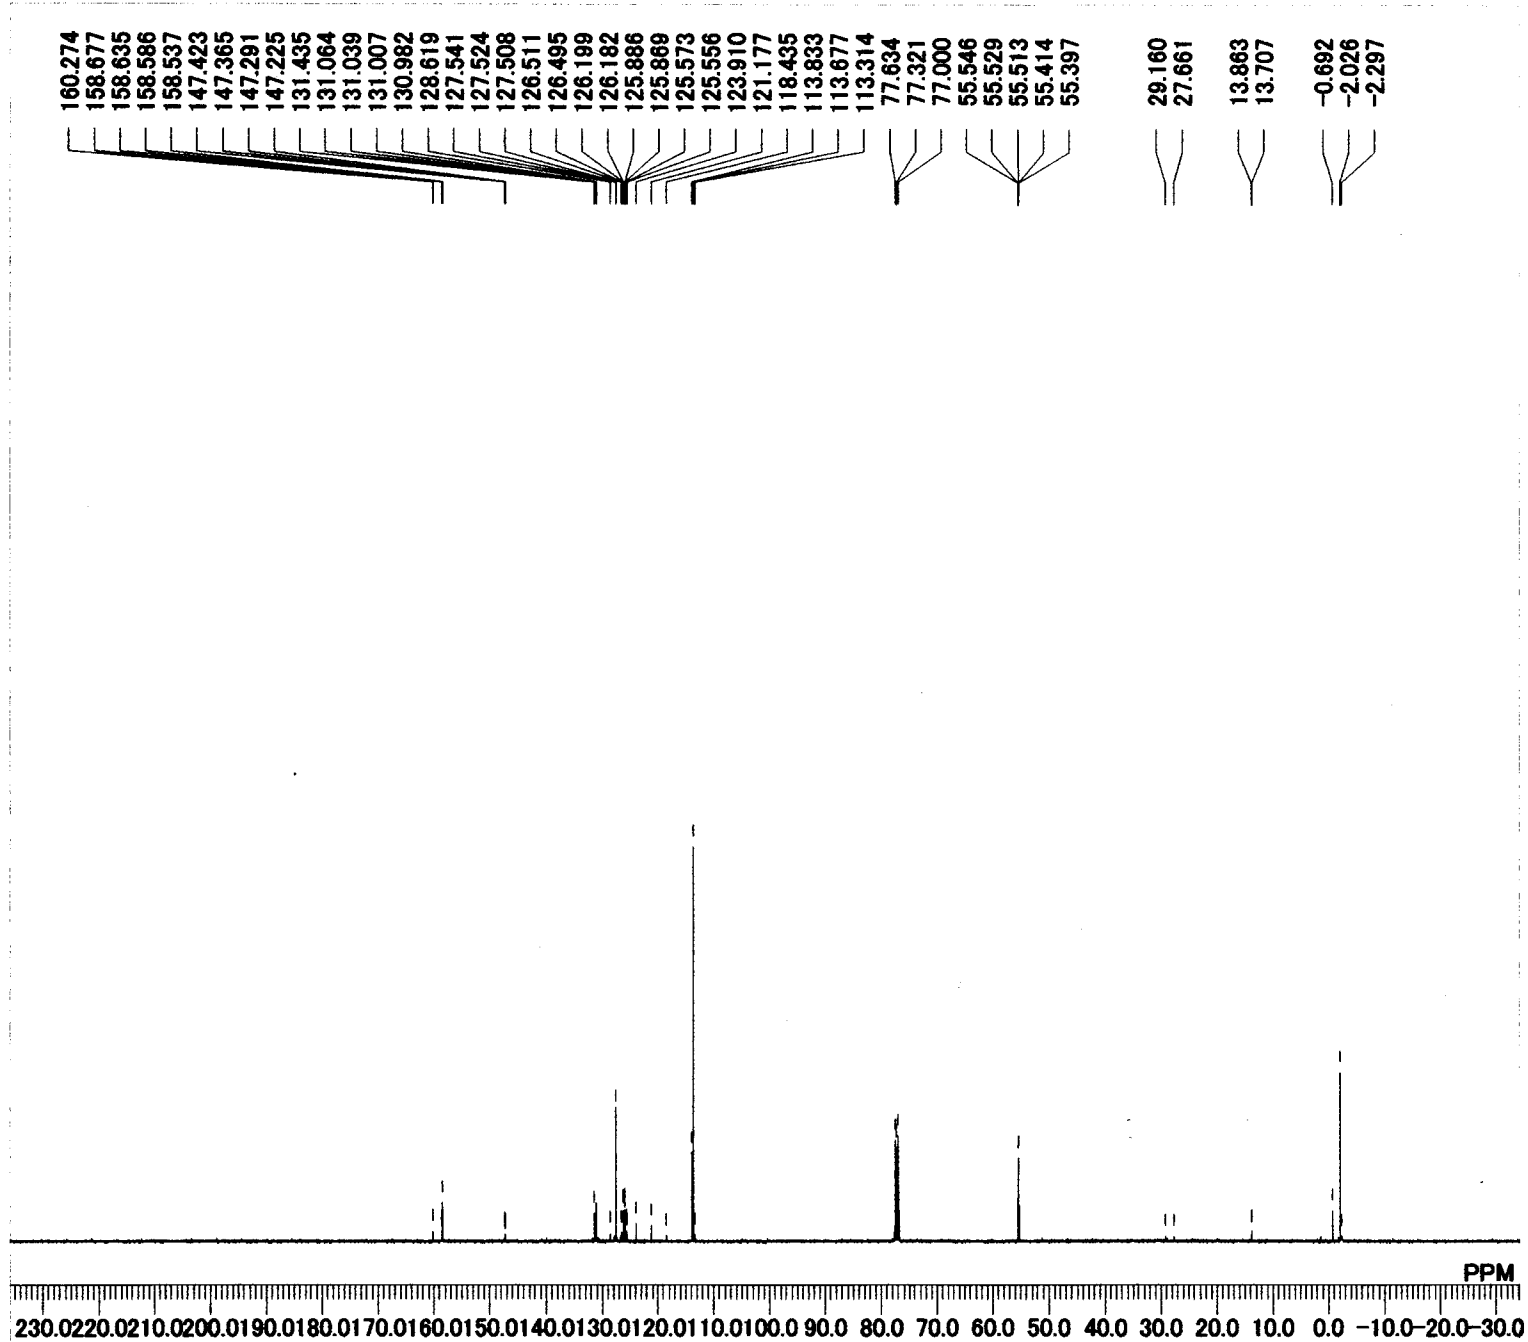

|       |                                      |
|-------|--------------------------------------|
| MENUF | 13C                                  |
| OBNUC | 13C                                  |
| OFR   | 100.40 MHz                           |
| OBSET | 125.00 KHz                           |
| OBFIN | 10500.00 Hz                          |
| PW1   | 6.20 usec                            |
| DEADT | 19.00 usec                           |
| PREDL | 0.20000 msec                         |
| IWT   | 1.0000 msec                          |
| POINT | 32768                                |
| SPO   | 32768                                |
| TIMES | 10000                                |
| DUMMY | 1                                    |
| FREQU | 27118.64 Hz                          |
| FLT   | 13550 Hz                             |
| DELAY | 14.80 usec                           |
| ACQTM | 1.2083 sec                           |
| PD    | 1.7920 sec                           |
| ADBIT | 16                                   |
| RGAIN | 25                                   |
| BF    | 0.00 Hz                              |
| T1    | 0.00                                 |
| T2    | 0.00                                 |
| T3    | 90.00                                |
| T4    | 100.00                               |
| EXMOD | BCM                                  |
| EXPCM | Bilevel.complete.decoupling:Set_IRRF |
| IRNUC | 1H                                   |
| IFR   | 399.65 MHz                           |
| IRSET | 124.00 KHz                           |
| IRFIN | 10500.00 Hz                          |
| IRRPW | 45 usec                              |
| IRATN | 511                                  |
| DFILE | _DEFAULT.ALS                         |
| SF    | TH5ATFG2                             |
| LKSET | 61.60 KHz                            |
| LKFIN | 79.0 Hz                              |
| LKLEV | 180                                  |
| LGAIN | 23                                   |
| LKPHS | 240                                  |
| LKSIG | 962                                  |
| CSPED | 12 Hz                                |
| FILDC |                                      |
| FILDF |                                      |

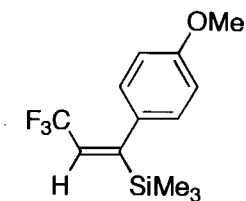



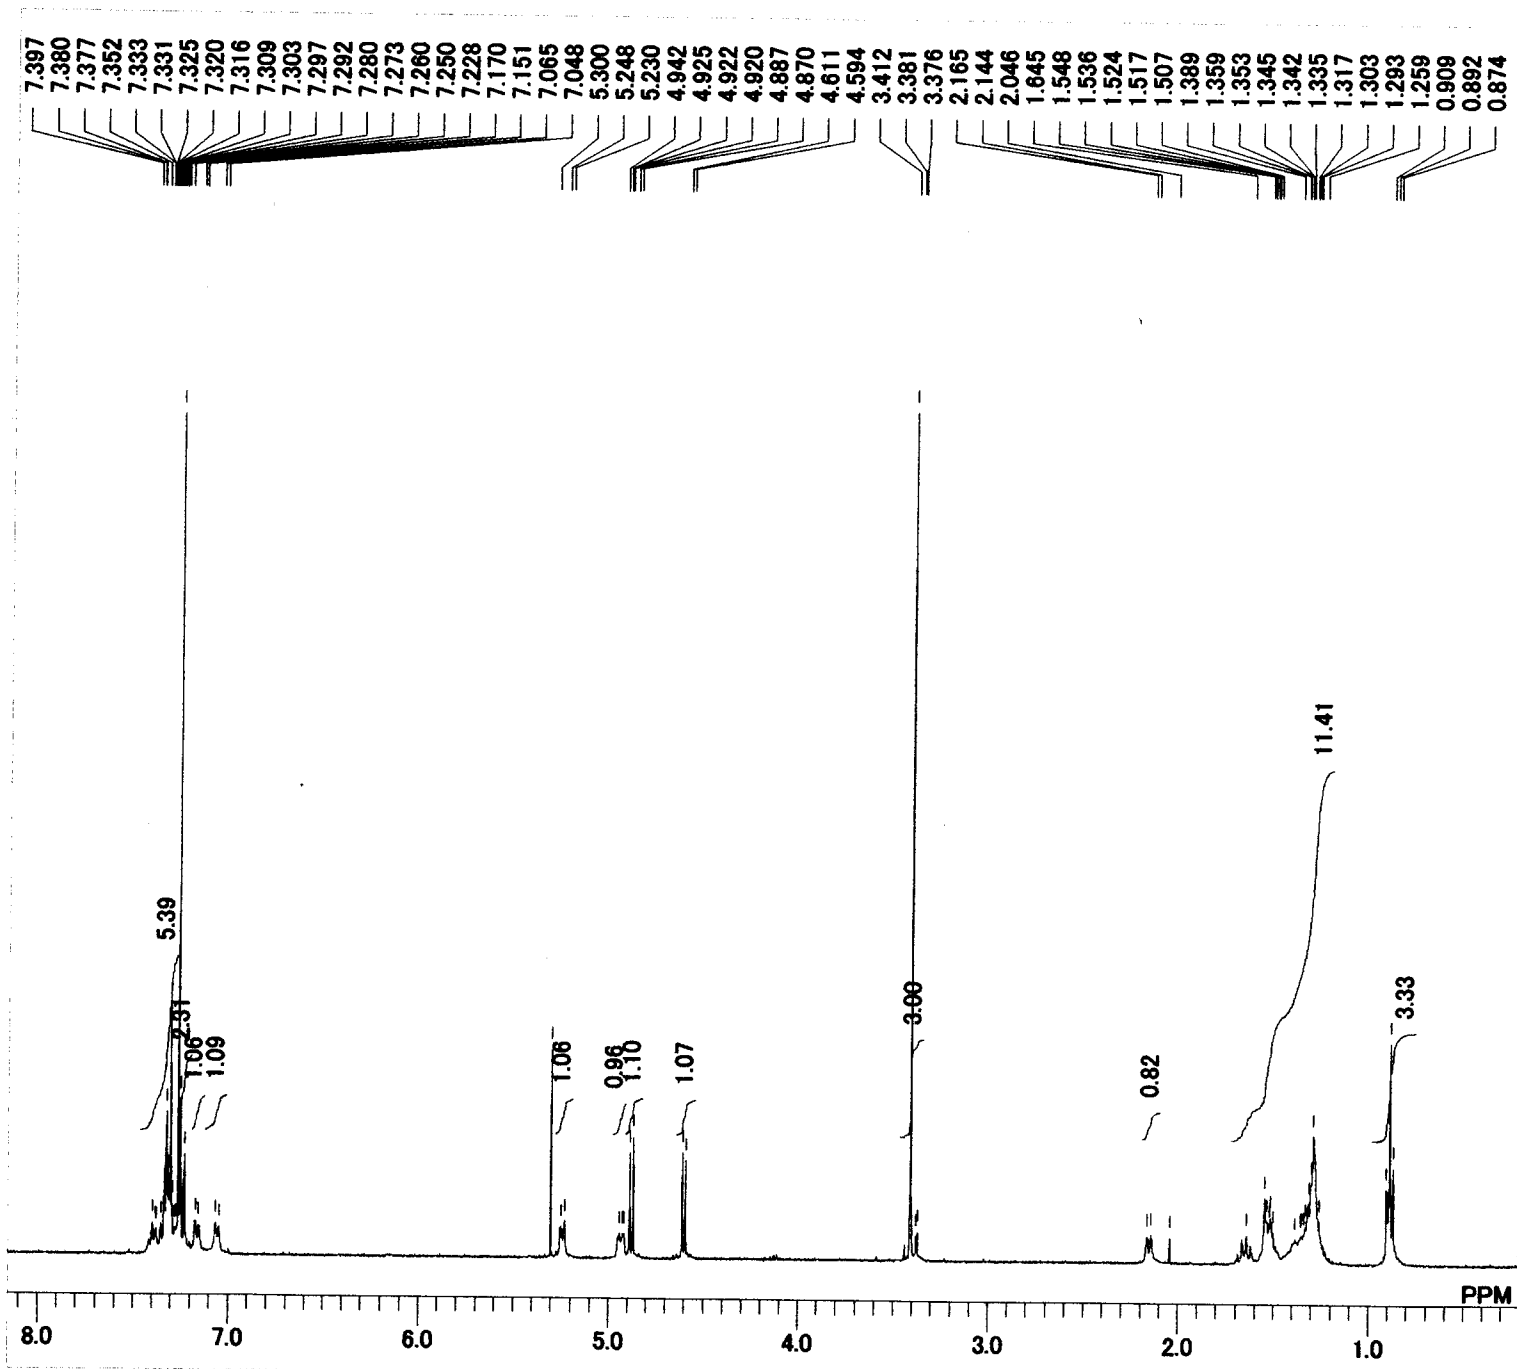

|       |                                 |
|-------|---------------------------------|
| MENUF | 1H                              |
| OBNUC | 1H                              |
| OFR   | 399.65 MHz                      |
| OBSET | 135.40 KHz                      |
| OBFIN | 24.90 Hz                        |
| PW1   | 5.50 usec                       |
| DEADT | 72.20 usec                      |
| PREDL | 0.20000 msec                    |
| IWT   | 1.0000 msec                     |
| POINT | 16384                           |
| SPO   | 16384                           |
| TIMES | 8                               |
| DUMMY | 1                               |
| FREQU | 7992.01 Hz                      |
| FLT   | 4000 Hz                         |
| DELAY | 50.00 usec                      |
| ACQTM | 2.0501 sec                      |
| PD    | 4.9500 sec                      |
| ADBIT | 16                              |
| RGAIN | 20                              |
| BF    | 0.10 Hz                         |
| T1    | 0.00                            |
| T2    | 0.00                            |
| T3    | 90.00                           |
| T4    | 100.00                          |
| EXMOD | NON                             |
| EXPCM | NON:Single.coupled:PW1_ACQTM_PI |
| IRNUC | 1H                              |
| IFR   | 399.65 MHz                      |
| IRSET | 136.90 KHz                      |
| IRFIN | 97.50 Hz                        |
| IRRPW | 45 usec                         |
| IRATN | 511                             |
| DFILE | _DEFAULT.ALS                    |
| SF    | TH5ATFG2                        |
| LKSET | 61.60 KHz                       |
| LKFIN | 79.0 Hz                         |
| LKLEV | 180                             |
| LGAIN | 21                              |
| LKPHS | 240                             |
| LKSIG | 623                             |
| CSPED | 12 Hz                           |
| FILDC |                                 |
| FILDF |                                 |

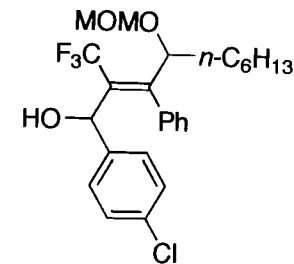

Major

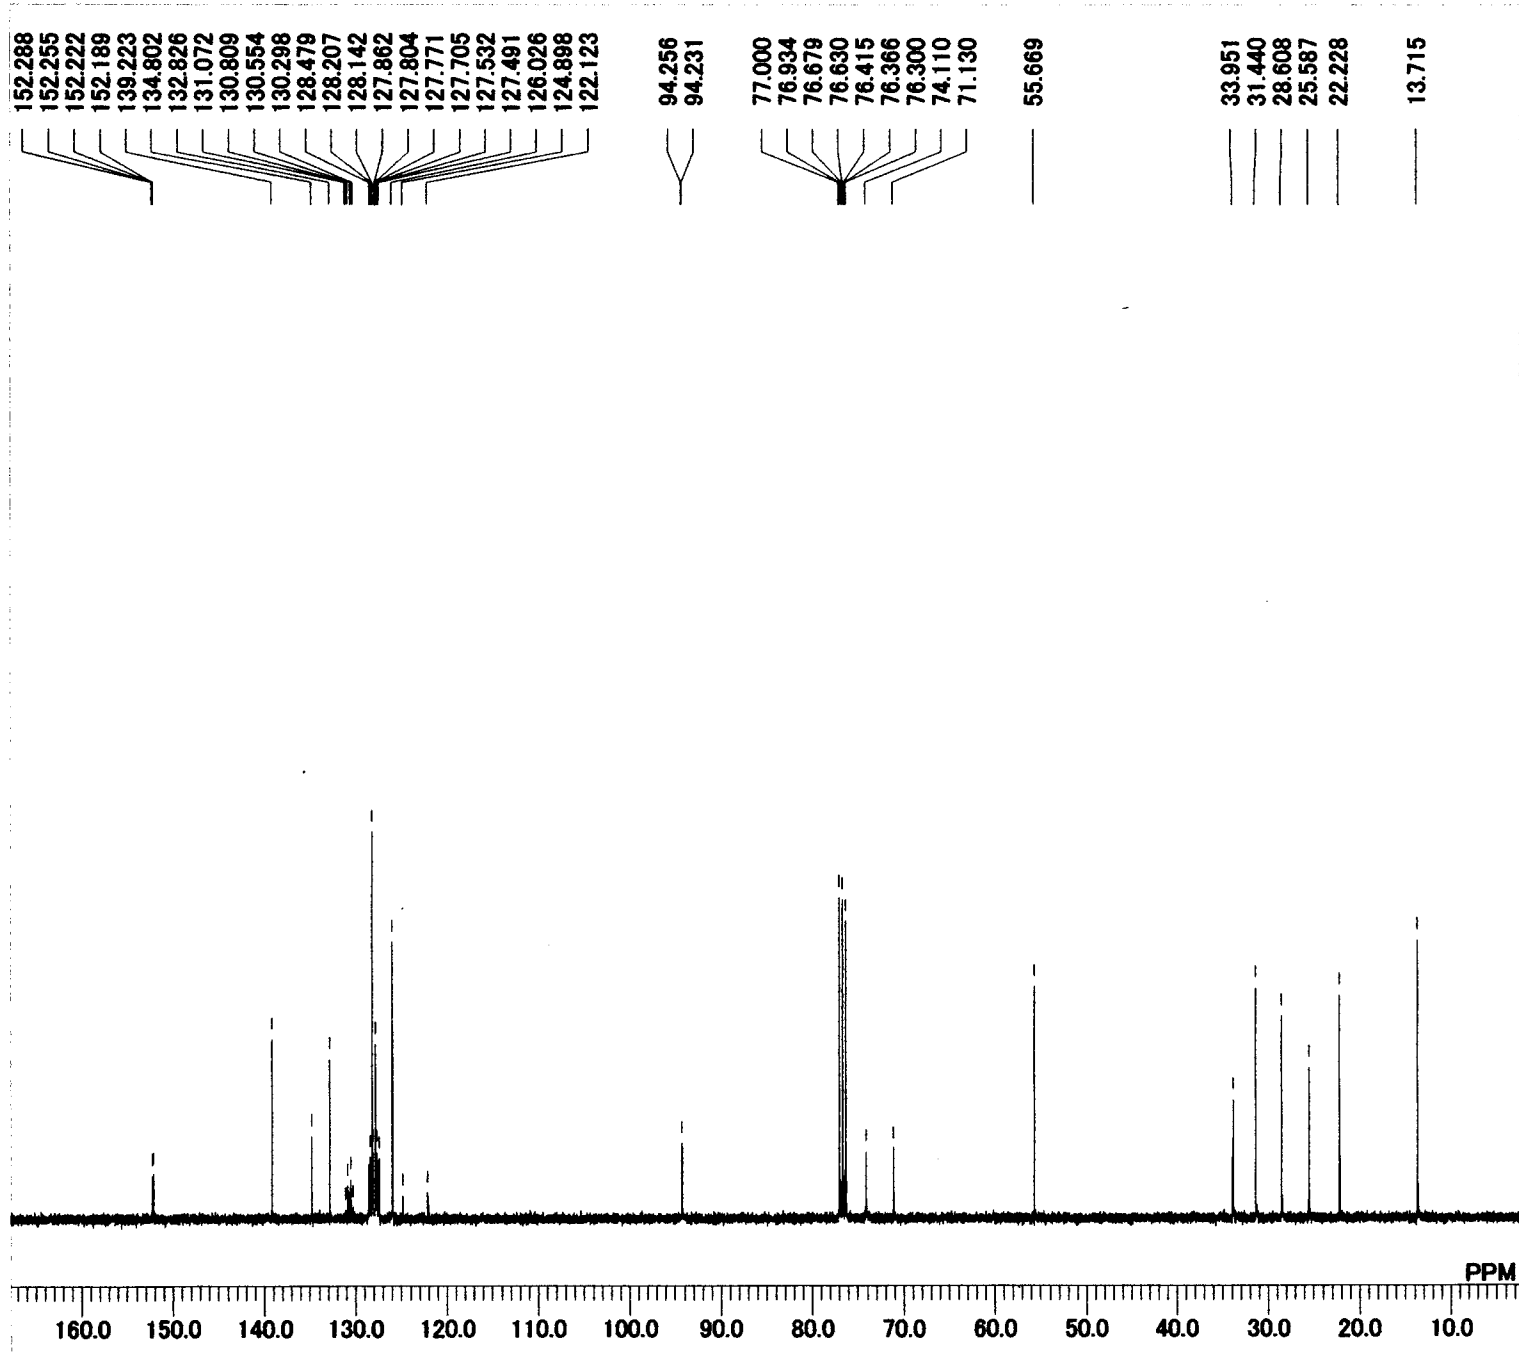

MENUF 13C  
 OBNUC 13C  
 OFR 100.40 MHz  
 OBSET 125.00 KHz  
 OBFIN 10500.00 Hz  
 PW1 6.20 usec  
 DEADT 19.00 usec  
 PREDL 0.20000 msec  
 IWT 1.0000 msec  
 POINT 32768  
 SPO 32768  
 TIMES 10000  
 DUMMY 1  
 FREQU 27118.64 Hz  
 FLT 13550 Hz  
 DELAY 14.80 usec  
 ACQTM 1.2083 sec  
 PD 1.7920 sec  
 ADBIT 16  
 RGAIN 25  
 BF 0.10 Hz  
 T1 0.00  
 T2 0.00  
 T3 90.00  
 T4 100.00  
 EXMOD BCM  
 EXPCM Bilevel.complete.decoupling.Set\_IRRF  
 IRNUC 1H  
 IFR 399.65 MHz  
 IRSET 124.00 KHz  
 IRFIN 10500.00 Hz  
 IRRPW 45 usec  
 IRATN 511  
 DFILE \_DEFAULT.ALS  
 SF TH5ATFG2  
 LKSET 61.60 KHz  
 LKFIN 79.0 Hz  
 LKLEV 180  
 LGAIN 24  
 LKPHS 240  
 LKSIG 1218  
 CSPED 12 Hz  
 FILDC  
 FILDF

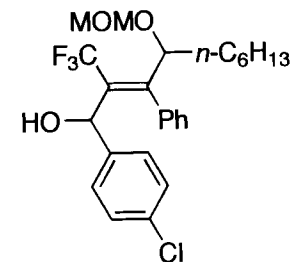

Major

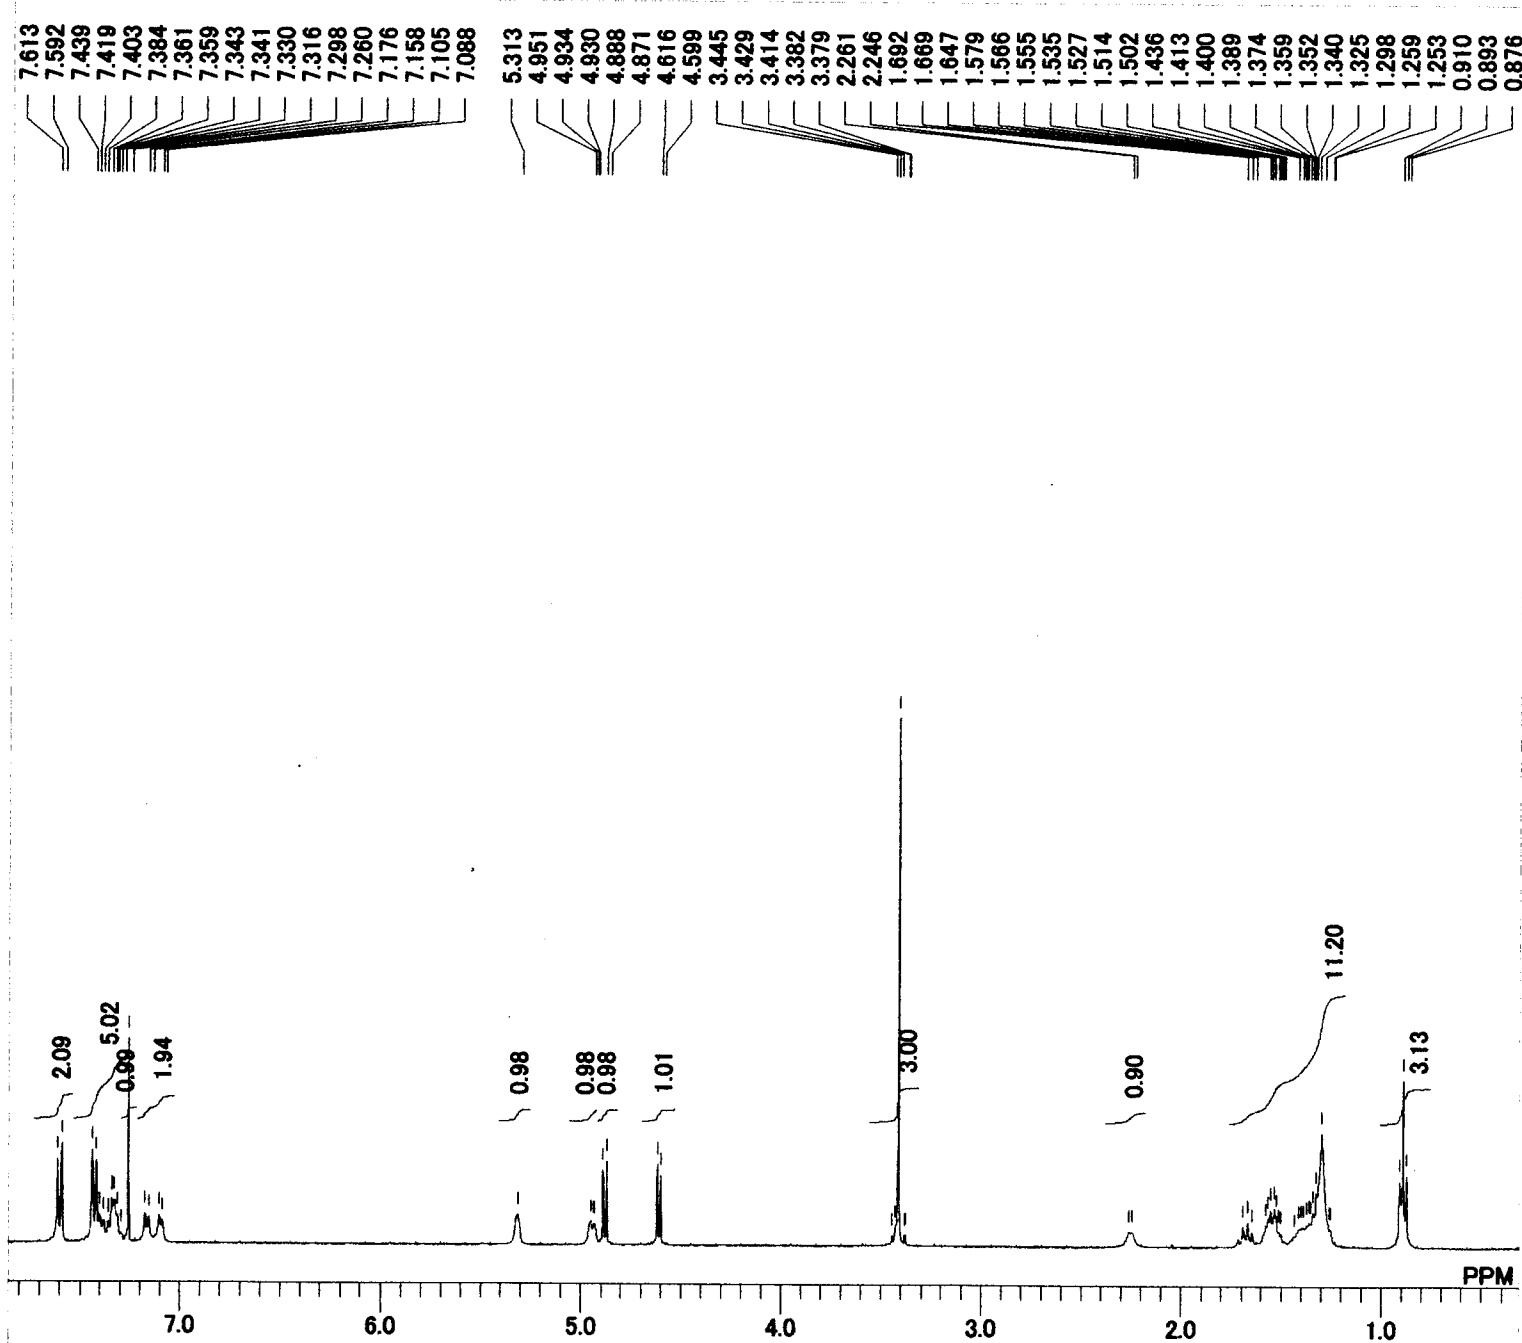

MENUF 1H  
 OBNUC 1H  
 OFR 399.65 MHz  
 OBSET 135.40 KHz  
 OBFIN 24.90 Hz  
 PW1 5.50 usec  
 DEADT 72.20 usec  
 PREDL 0.20000 msec  
 IWT 1.0000 msec  
 POINT 16384  
 SPO 16384  
 TIMES 8  
 DUMMY 1  
 FREQU 7992.01 Hz  
 FLT 4000 Hz  
 DELAY 50.00 usec  
 ACQTM 2.0501 sec  
 PD 4.9500 sec  
 ADBIT 16  
 RGAIN 18  
 BF 0.10 Hz  
 T1 0.00  
 T2 0.00  
 T3 90.00  
 T4 100.00  
 EXMOD NON  
 EXPCM NON:Single.coupled:PW1\_ACQTM\_PC  
 IRNUC 1H  
 IFR 399.65 MHz  
 IRSET 136.90 KHz  
 IRFIN 97.50 Hz  
 IRRPW 45 usec  
 IRATN 511  
 DFILE \_DEFAULT.ALS  
 SF TH5ATFG2  
 LKSET 61.60 KHz  
 LKFIN 79.0 Hz  
 LKLEV 180  
 LGAIN 21  
 LKPHS 240  
 LKSIG 574  
 CSPED 13 Hz  
 FILDC  
 FILDF

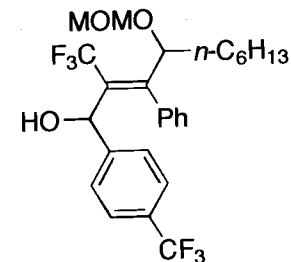

Minor

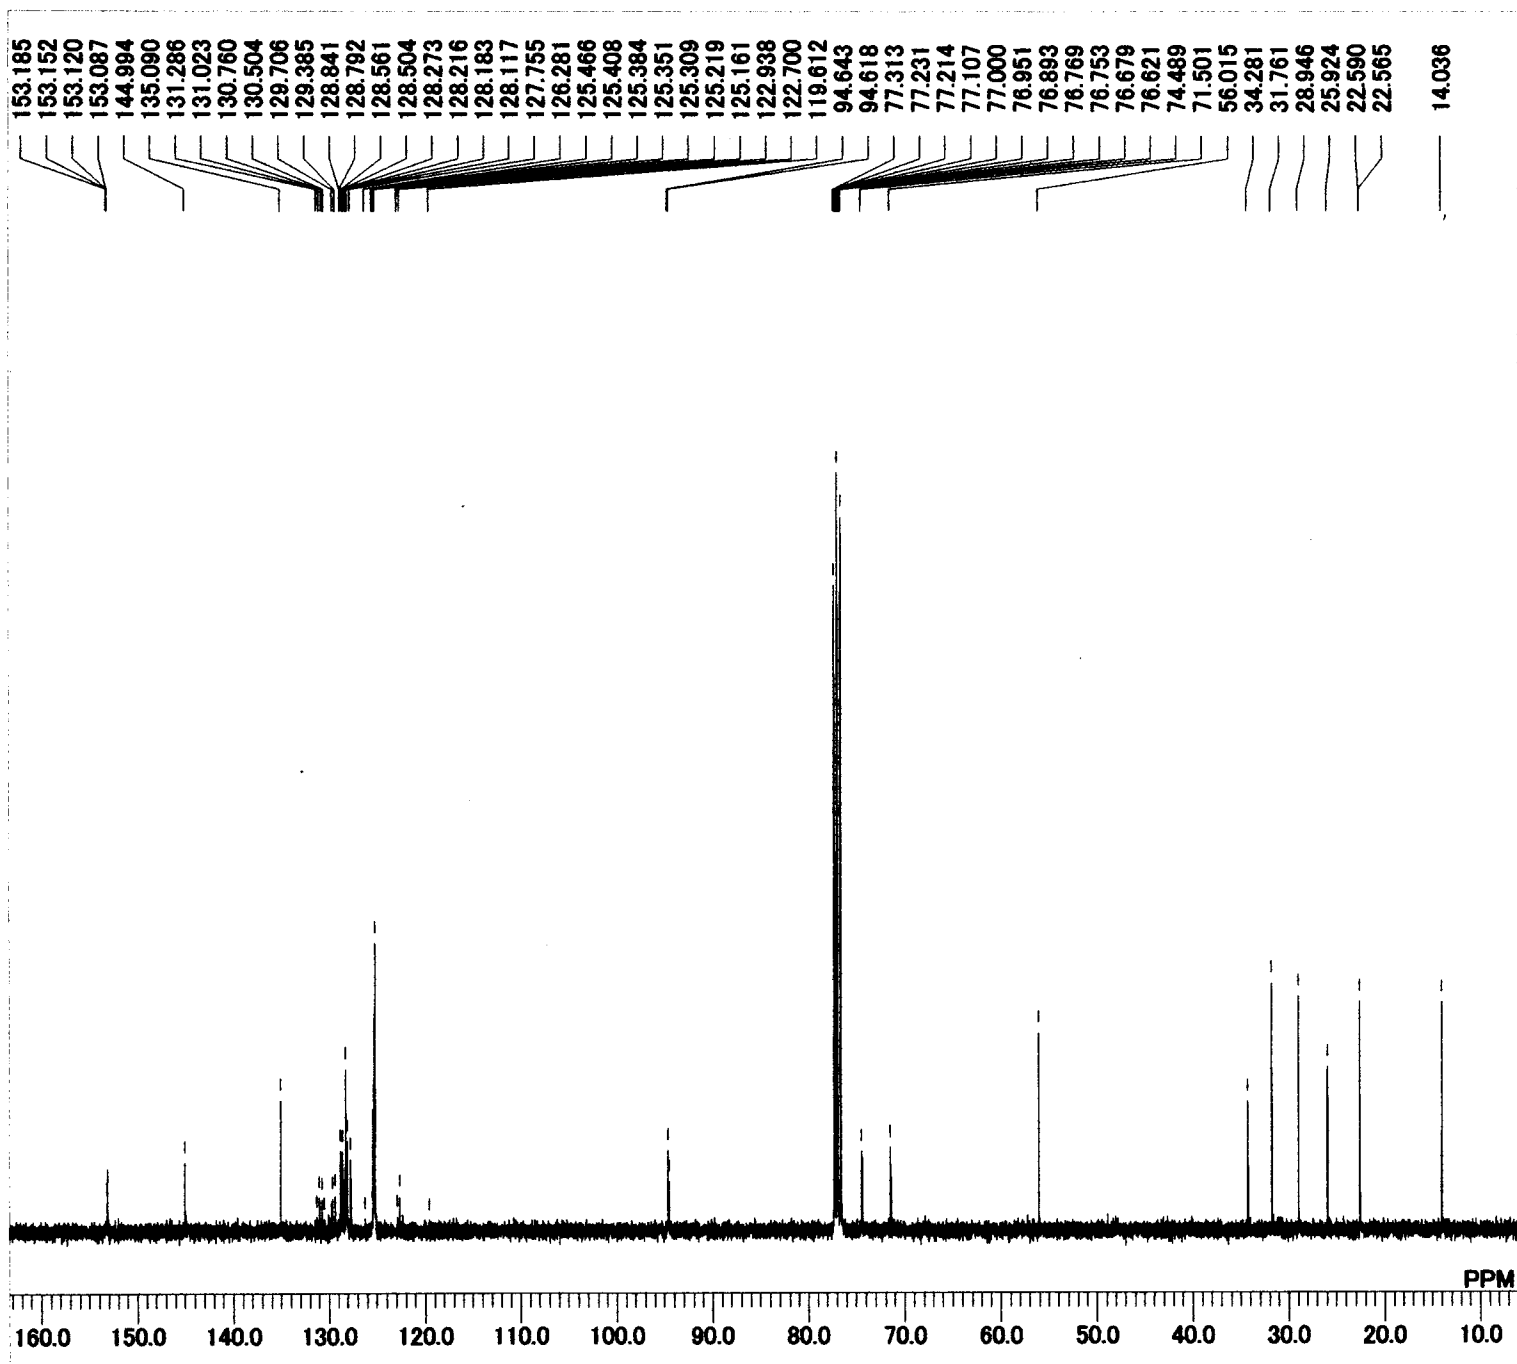

MENUF 13C  
OBNUC 13C  
OFR 100.40 MHz  
OBSET 125.00 KHz  
OBFIN 10500.00 Hz  
PW1 6.20 usec  
DEADT 19.00 usec  
PREDL 0.20000 msec  
IWT 1.0000 msec  
POINT 32768  
SPO 32768  
TIMES 10000  
DUMMY 1  
FREQU 27118.64 Hz  
FLT 13550 Hz  
DELAY 14.80 usec  
ACQTM 1.2083 sec  
PD 1.7920 sec  
ADBIT 16  
RGAIN 25  
BF 0.00 Hz  
T1 0.00  
T2 0.00  
T3 90.00  
T4 100.00  
EXMOD BCM  
EXPCM Bilevel.complete.decoupling:Set\_IRRF  
IRNUC 1H  
IFR 399.65 MHz  
IRSET 124.00 KHz  
IRFIN 10500.00 Hz  
IRRPW 45 usec  
IRATN 511  
DFILE \_DEFAULT.ALS  
SF TH5ATFG2  
LKSET 61.60 KHz  
LKFIN 79.0 Hz  
LKLEV 180  
LGAIN 24  
LKPHS 240  
LKSIG 954  
CSPED 10 Hz  
FILDC  
FILDF

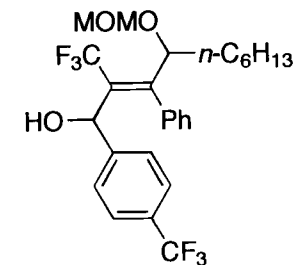

Minor

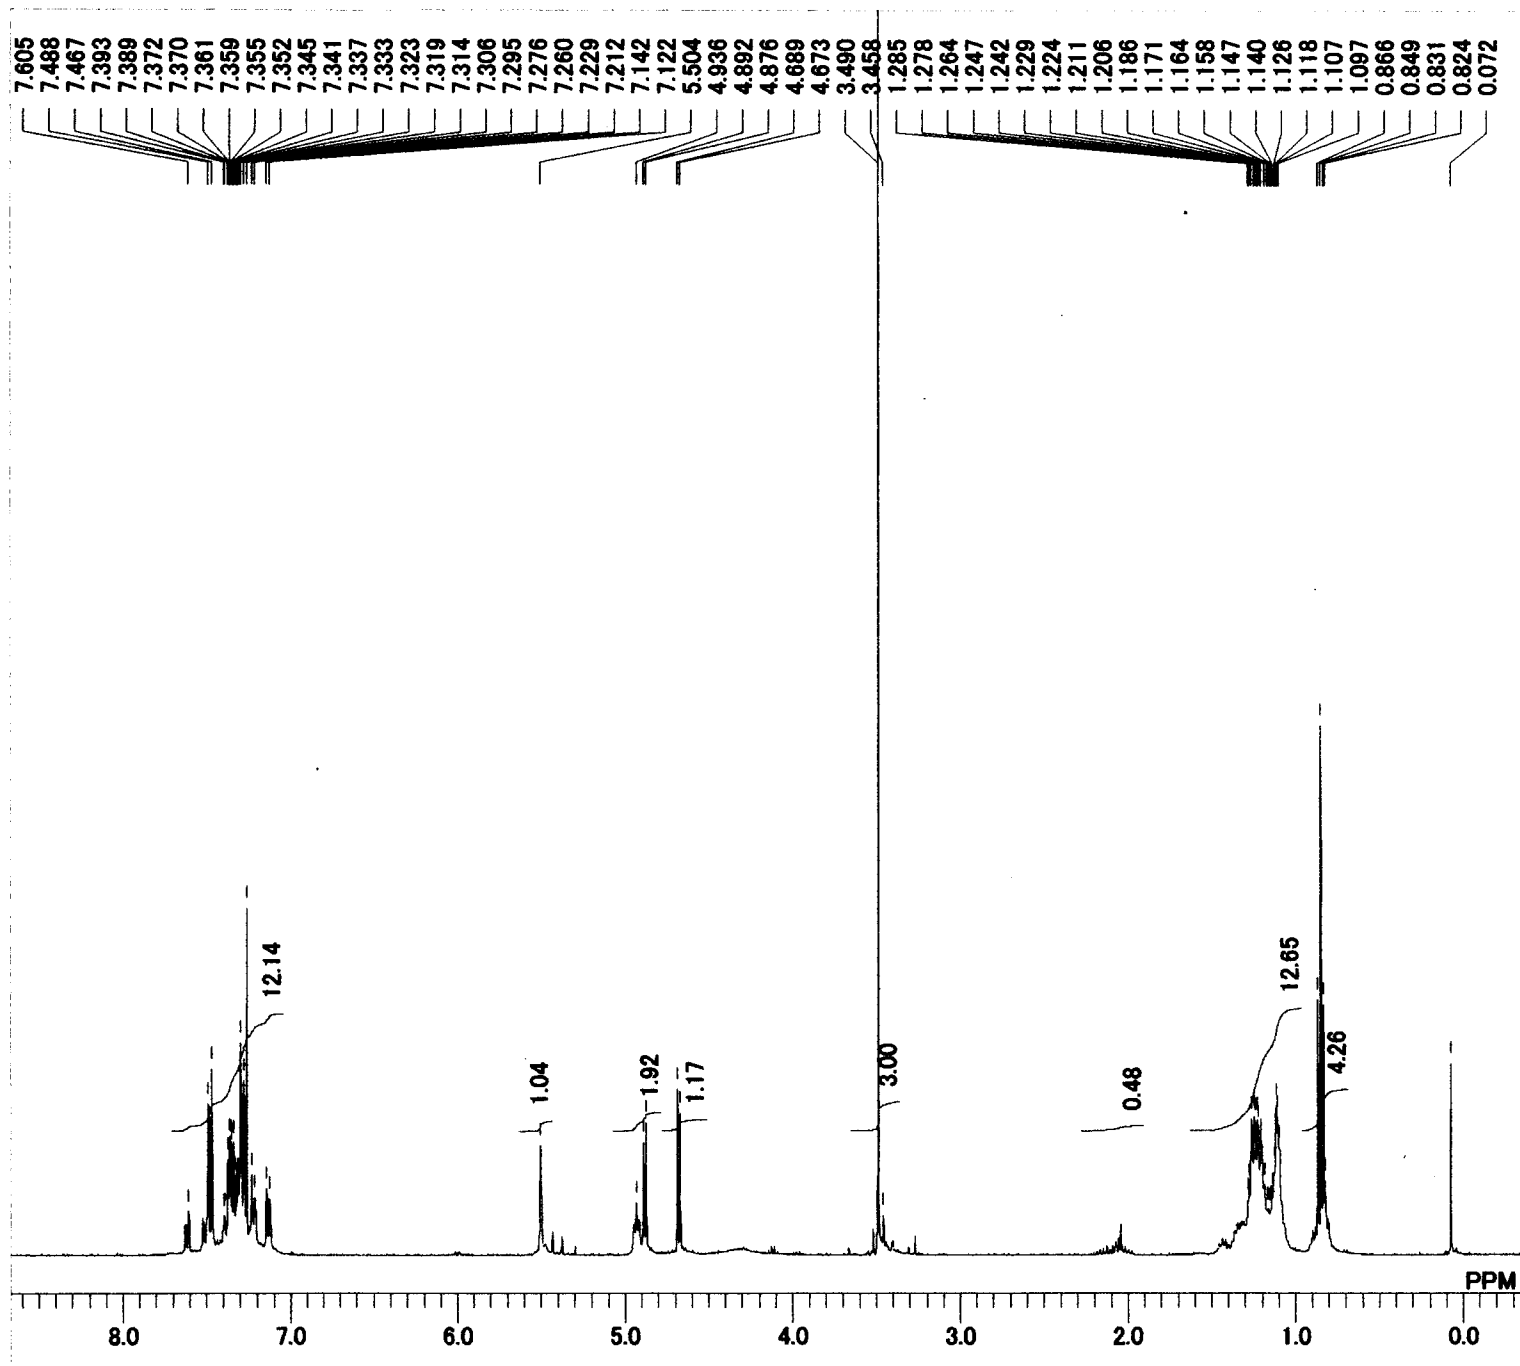

MENUF 1H  
OBNUC 1H  
OFR 399.65 MHz  
OBSET 135.40 KHz  
OBFIN 24.90 Hz  
PW1 5.50 usec  
DEADT 72.20 usec  
PREDL 0.20000 msec  
IWT 1.0000 msec  
POINT 16384  
SPO 16384  
TIMES 8  
DUMMY 1  
FREQU 7992.01 Hz  
FLT 4000 Hz  
DELAY 50.00 usec  
ACQTM 2.0501 sec  
PD 4.9500 sec  
ADBIT 16  
RGAIN 16  
BF 0.10 Hz  
T1 0.00  
T2 0.00  
T3 90.00  
T4 100.00  
EXMOD NON  
EXPCM NON:Single.coupled:PW1\_ACQTM\_PI  
IRNUC 1H  
IFR 399.65 MHz  
IRSET 136.90 KHz  
IRFIN 97.50 Hz  
IRRPW 45 usec  
IRATN 511  
DFILE 551 SHITA H.als  
SF TH5ATFG2  
LKSET 61.60 KHz  
LKFIN 79.0 Hz  
LKLEV 180  
LGAIN 22  
LKPHS 240  
LKSIG 765  
CSPED 13 Hz  
FILDC  
FILDF

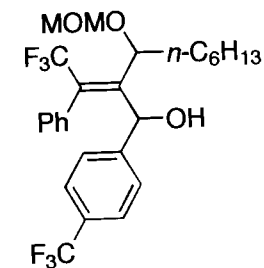

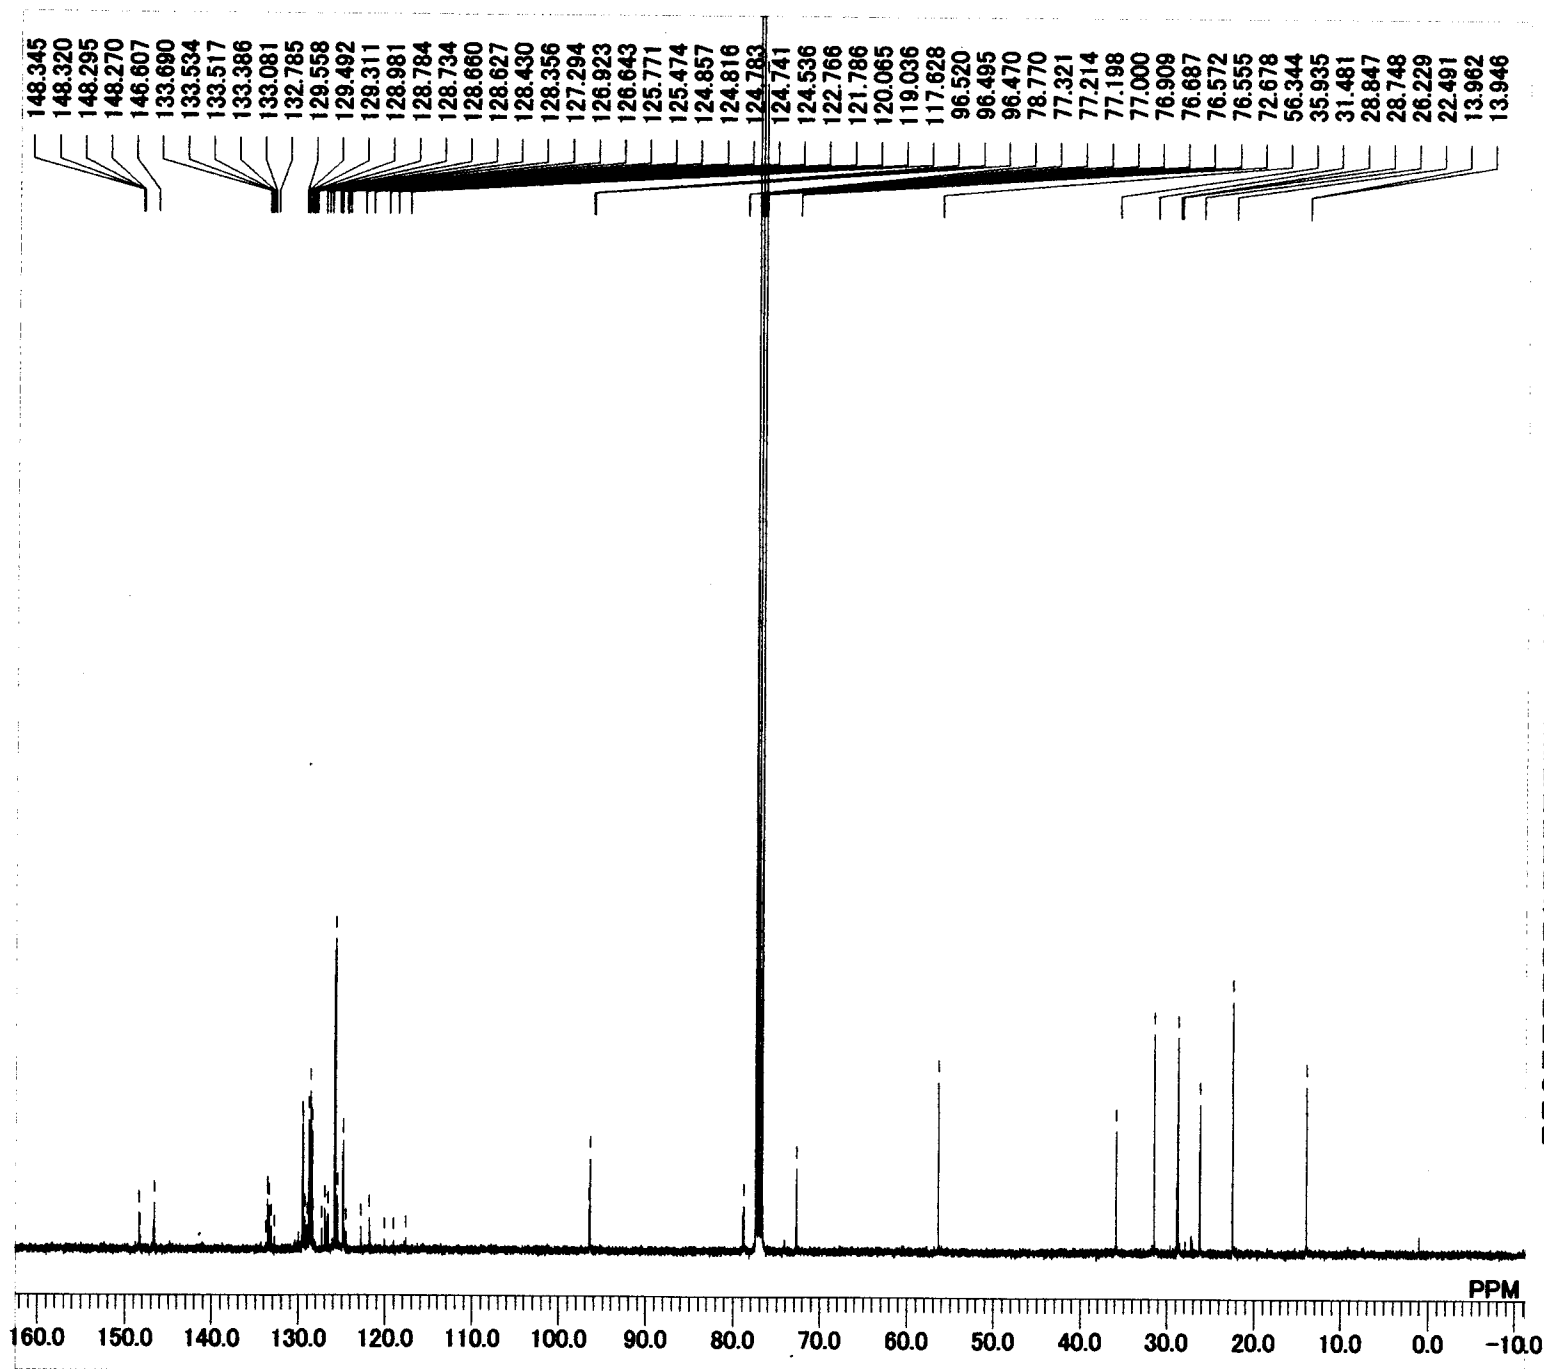

MENUF 13C  
OBNUC 13C  
OFR 100.40 MHz  
OBSET 125.00 KHz  
OBFIN 10500.00 Hz  
PW1 6.20 usec  
DEADT 19.00 usec  
PREDL 0.20000 msec  
IWT 1.0000 msec  
POINT 32768  
SPO 32768  
TIMES 20000  
DUMMY 1  
FREQU 27118.64 Hz  
FLT 13550 Hz  
DELAY 14.80 usec  
ACQTM 1.2083 sec  
PD 1.7920 sec  
ADBIT 16  
RGAIN 25  
BF 0.10 Hz  
T1 0.00  
T2 0.00  
T3 90.00  
T4 100.00  
EXMOD BCM  
EXPCM Bilevel.complete.decoupling:Set\_IRRF  
IRNUC 1H  
IFR 399.65 MHz  
IRSET 124.00 KHz  
IRFIN 10500.00 Hz  
IRRPW 45 usec  
IRATN 511  
DFILE \_DEFAULT.ALS  
SF TH5ATFG2  
LKSET 61.60 KHz  
LKFIN 79.0 Hz  
LKLEV 180  
LGAIN 22  
LKPHS 240  
LKSIG 783  
CSPED 14 Hz  
FILDC  
FILDF

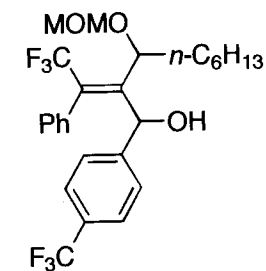

Supplement: c3ob41903g.pdf [file c3ob41903g.pdf]
